# Supplementary material for: Synthesis and characterisation of novel o-xylene-based P,E ligands
Source: Royal Society of Chemistry journal article supplement (doi:10.1039/c3ob42244e), 2013-12-13

**Compound 2**

<sup>1</sup>H NMR, 600 MHz, CDCl<sub>3</sub>

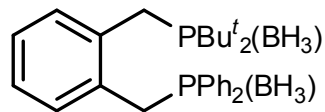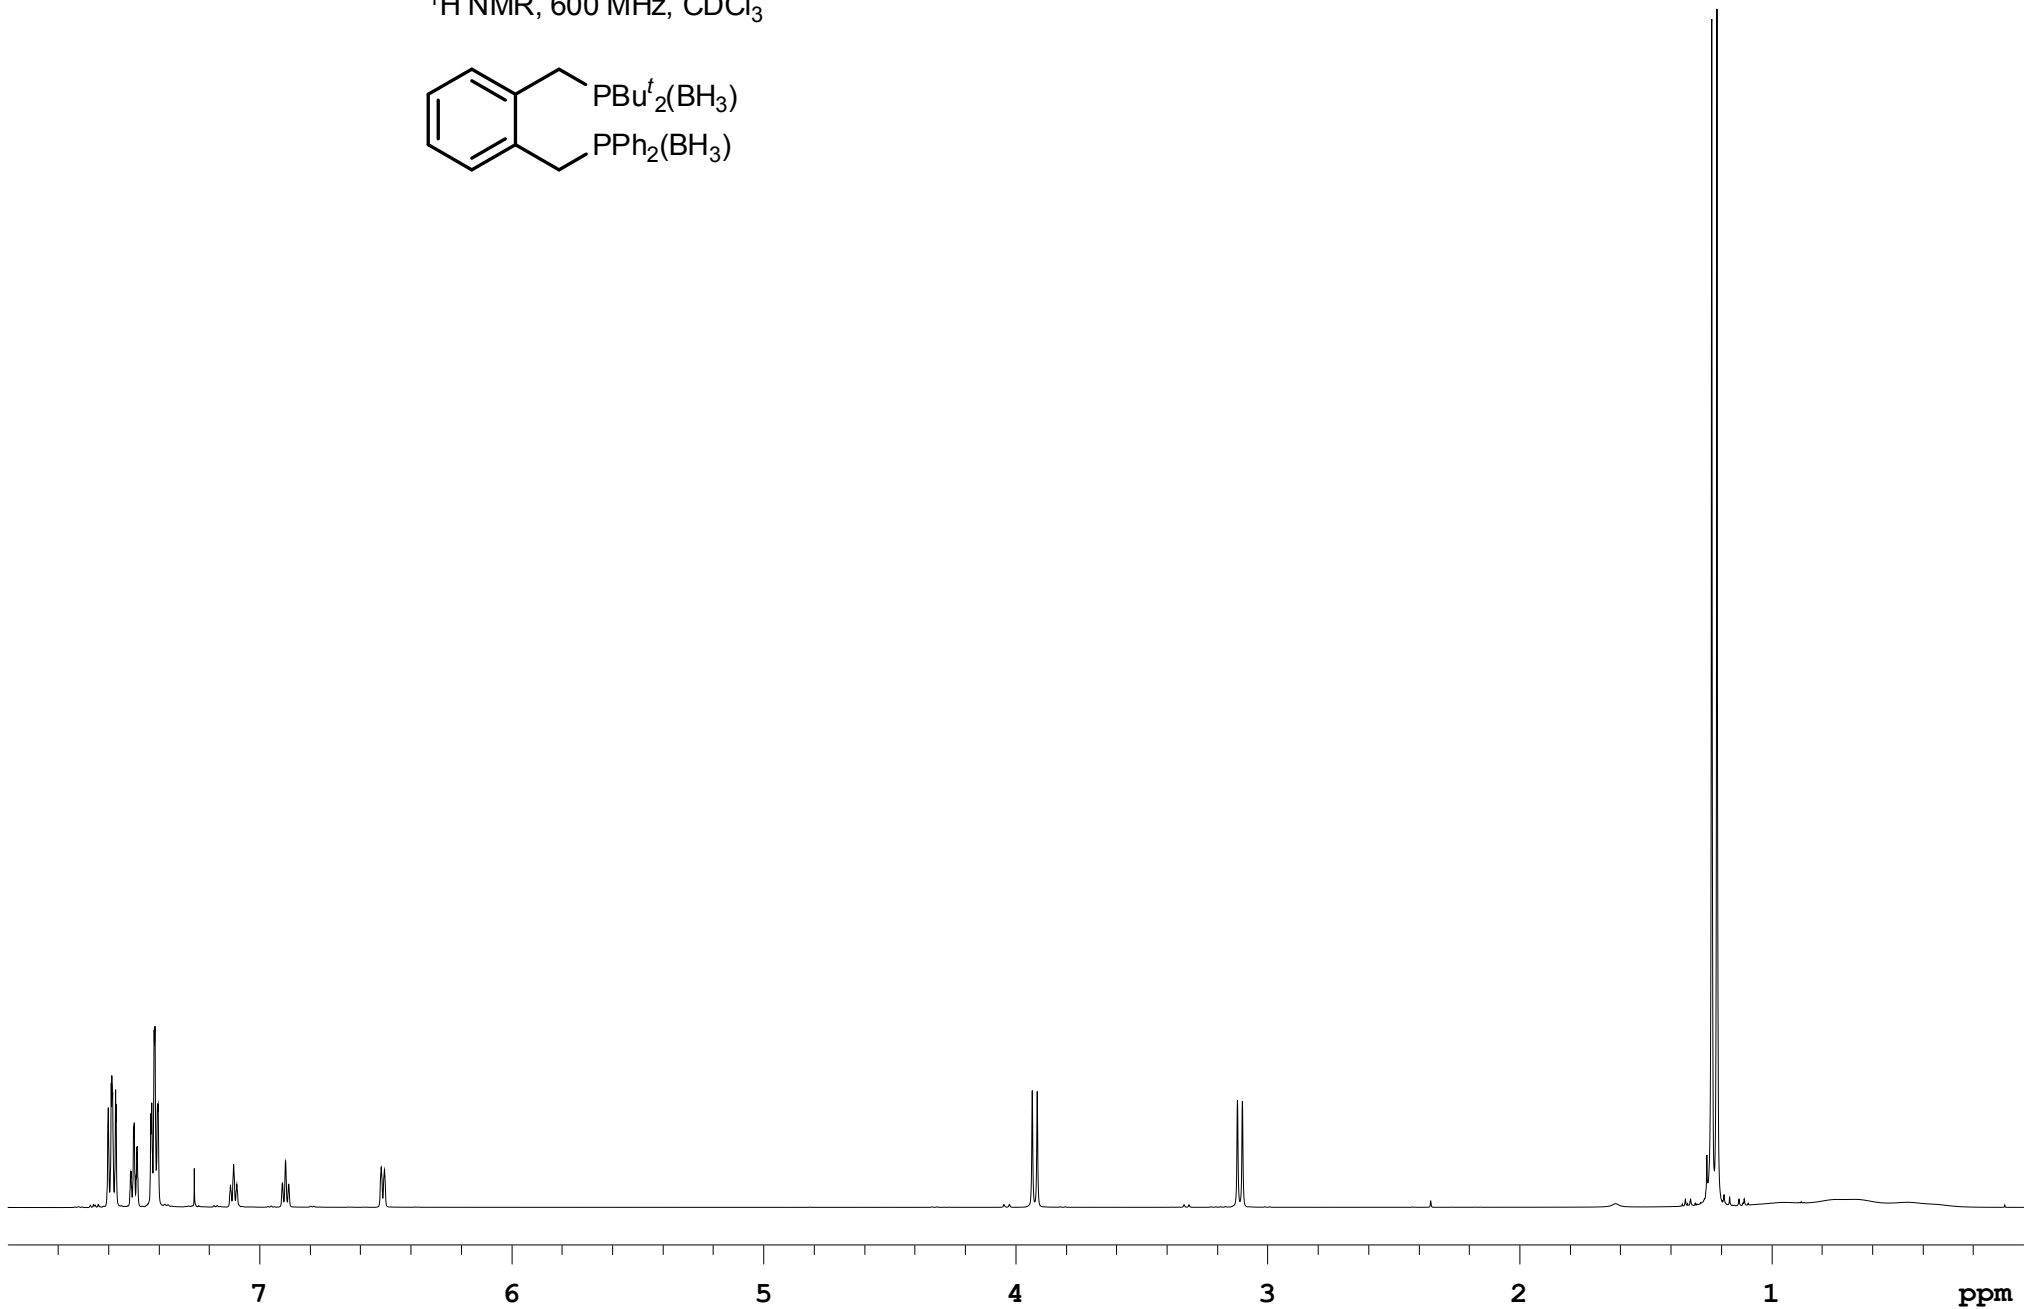

**Compound 2**  
<sup>13</sup>C NMR, 150 MHz, CDCl<sub>3</sub>

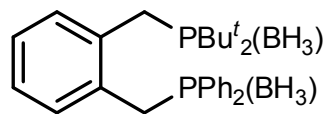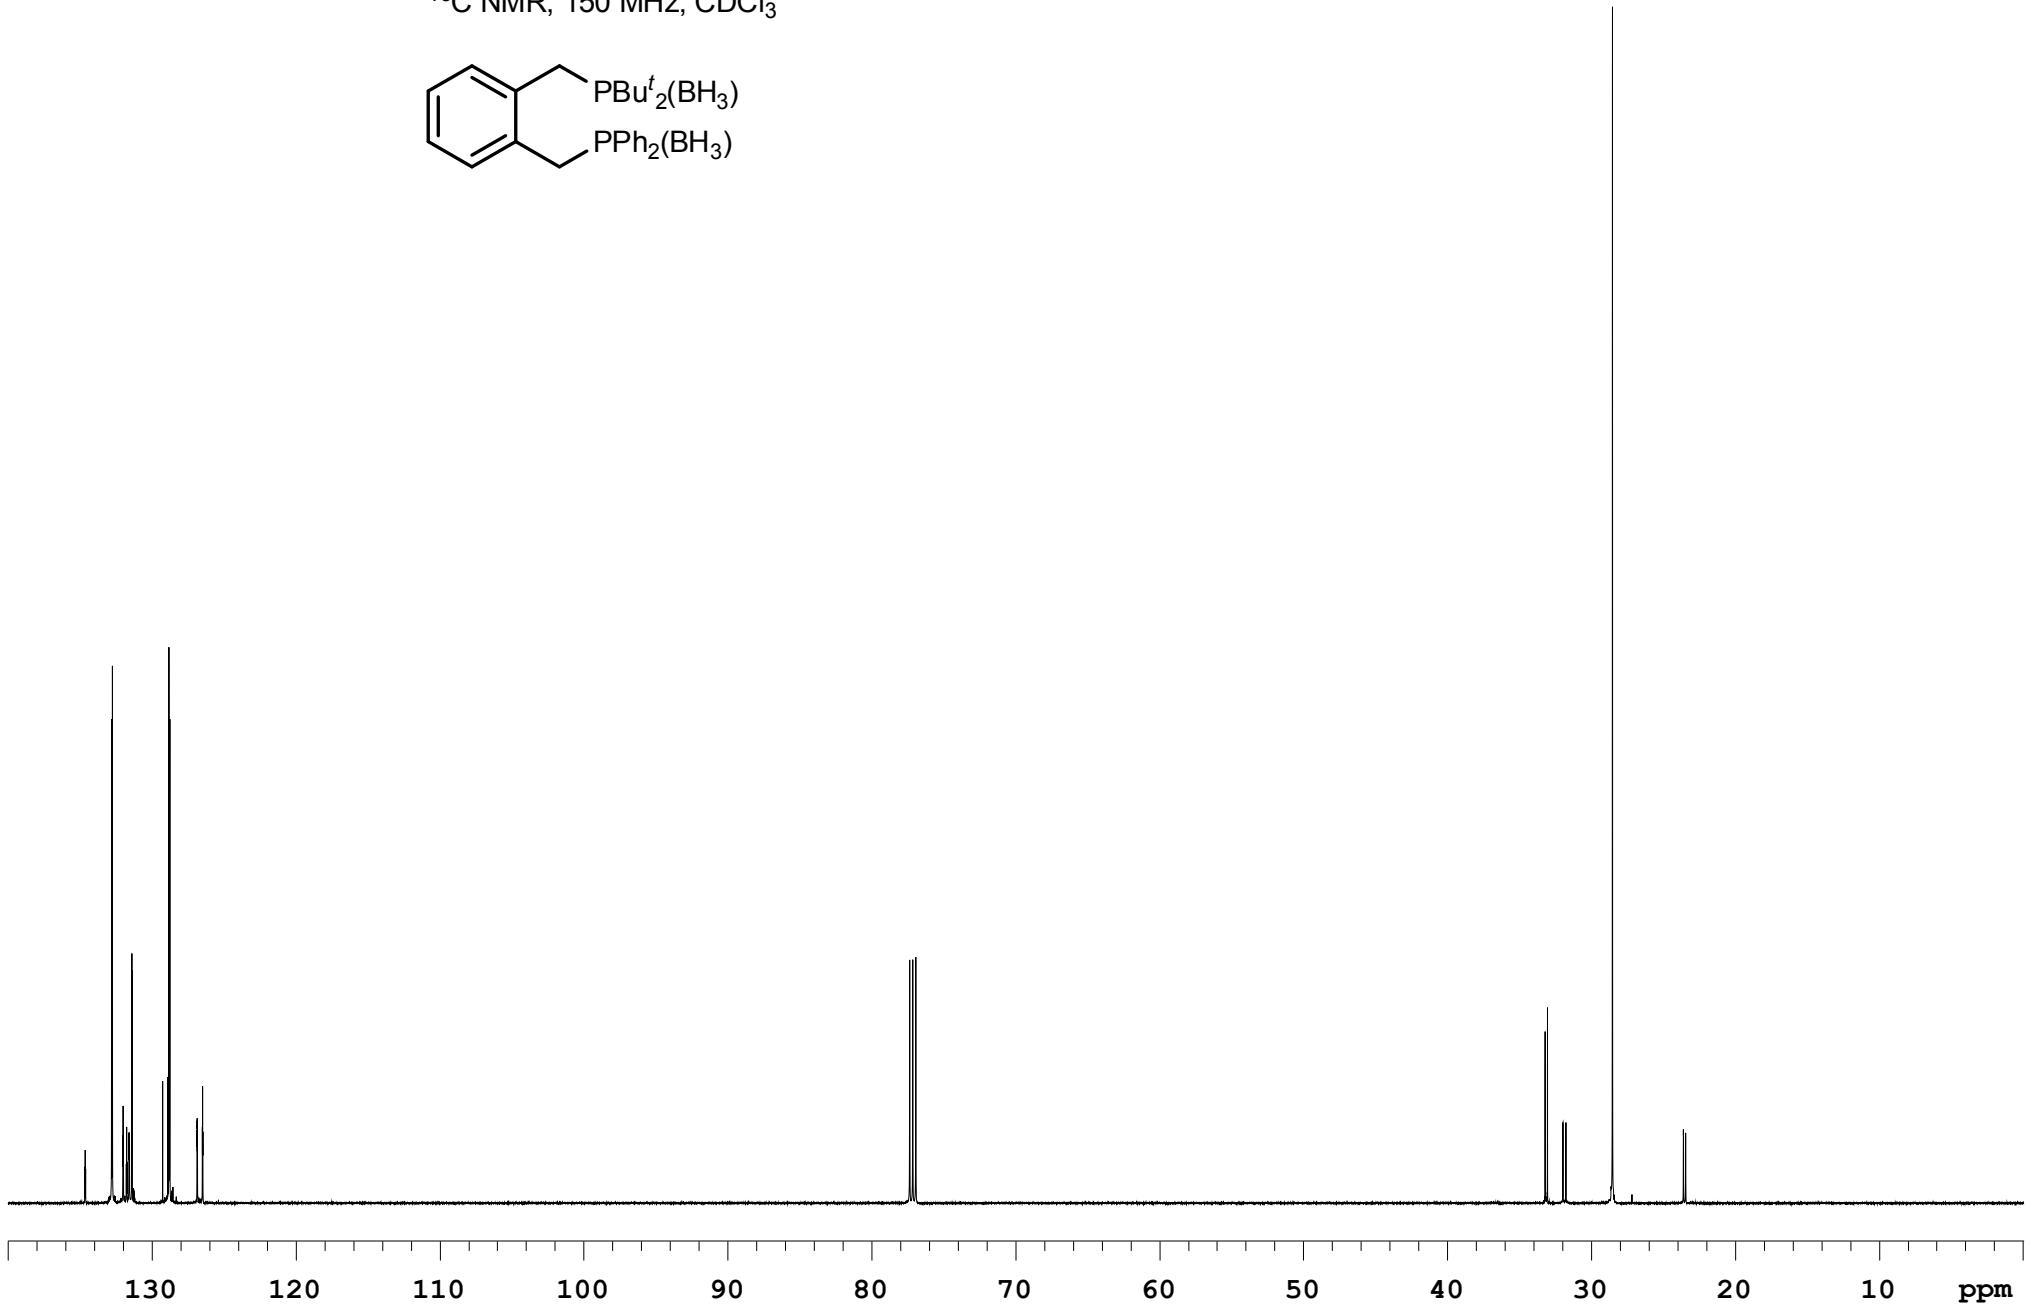

**Compound 3**  
<sup>1</sup>H NMR, 500 MHz, C<sub>6</sub>D<sub>6</sub>

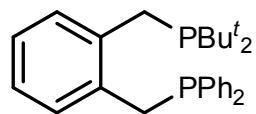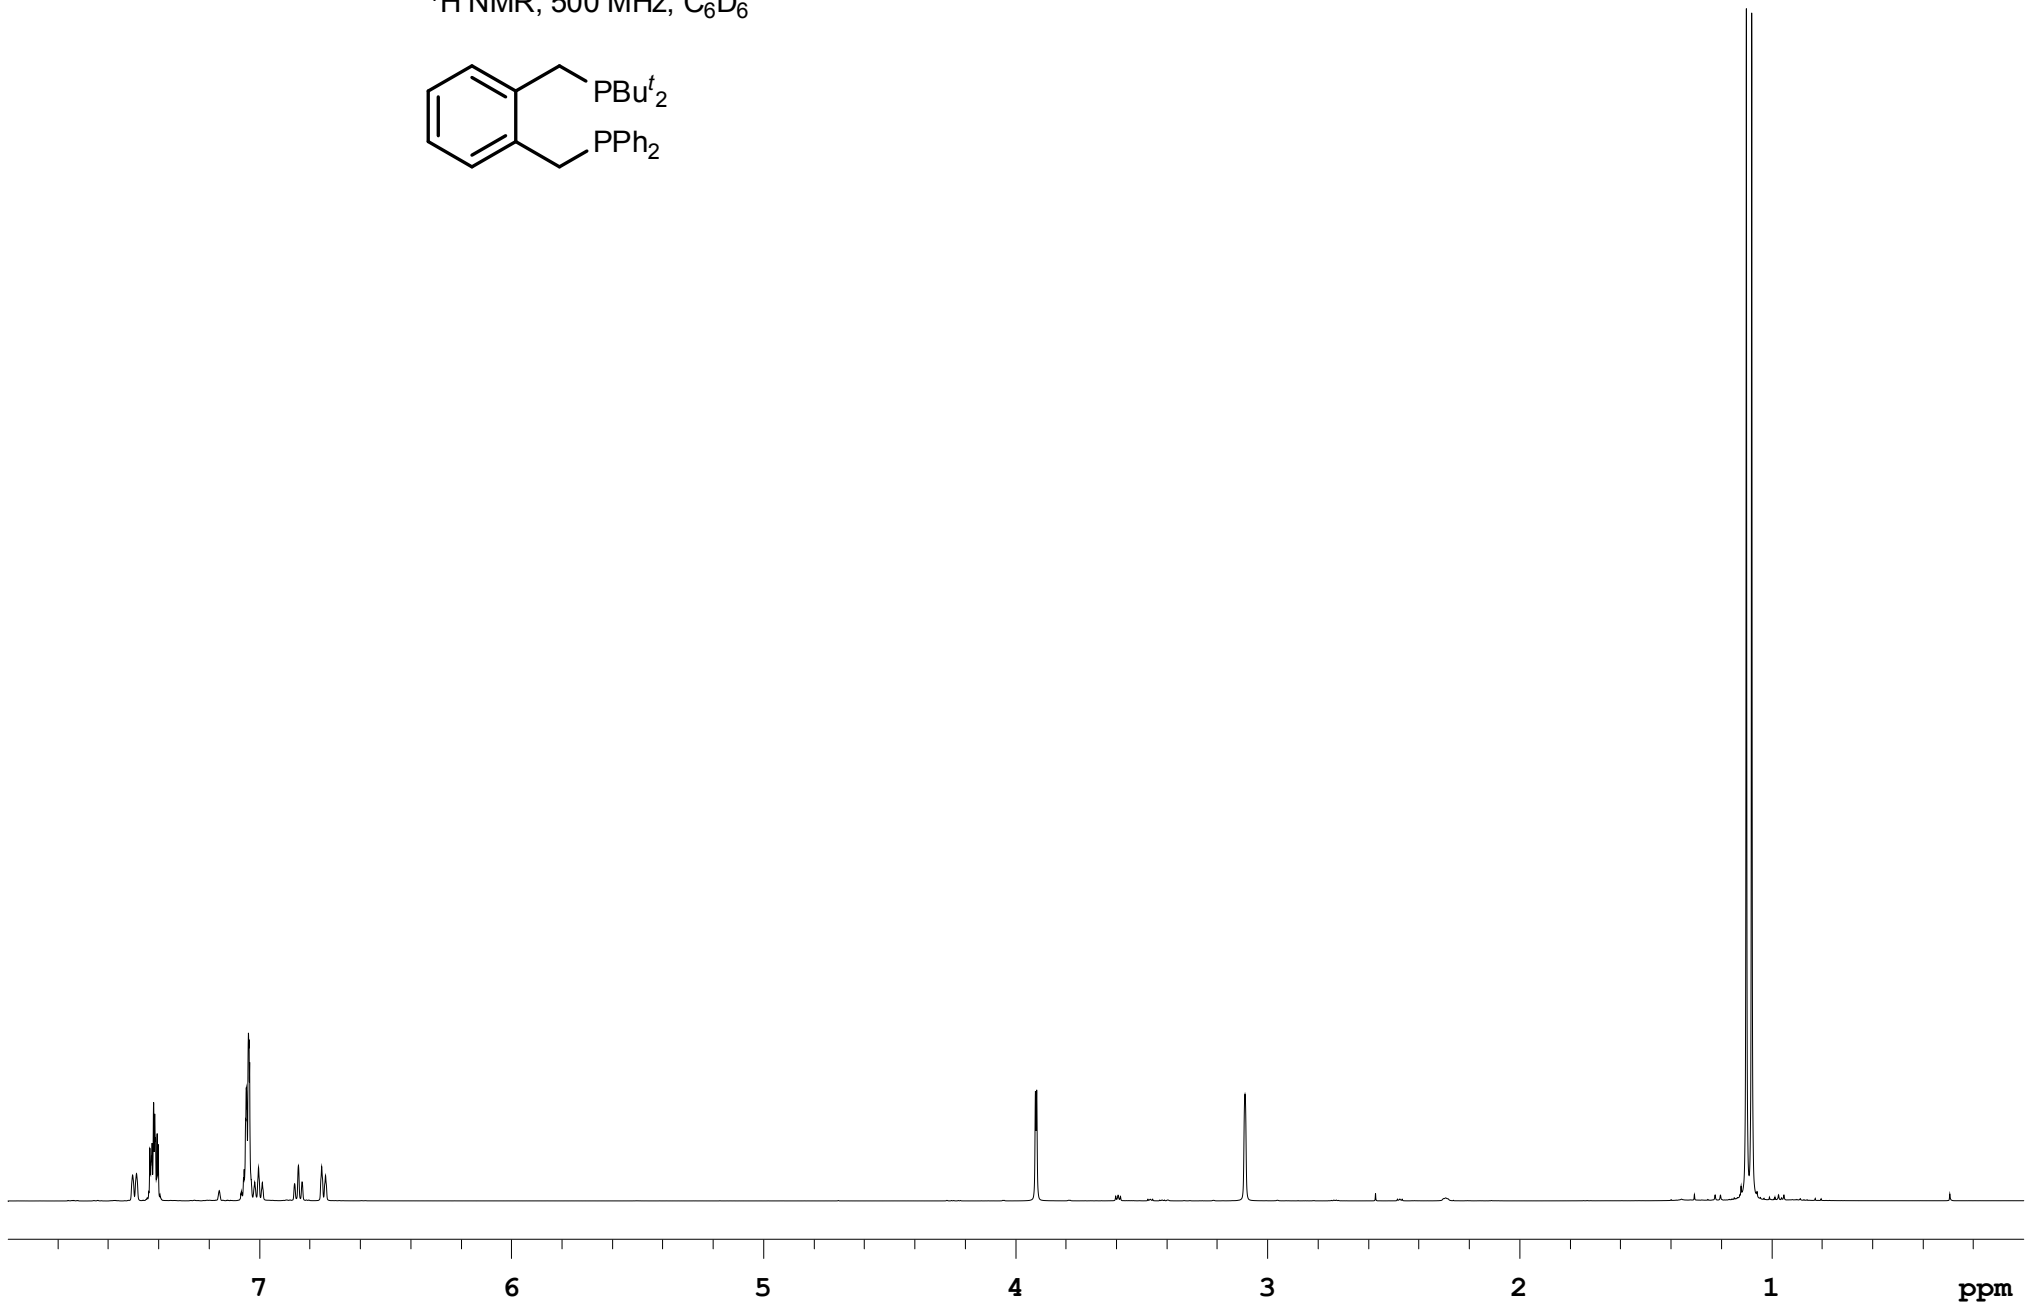

**Compound 3**  
<sup>13</sup>C NMR, 125 MHz, C<sub>6</sub>D<sub>6</sub>

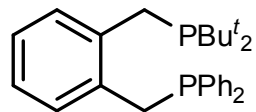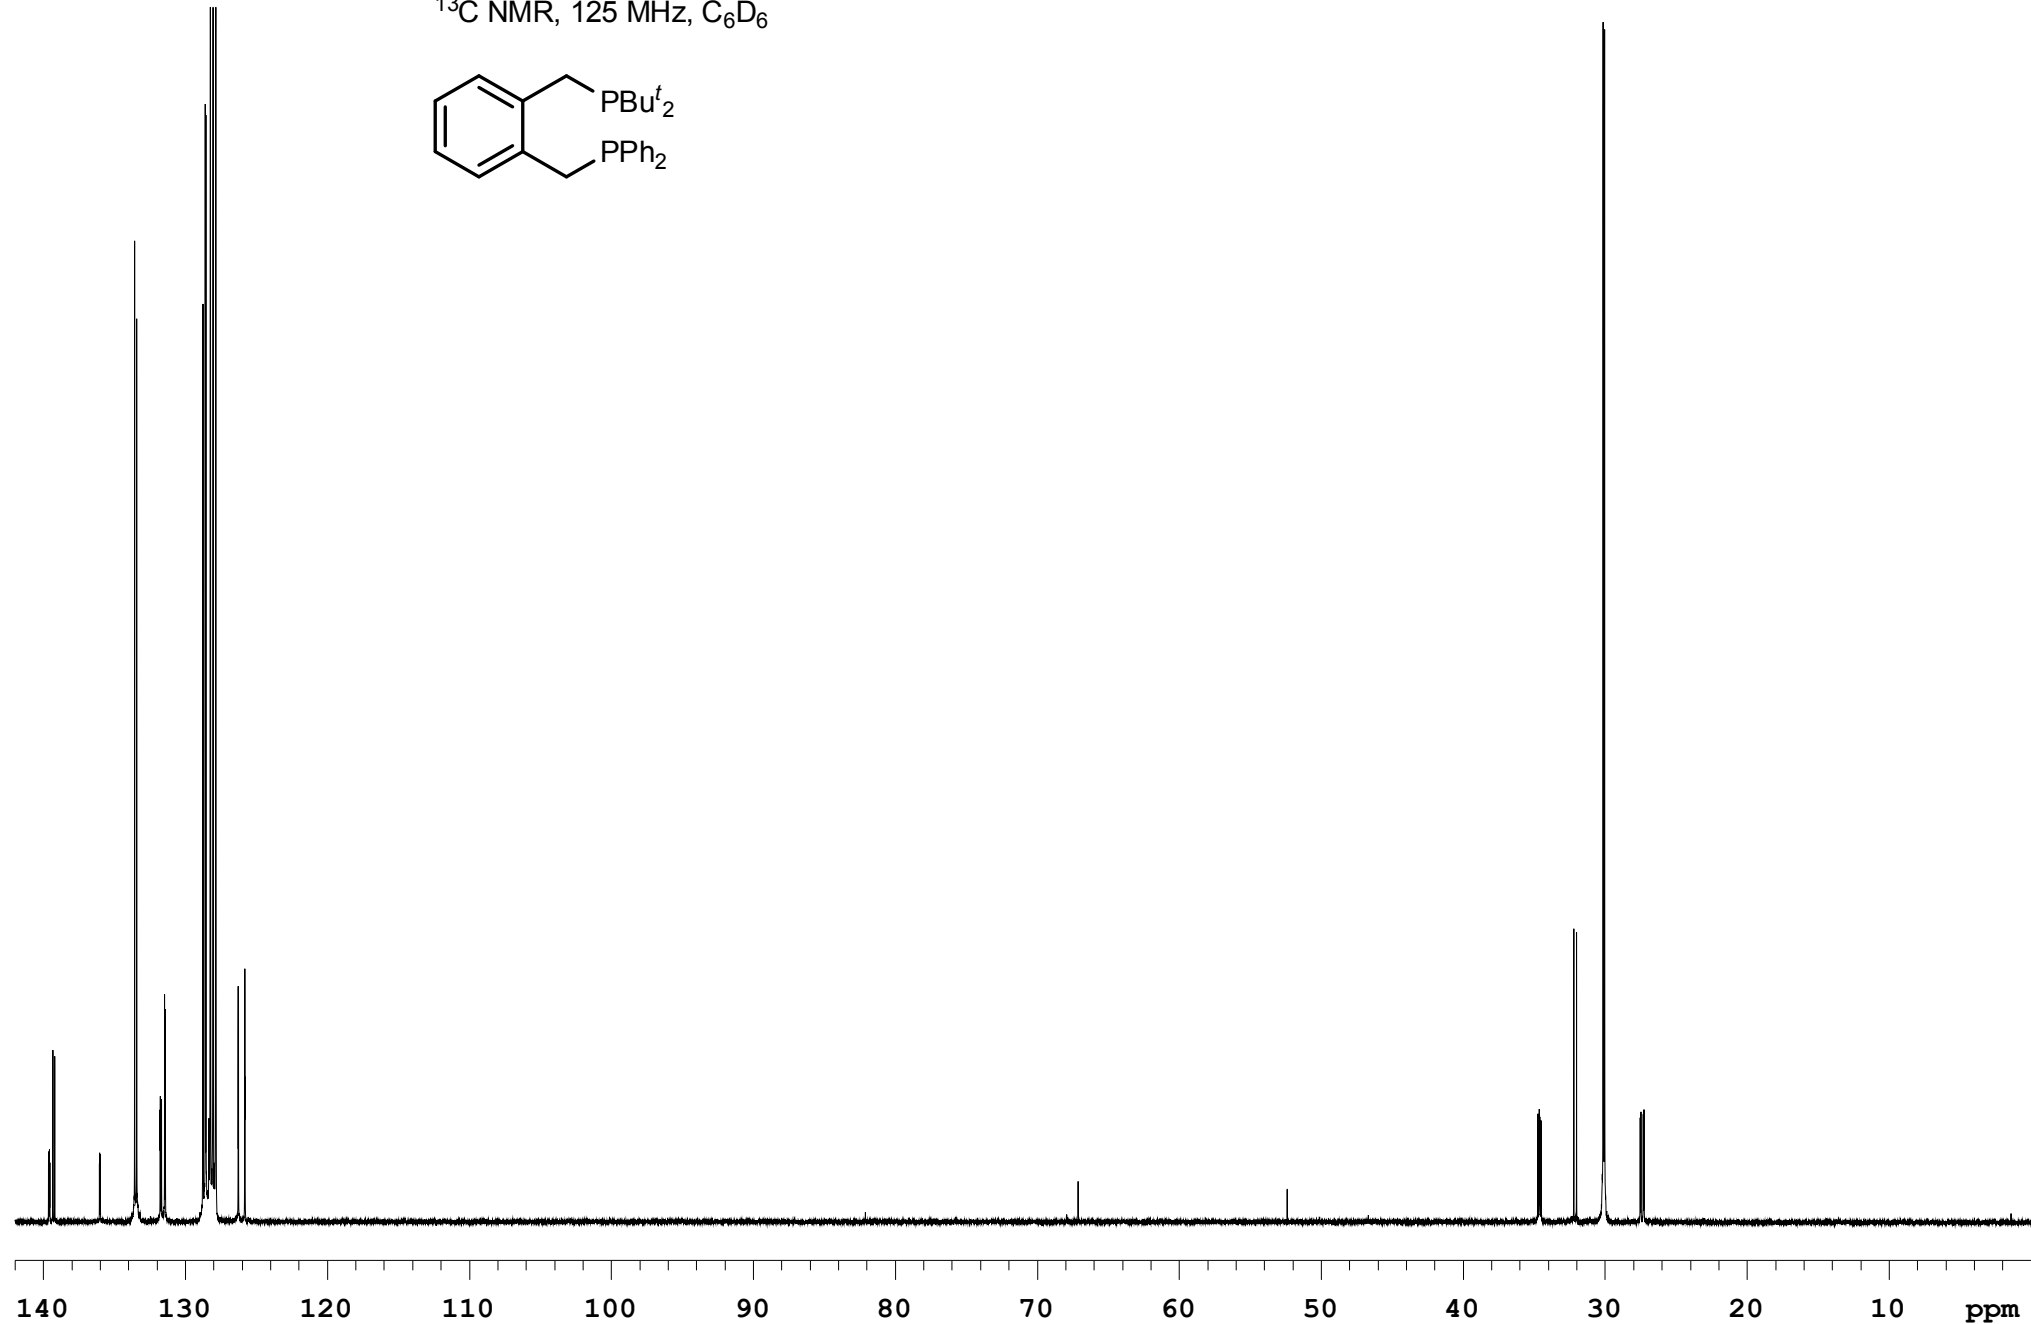

**Compound 4**

<sup>1</sup>H NMR, 500 MHz, C<sub>6</sub>D<sub>6</sub>

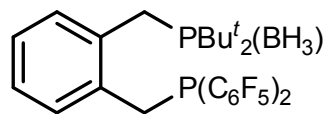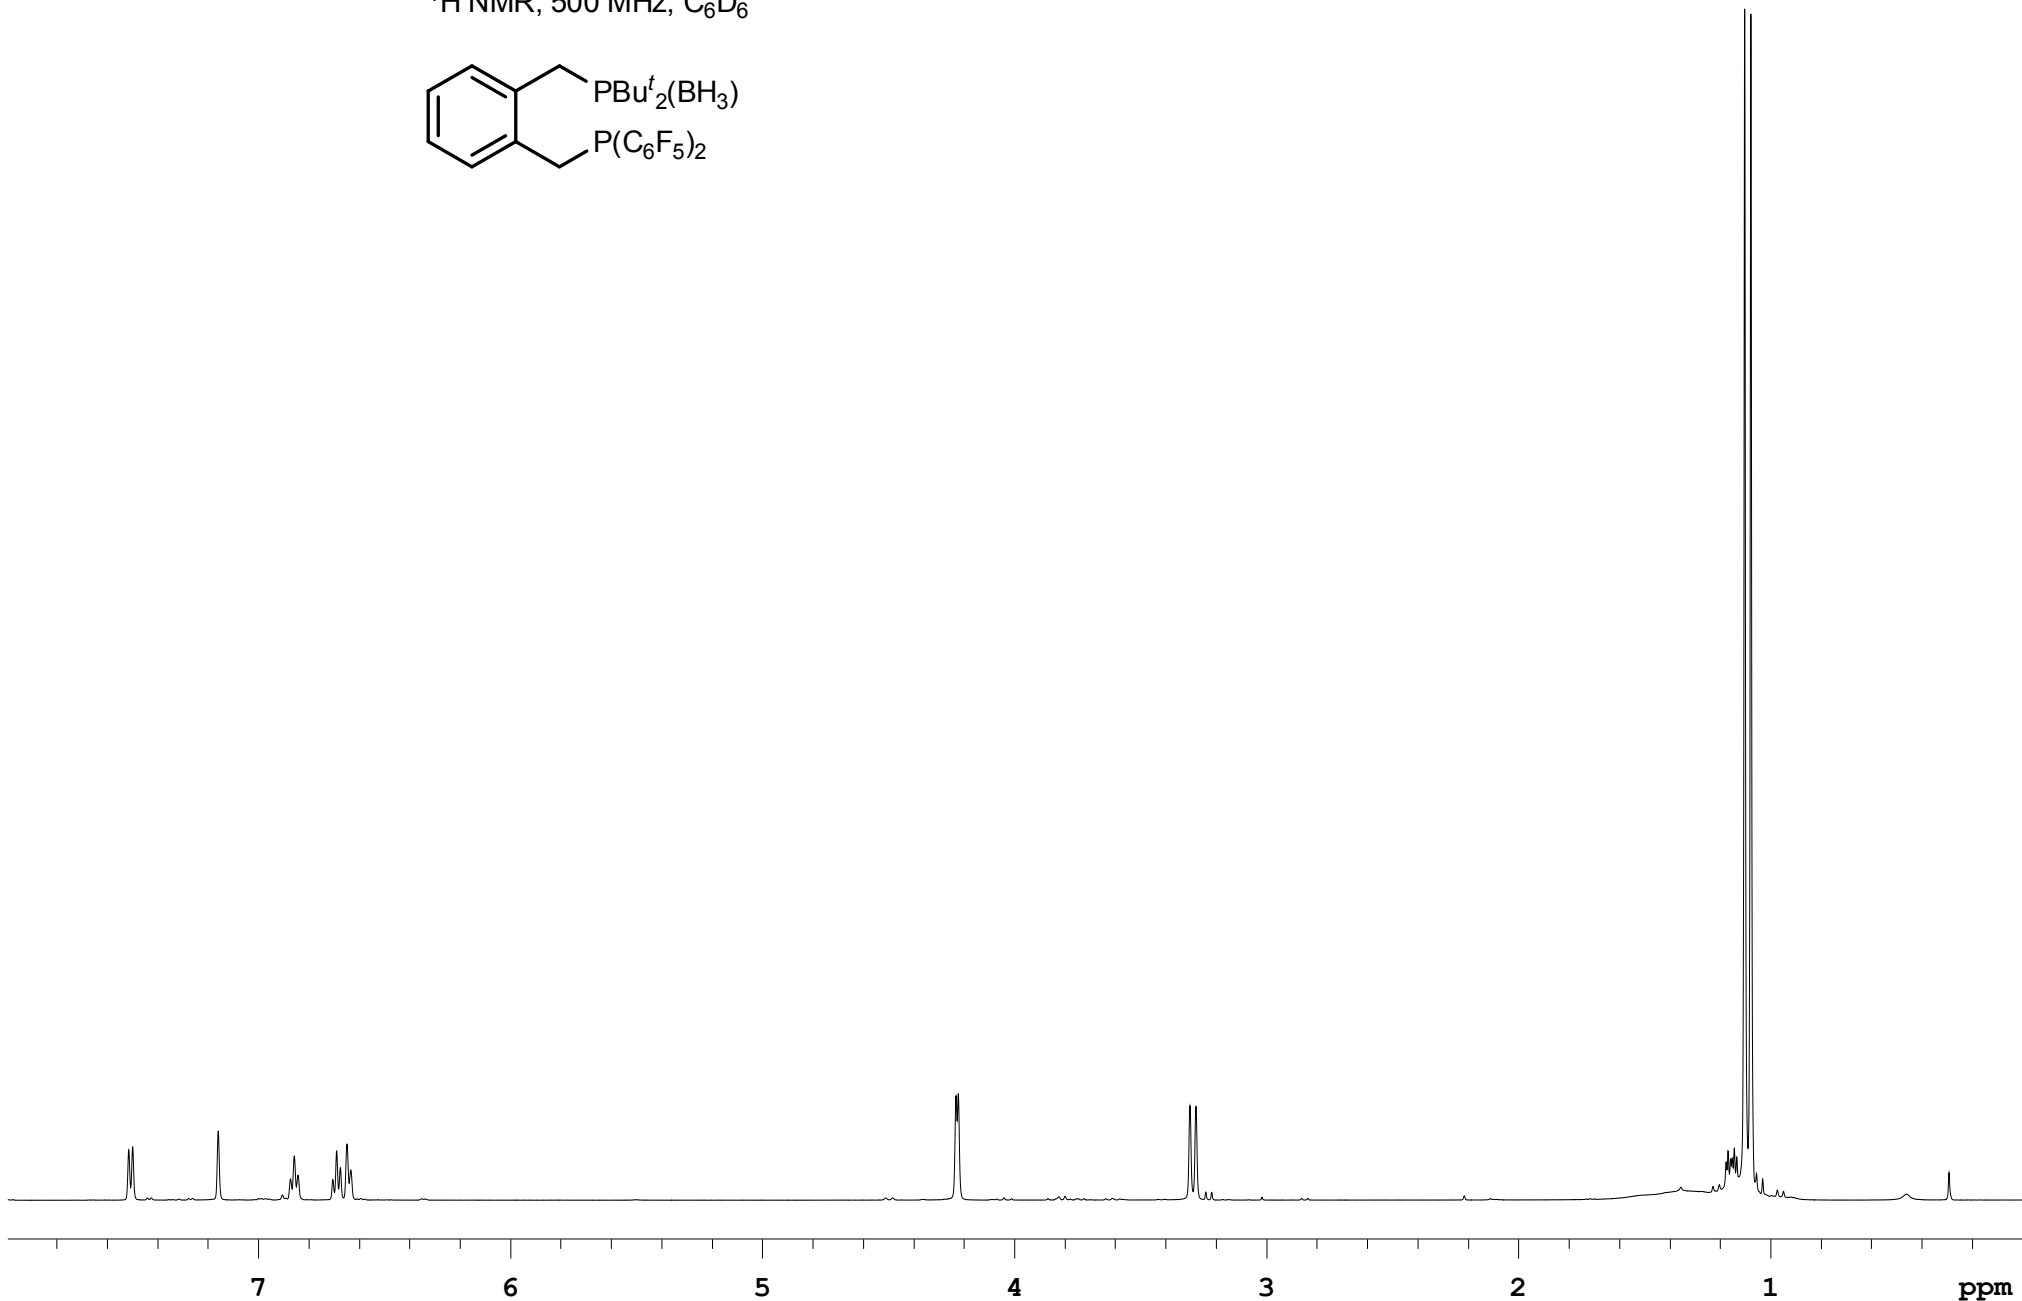

**Compound 4**  
 $^{13}\text{C}$  NMR, 125 MHz,  $\text{C}_6\text{D}_6$

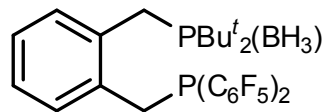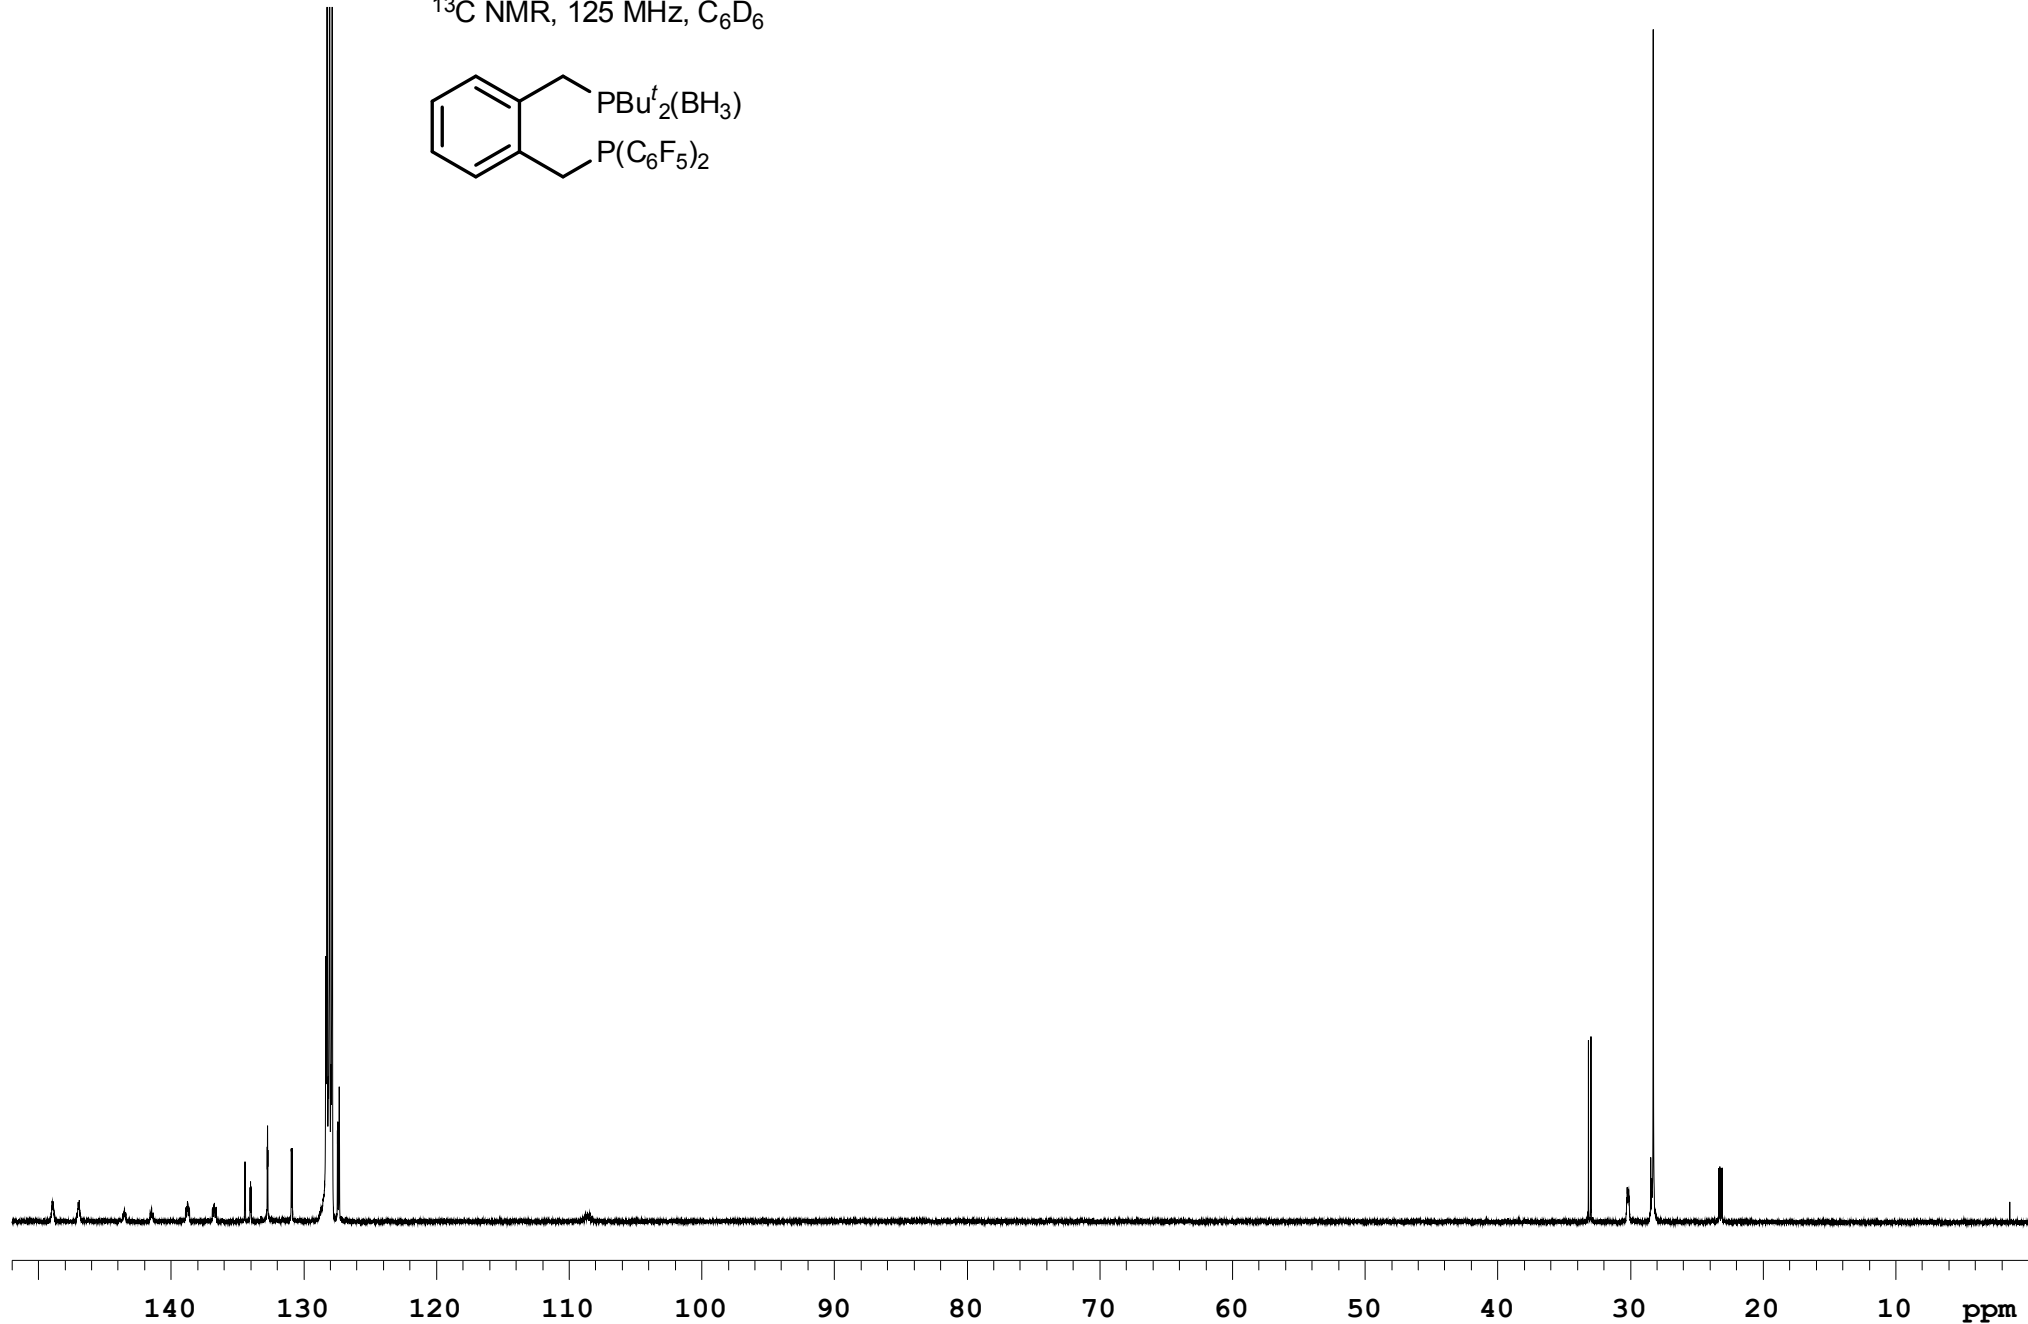

**Compound 5**  
<sup>1</sup>H NMR, 500 MHz, C<sub>6</sub>D<sub>6</sub>

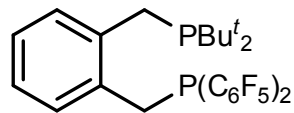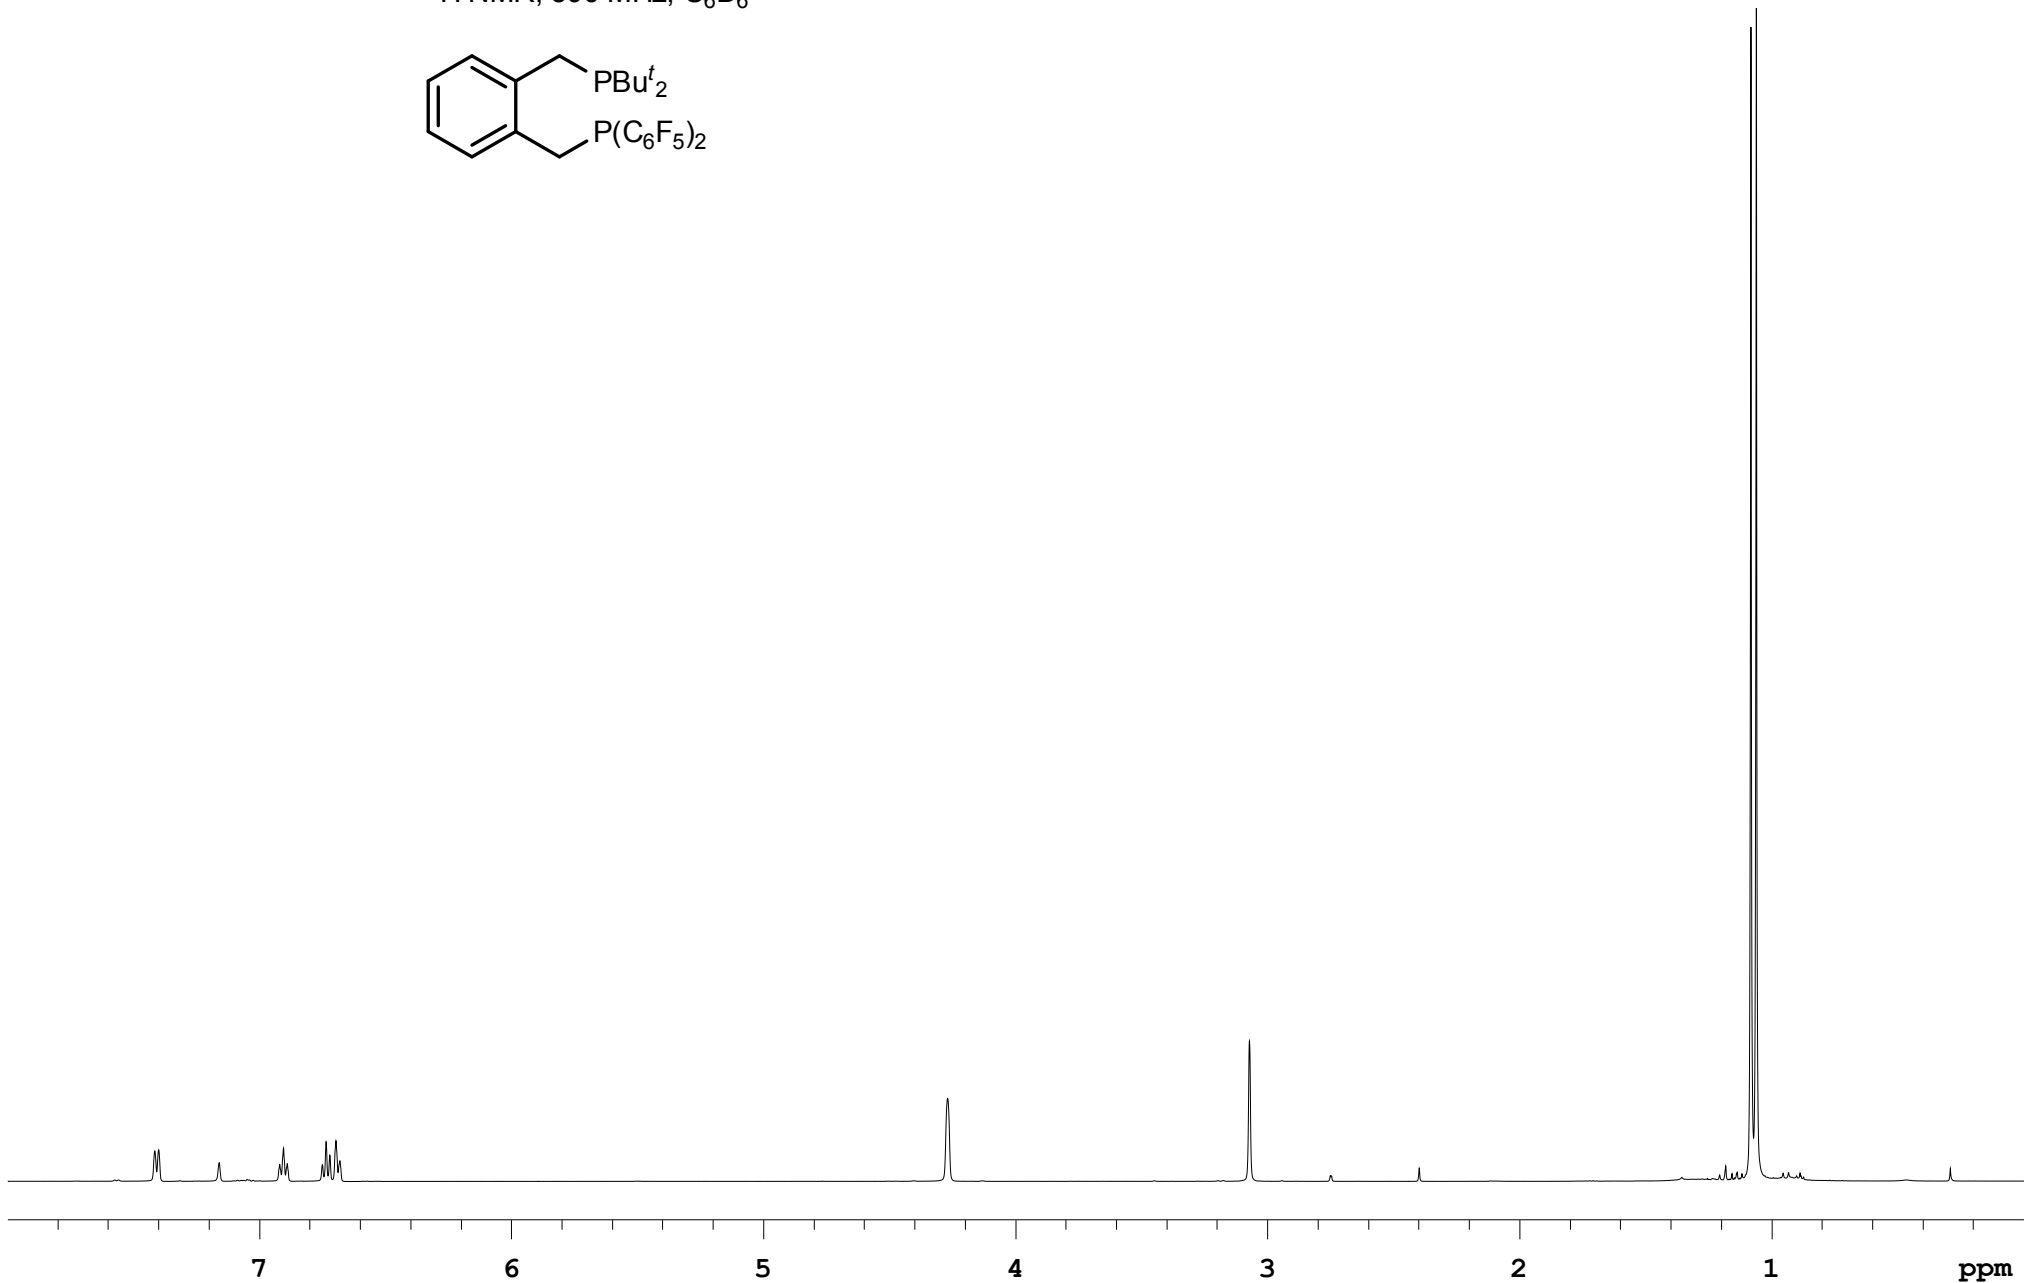

**Compound 5**

$^{13}\text{C}$  NMR, 125 MHz,  $\text{C}_6\text{D}_6$

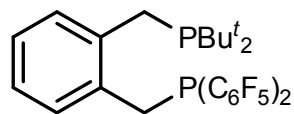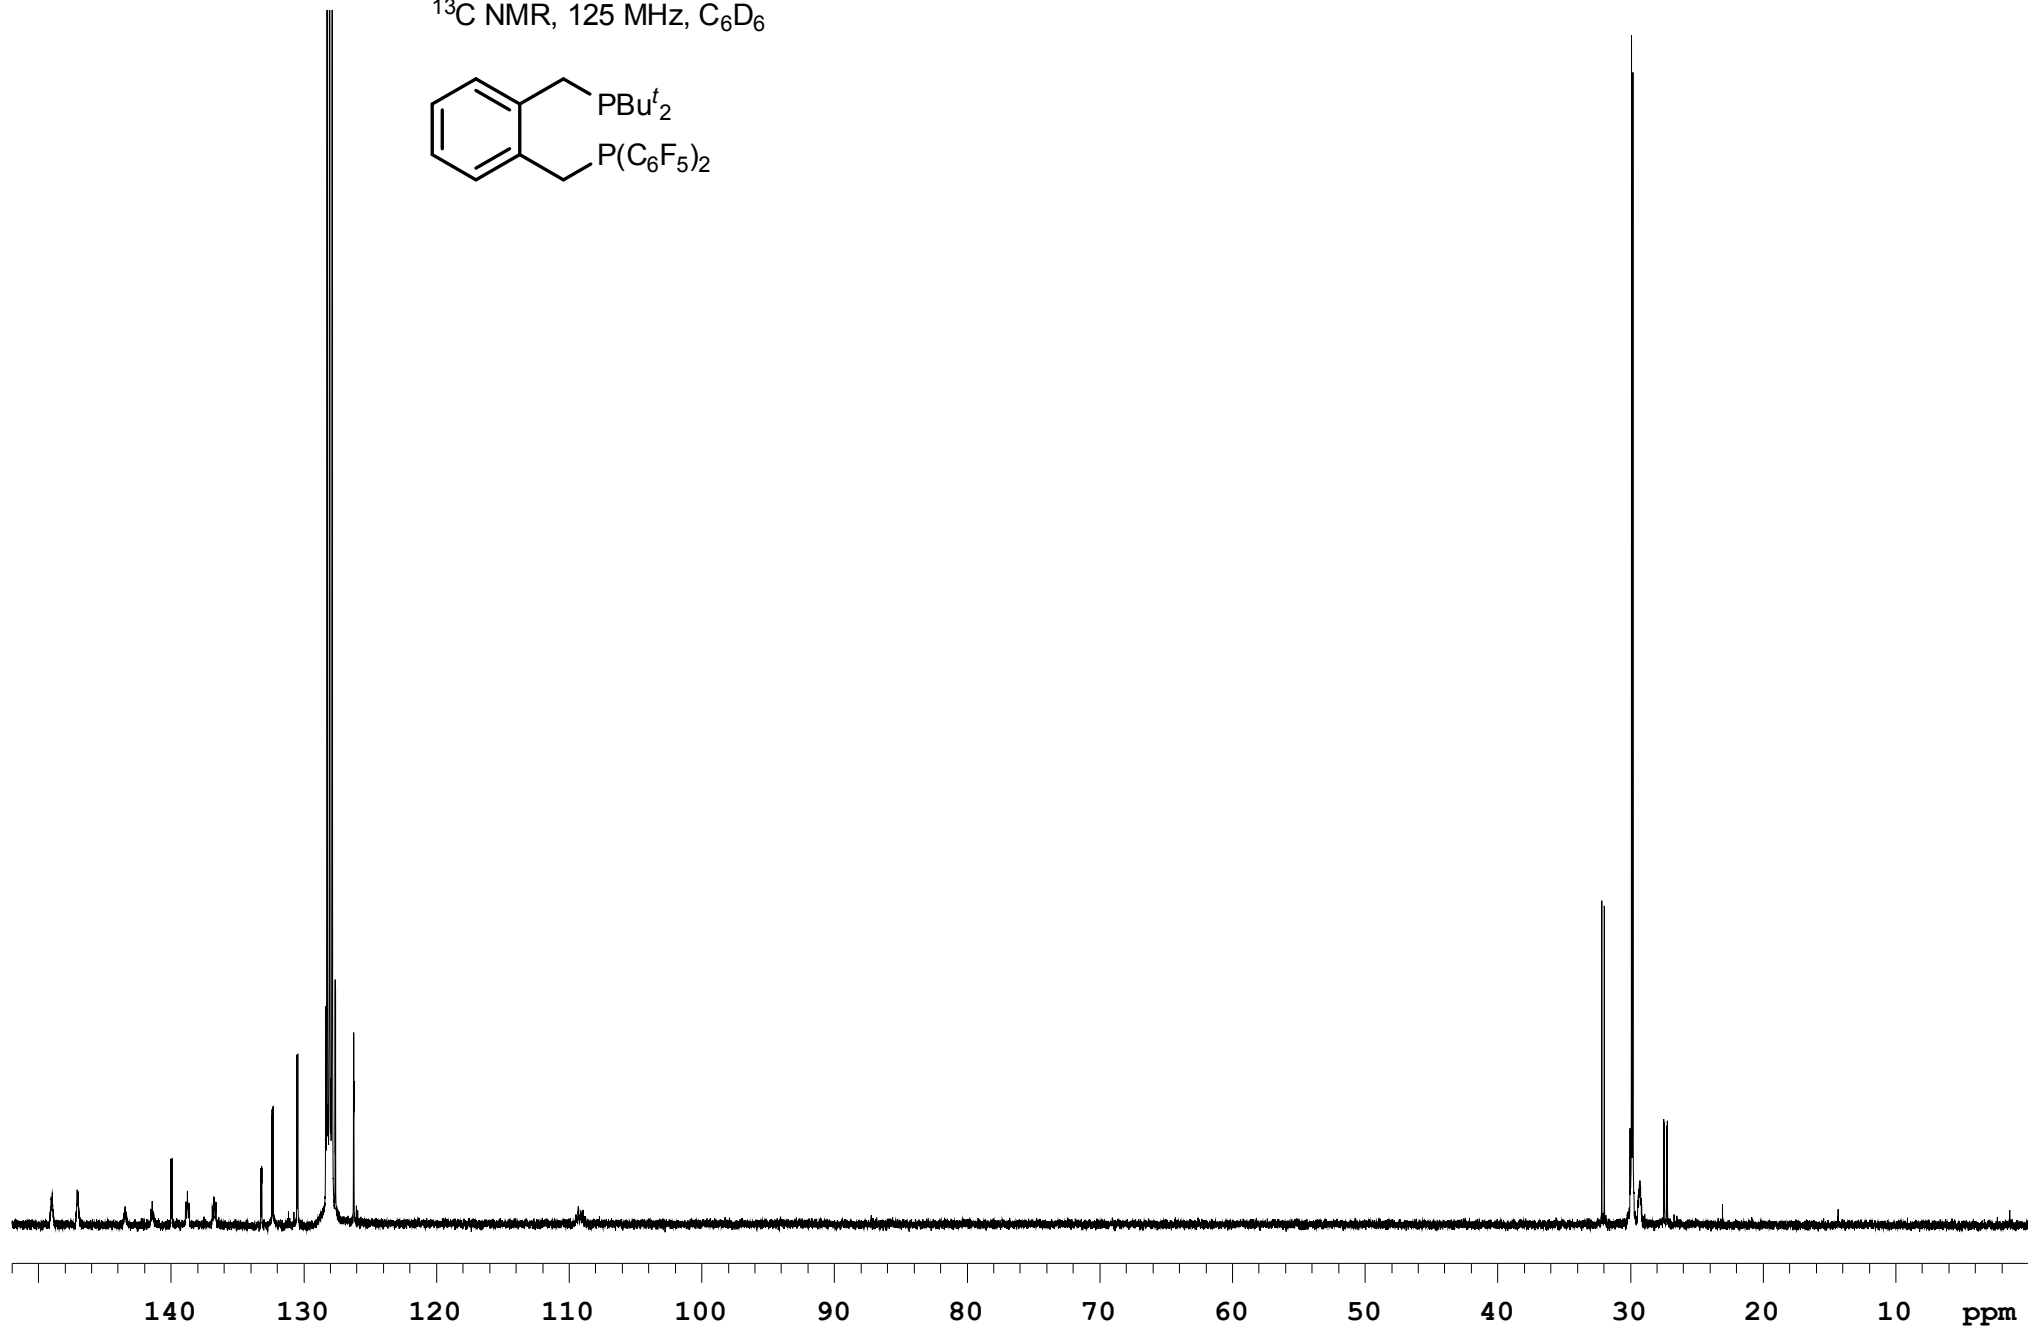



**Compound 6**

<sup>1</sup>H NMR, 500 MHz, C<sub>6</sub>D<sub>6</sub>

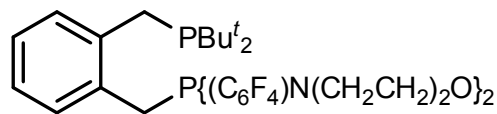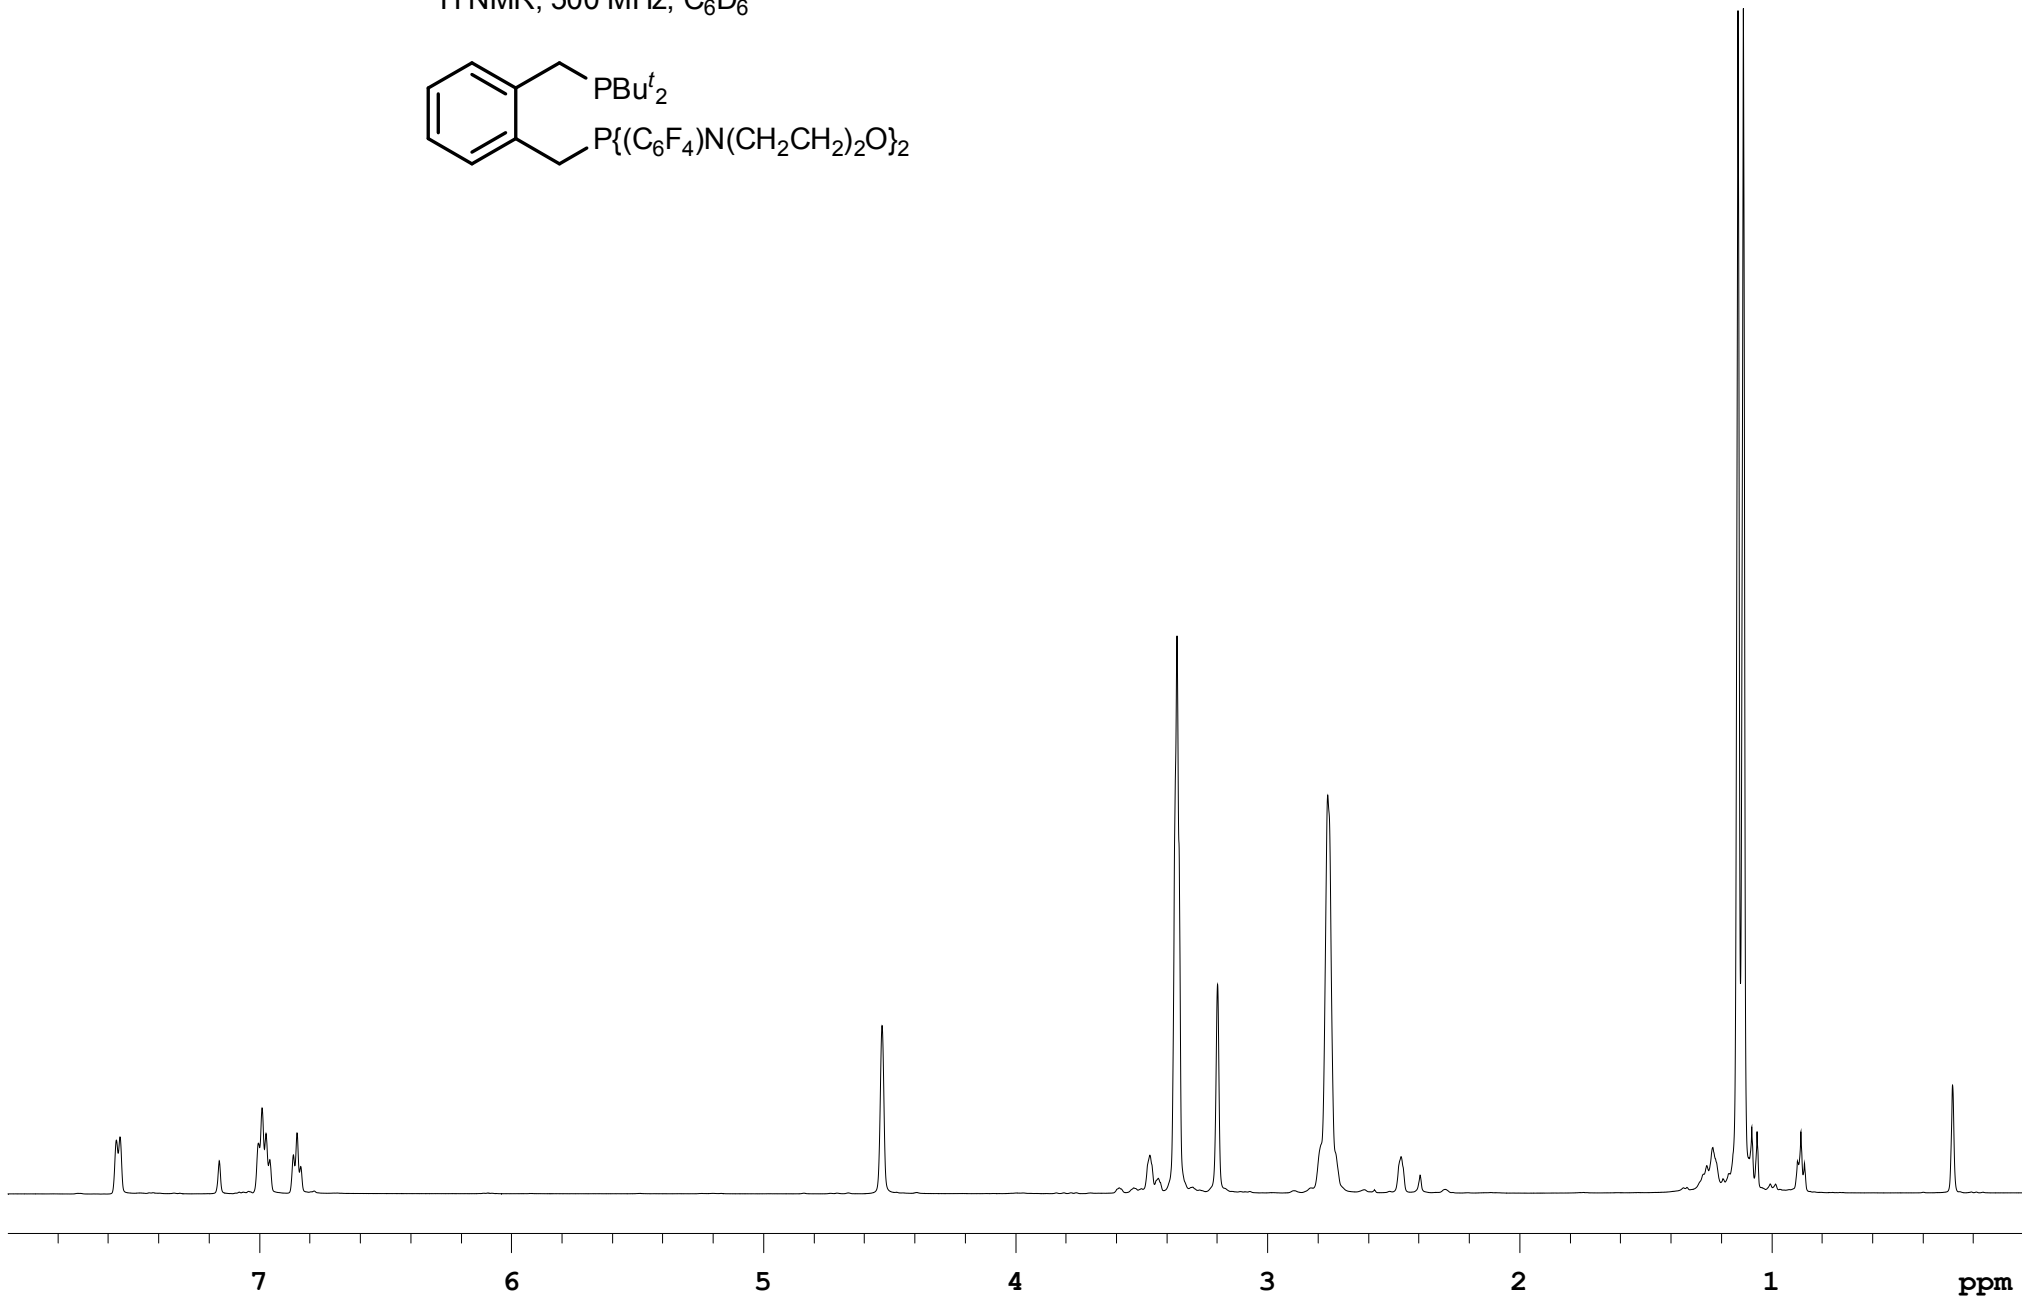

**Compound 6**

<sup>13</sup>C NMR, 125 MHz, C<sub>6</sub>D<sub>6</sub>

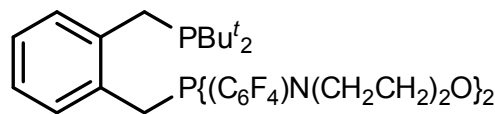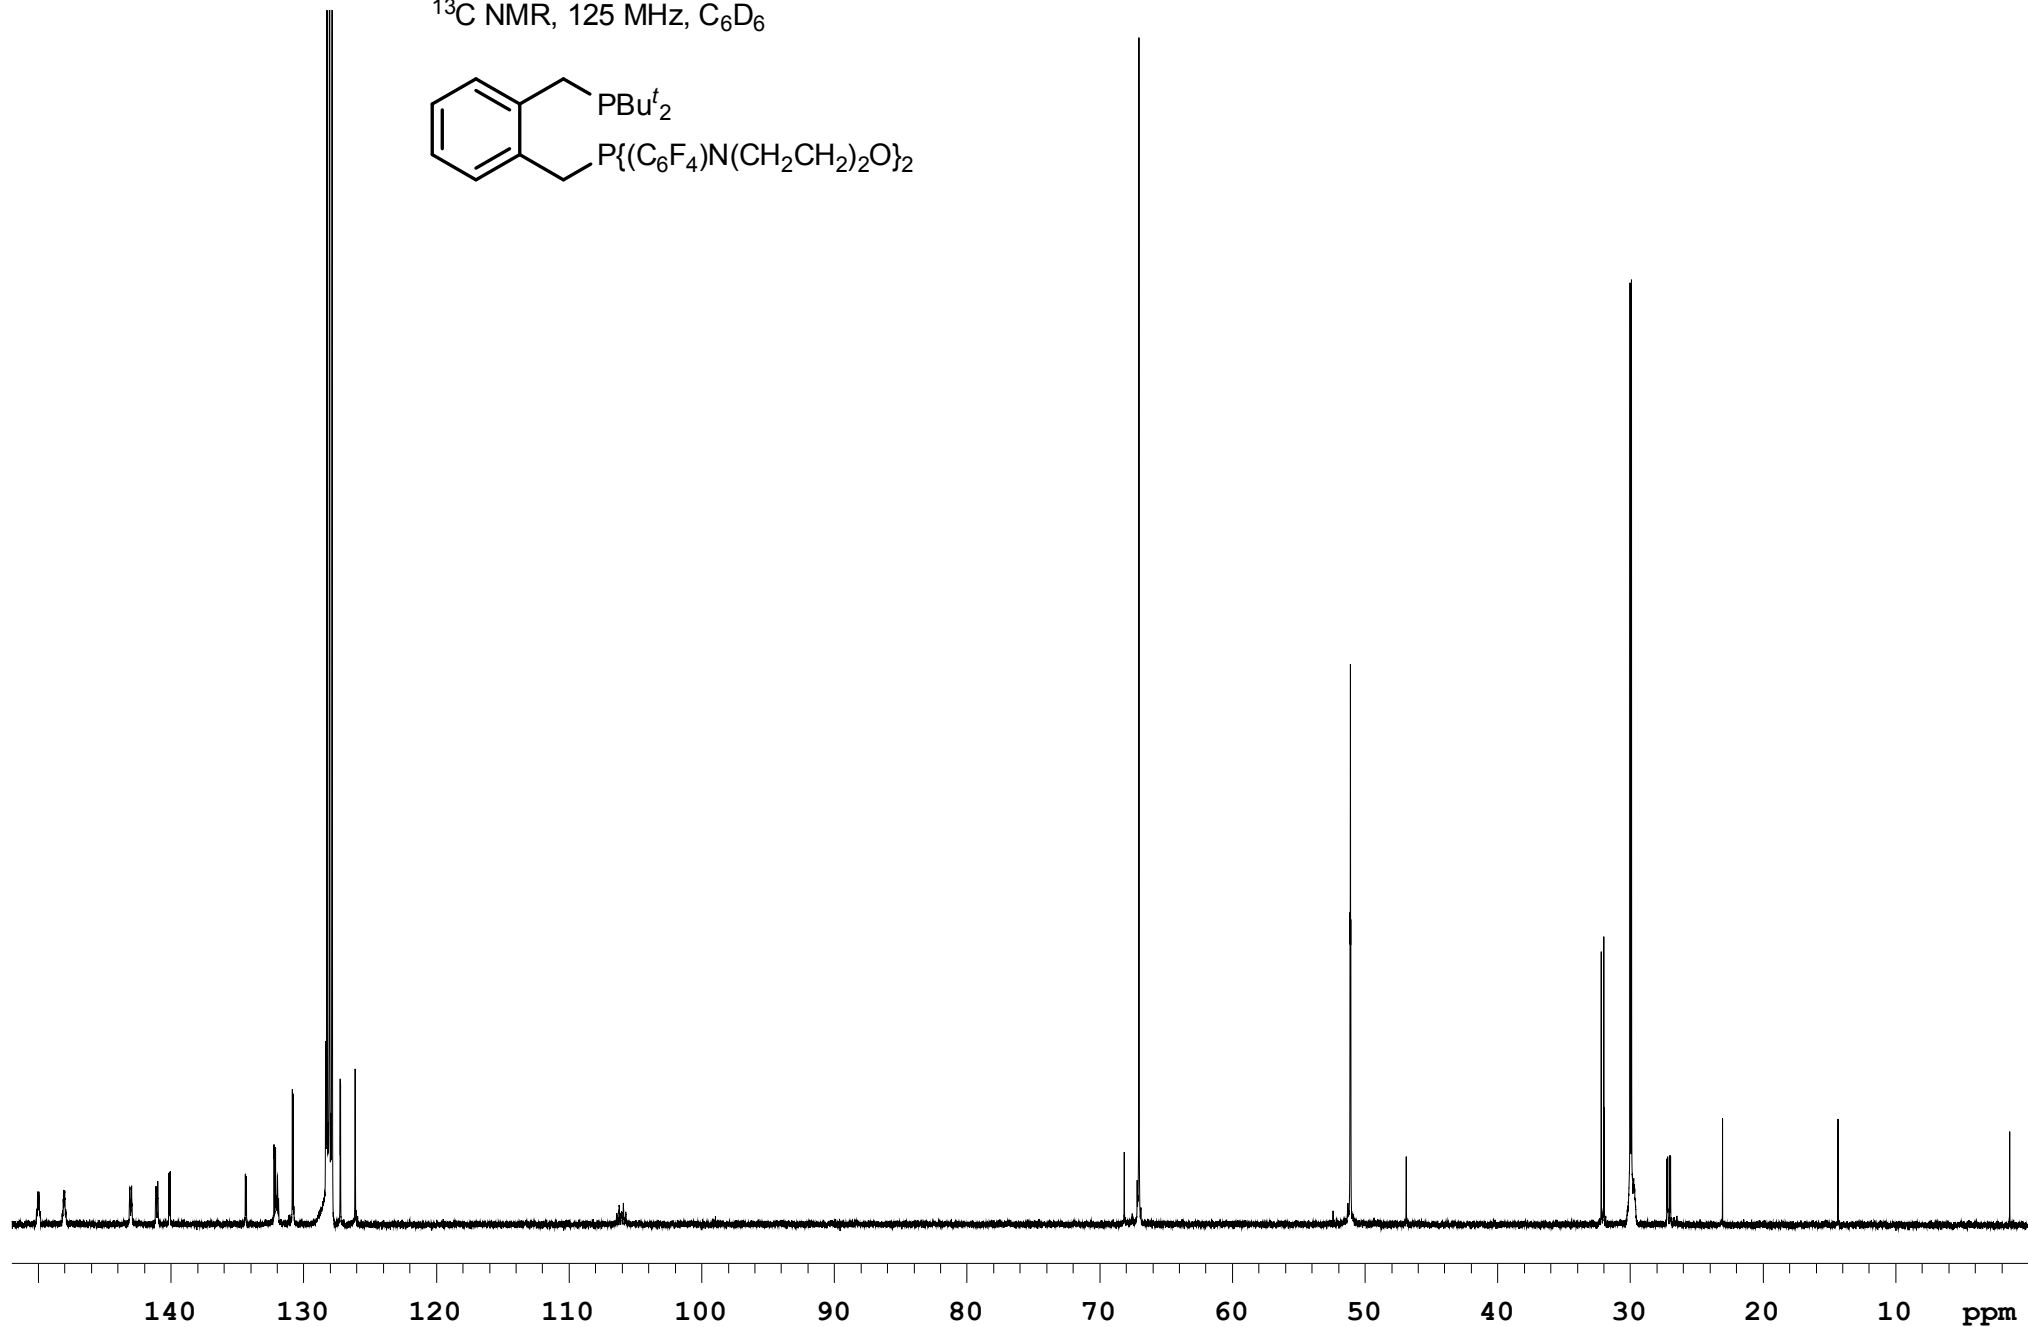

Supplement: c3ob42244e.pdf [file c3ob42244e.pdf]
