# Supplementary material for: Synthesis and characterisation of novel o-xylene-based P,E ligands
Source: Royal Society of Chemistry journal article supplement (doi:10.1039/c3ob42244e), 2013-12-13

**Compound 10**  
 $^1\text{H}$  NMR, 500 MHz,  $\text{C}_6\text{D}_6$

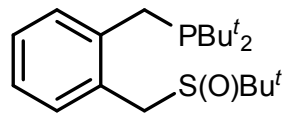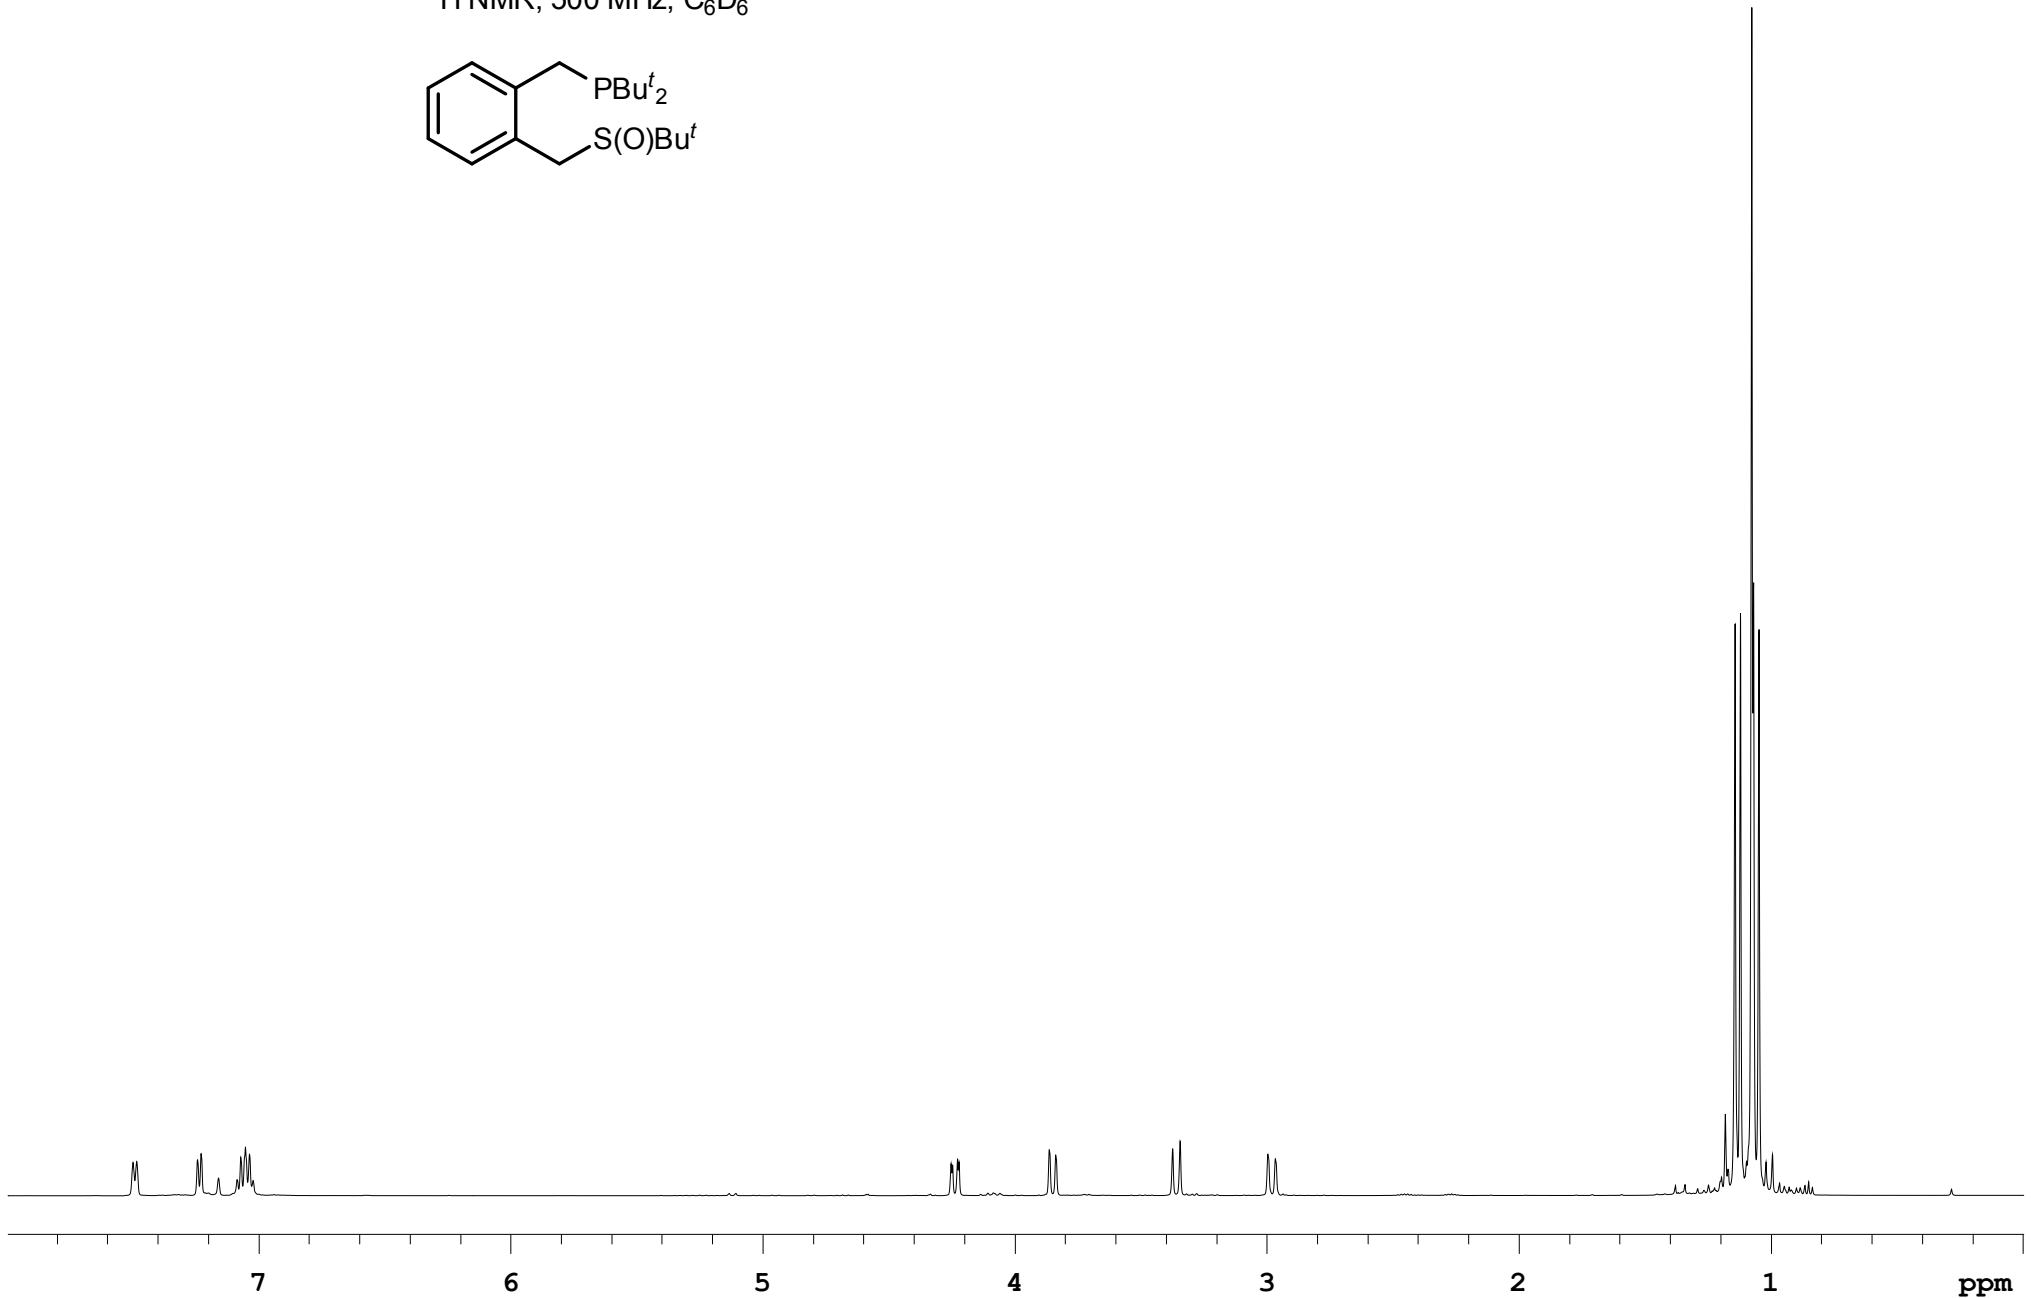

**Compound 10**  
<sup>13</sup>C NMR, 125 MHz, C<sub>6</sub>D<sub>6</sub>

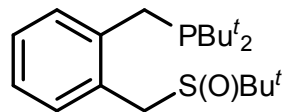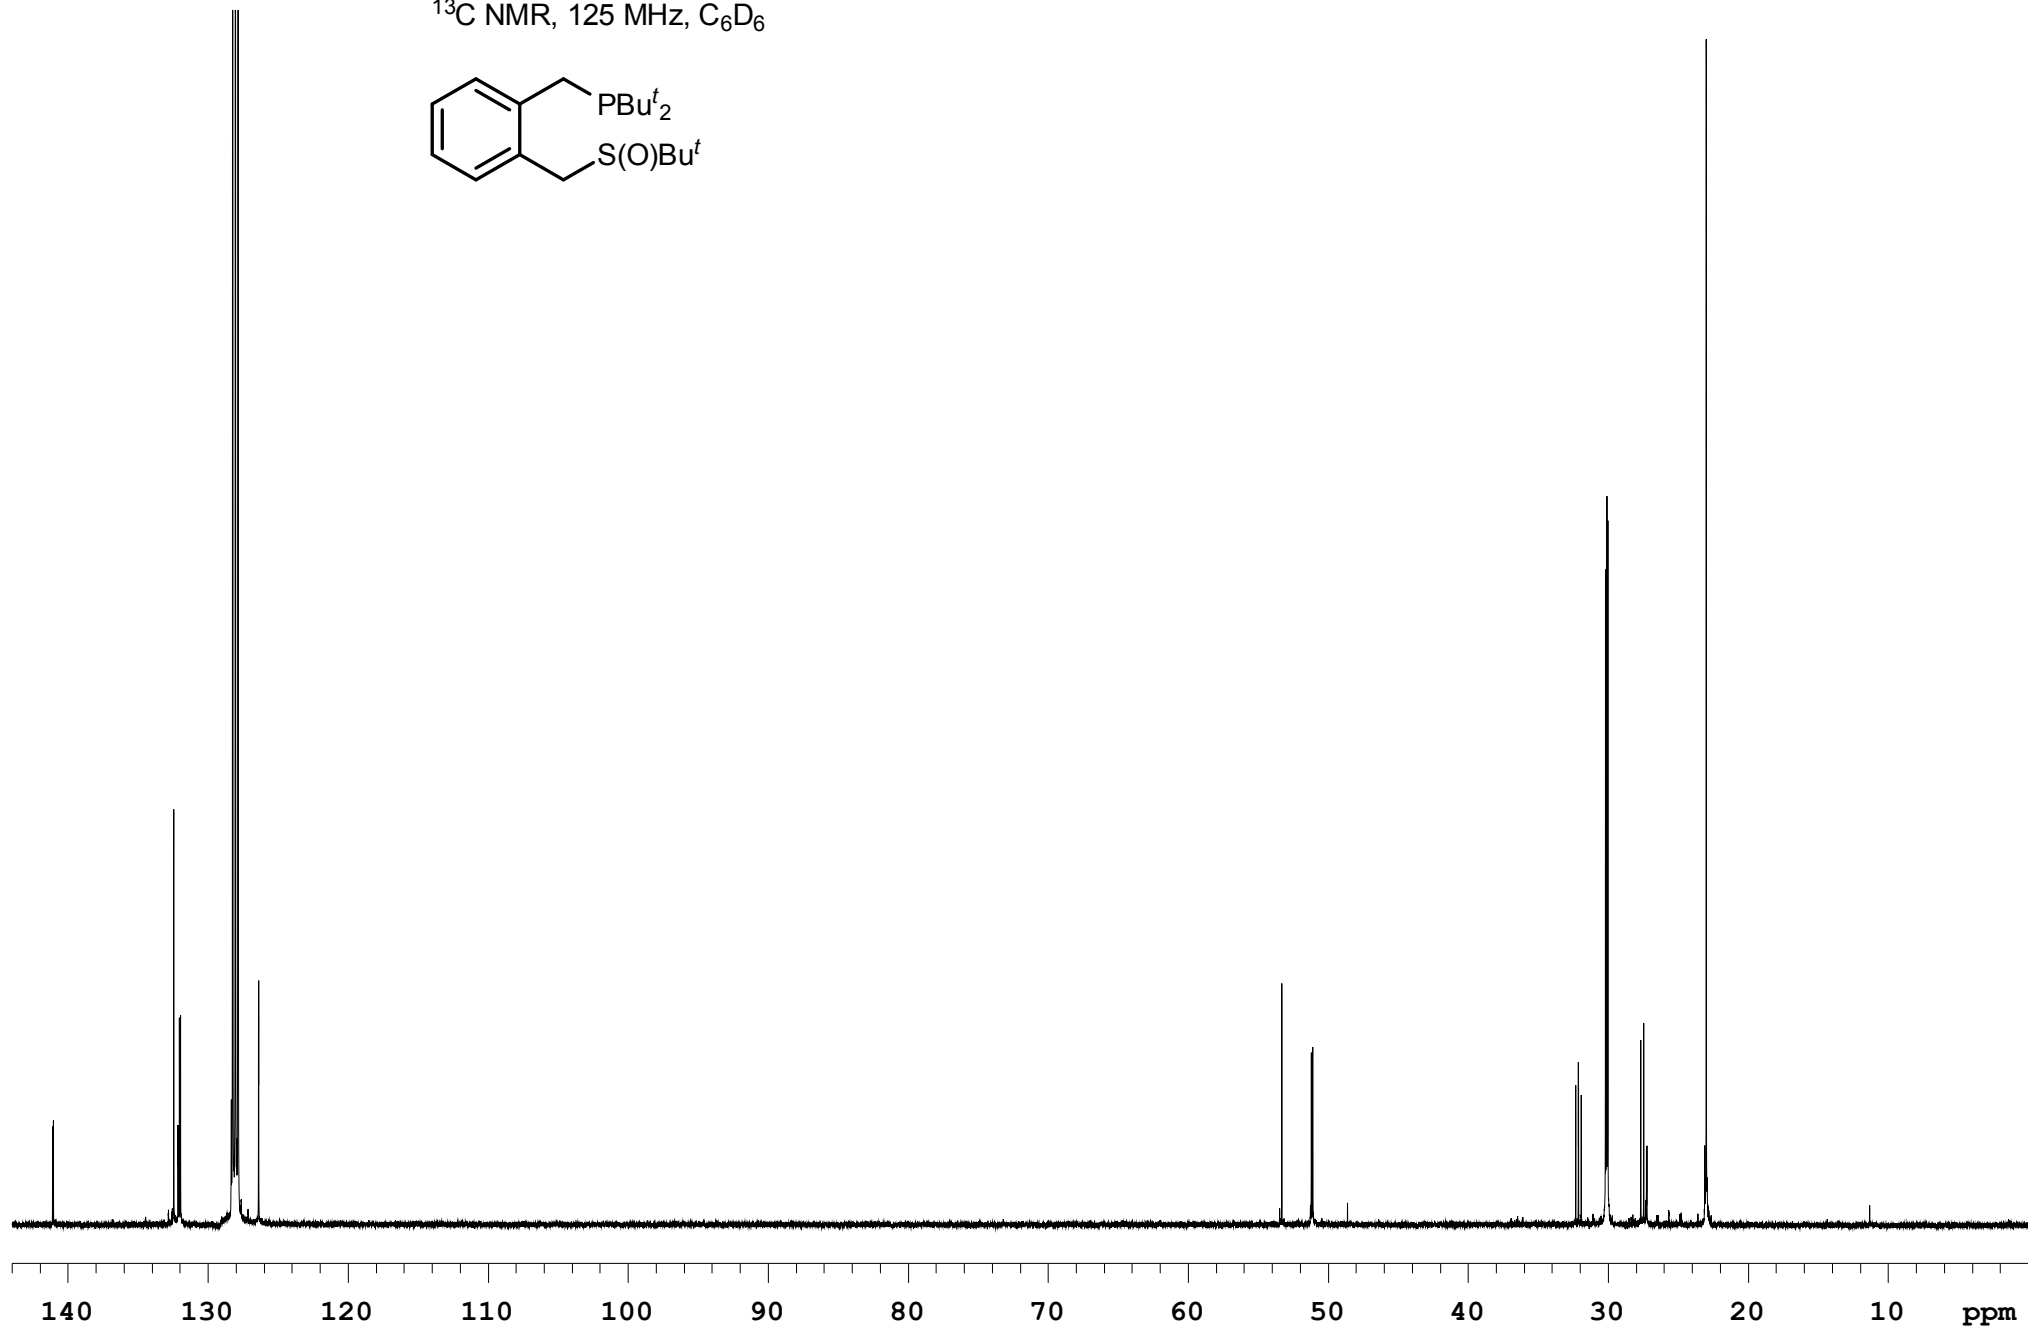

**Compound 11a**  
<sup>1</sup>H NMR, 500 MHz, C<sub>6</sub>D<sub>6</sub>

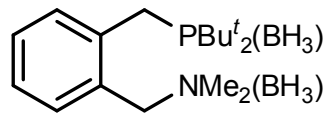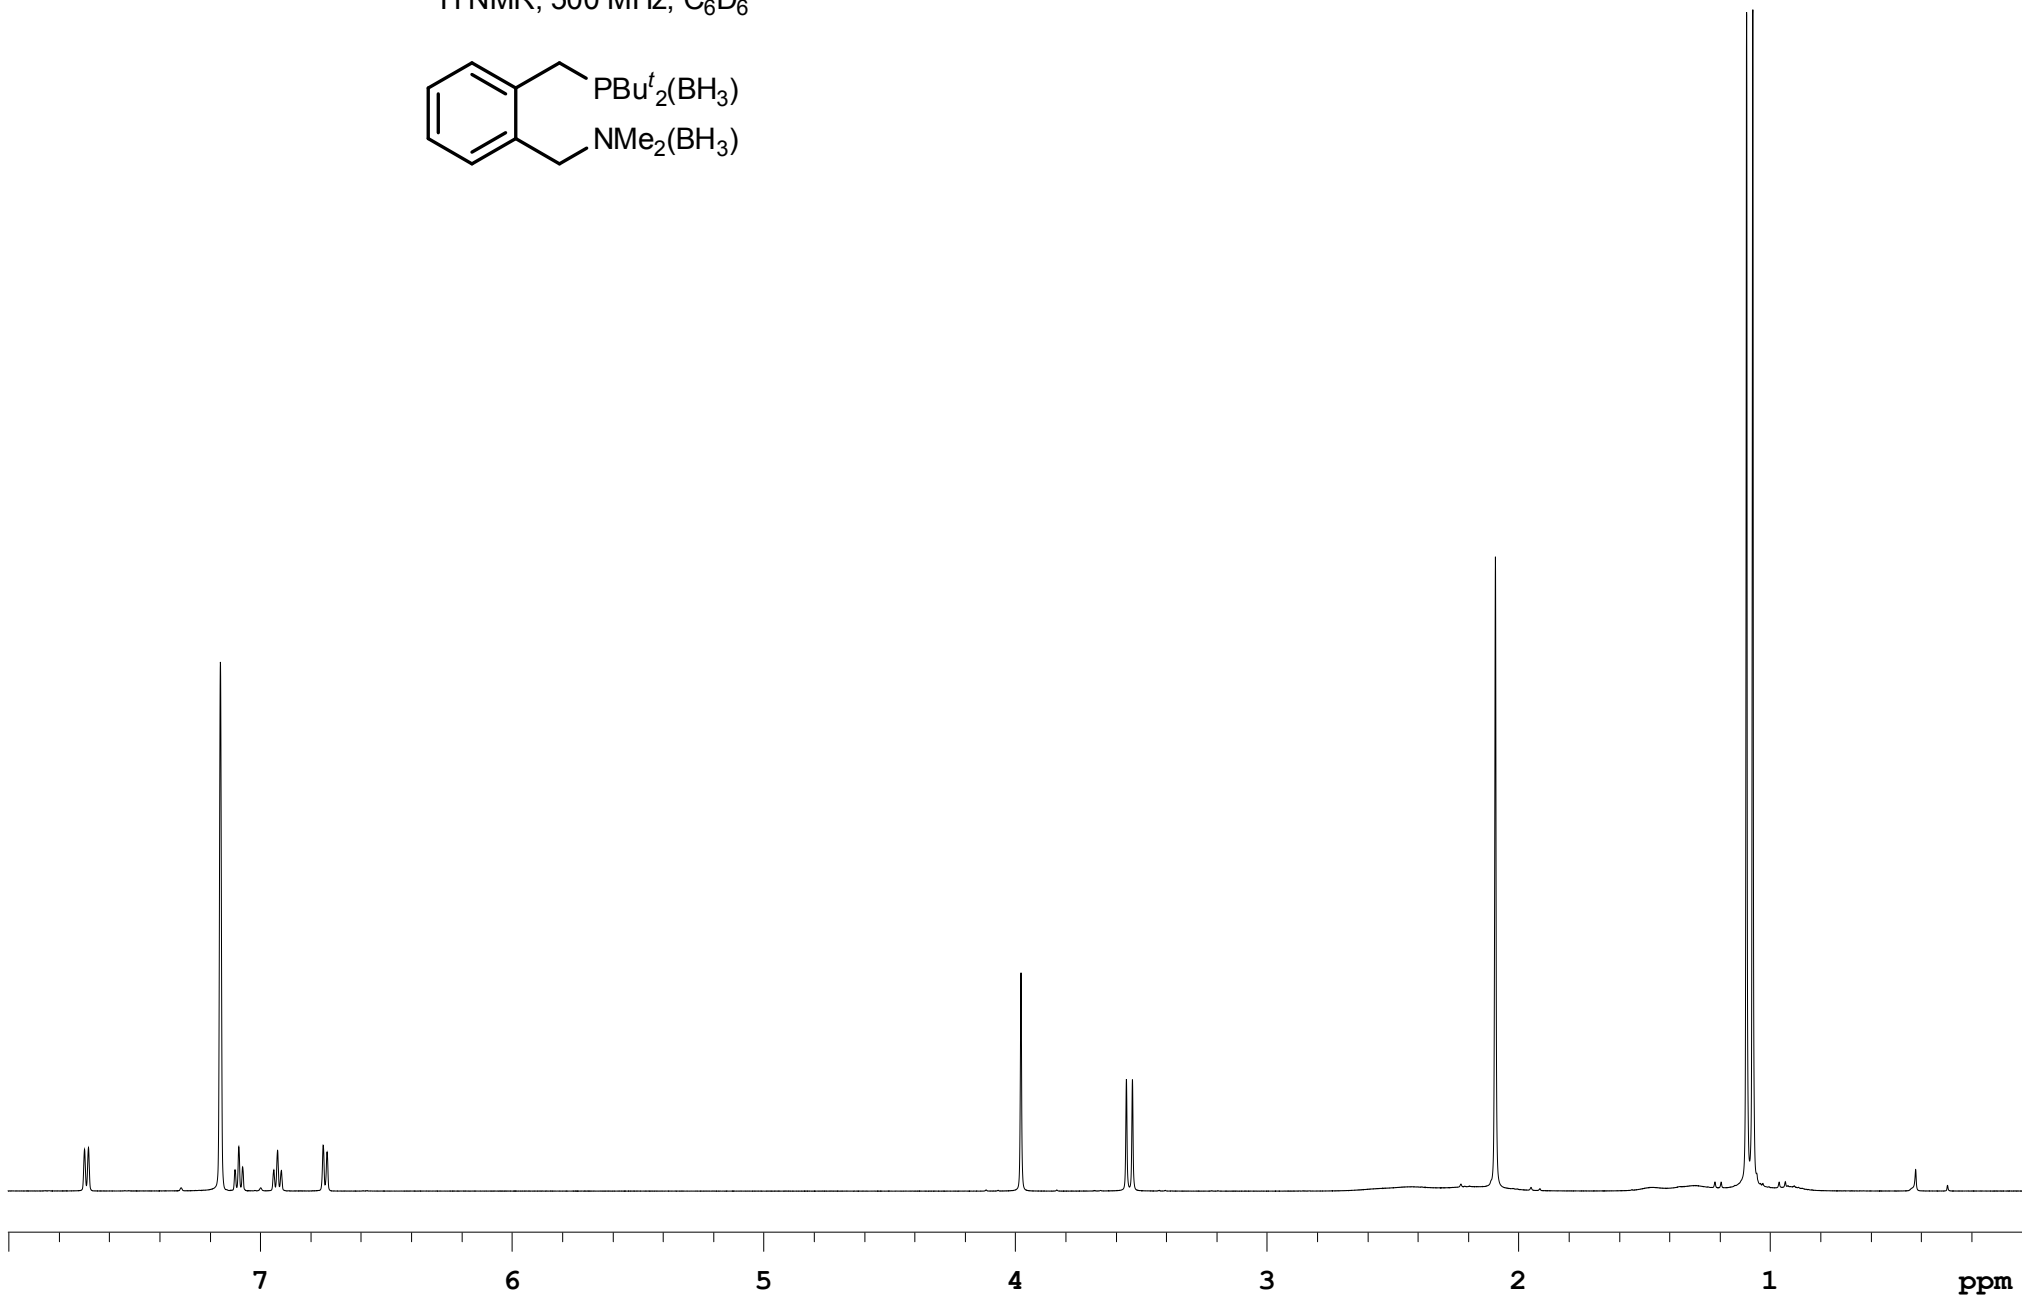

**Compound 11a**  
<sup>13</sup>C NMR, 125 MHz, C<sub>6</sub>D<sub>6</sub>

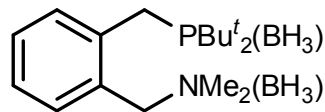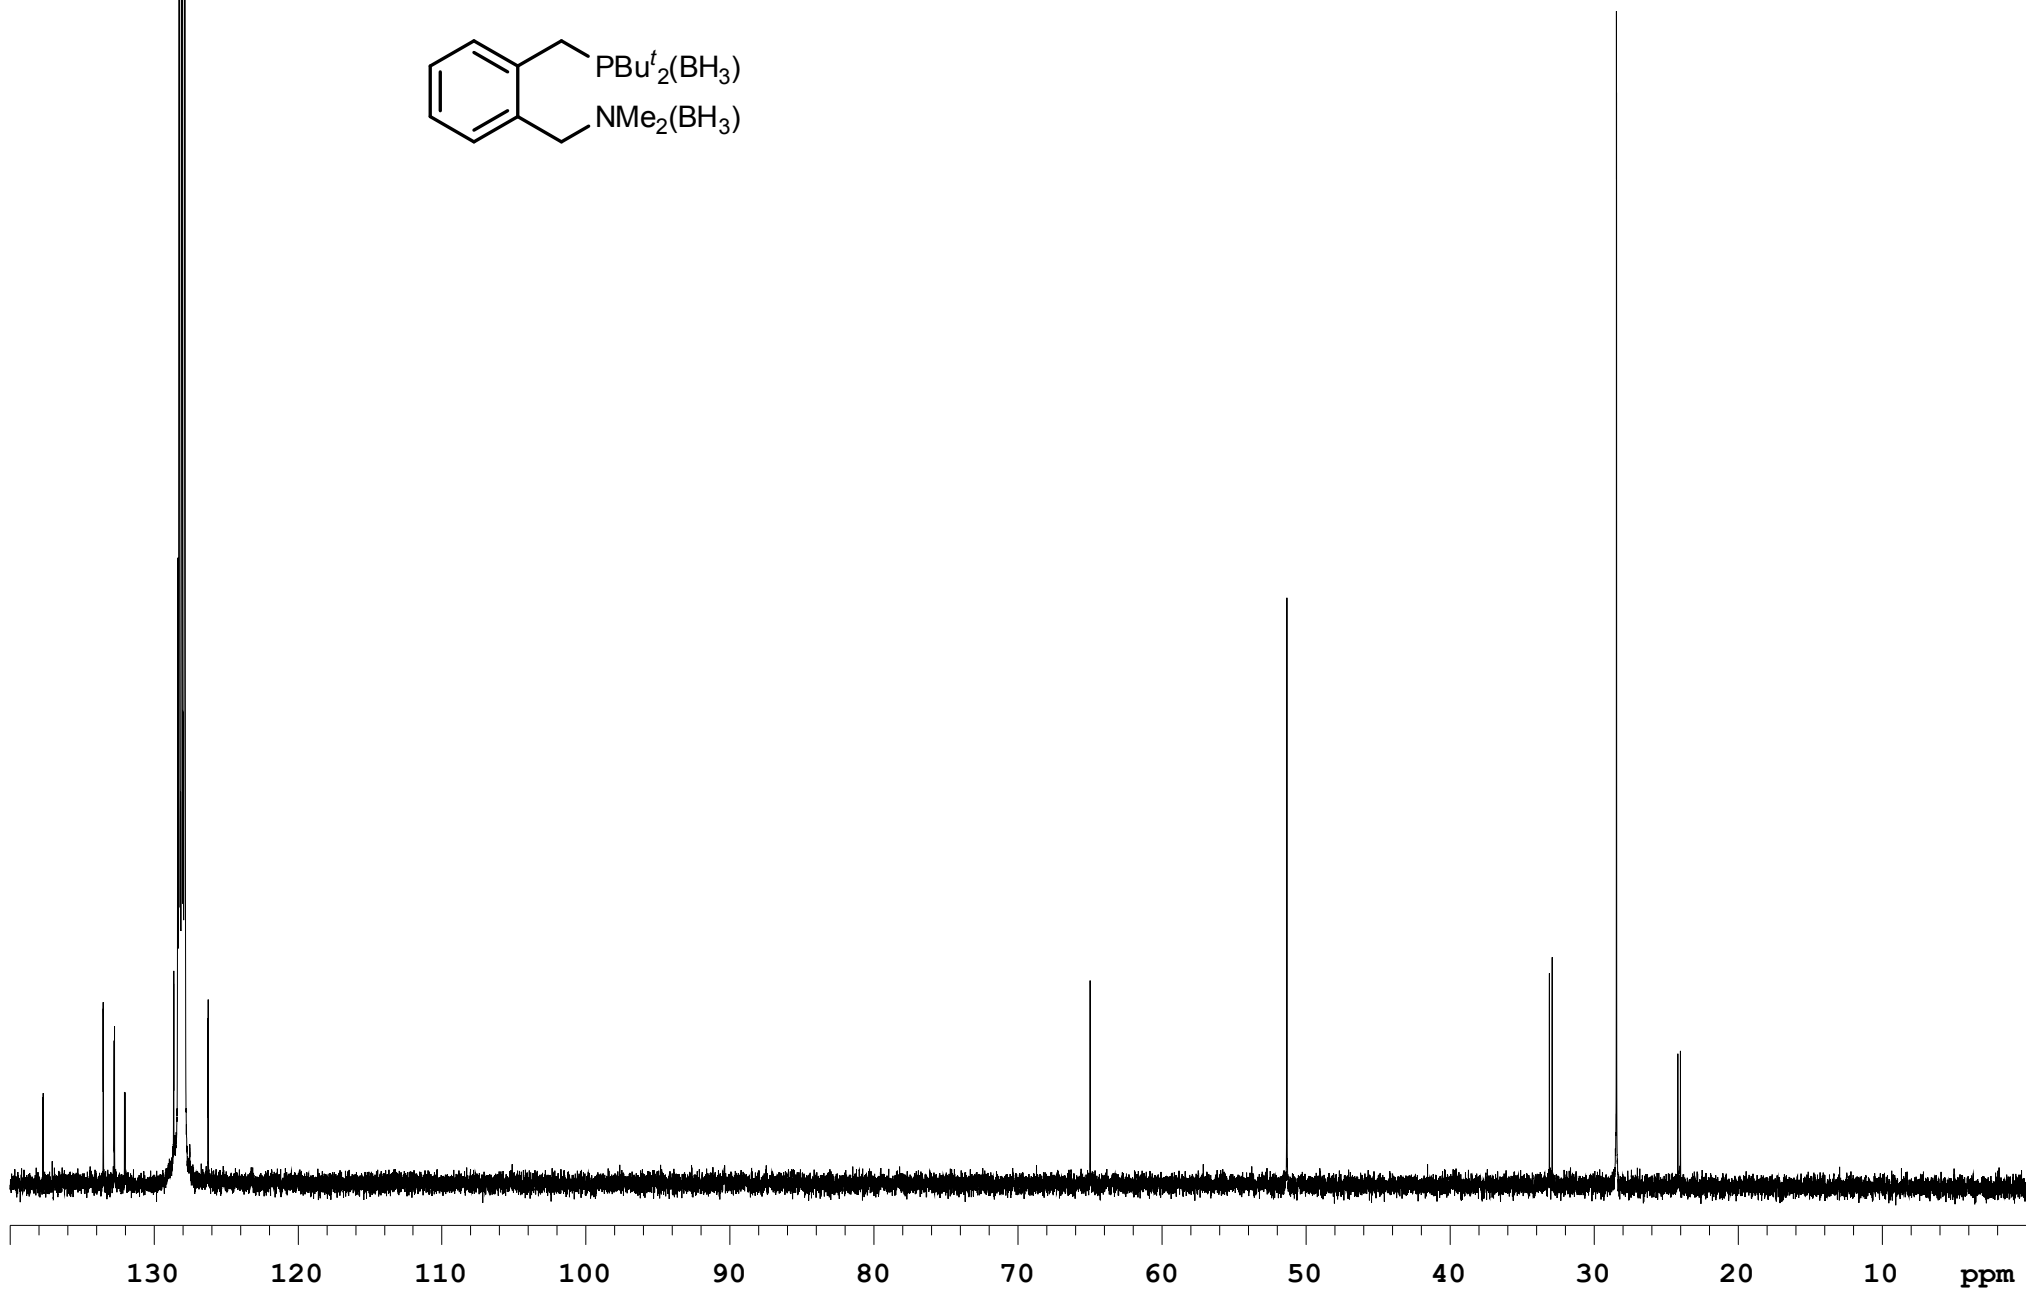

### Compound 11b

<sup>1</sup>H NMR, 500 MHz, C<sub>6</sub>D<sub>6</sub>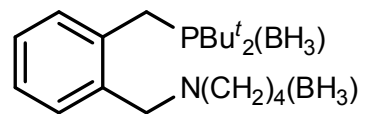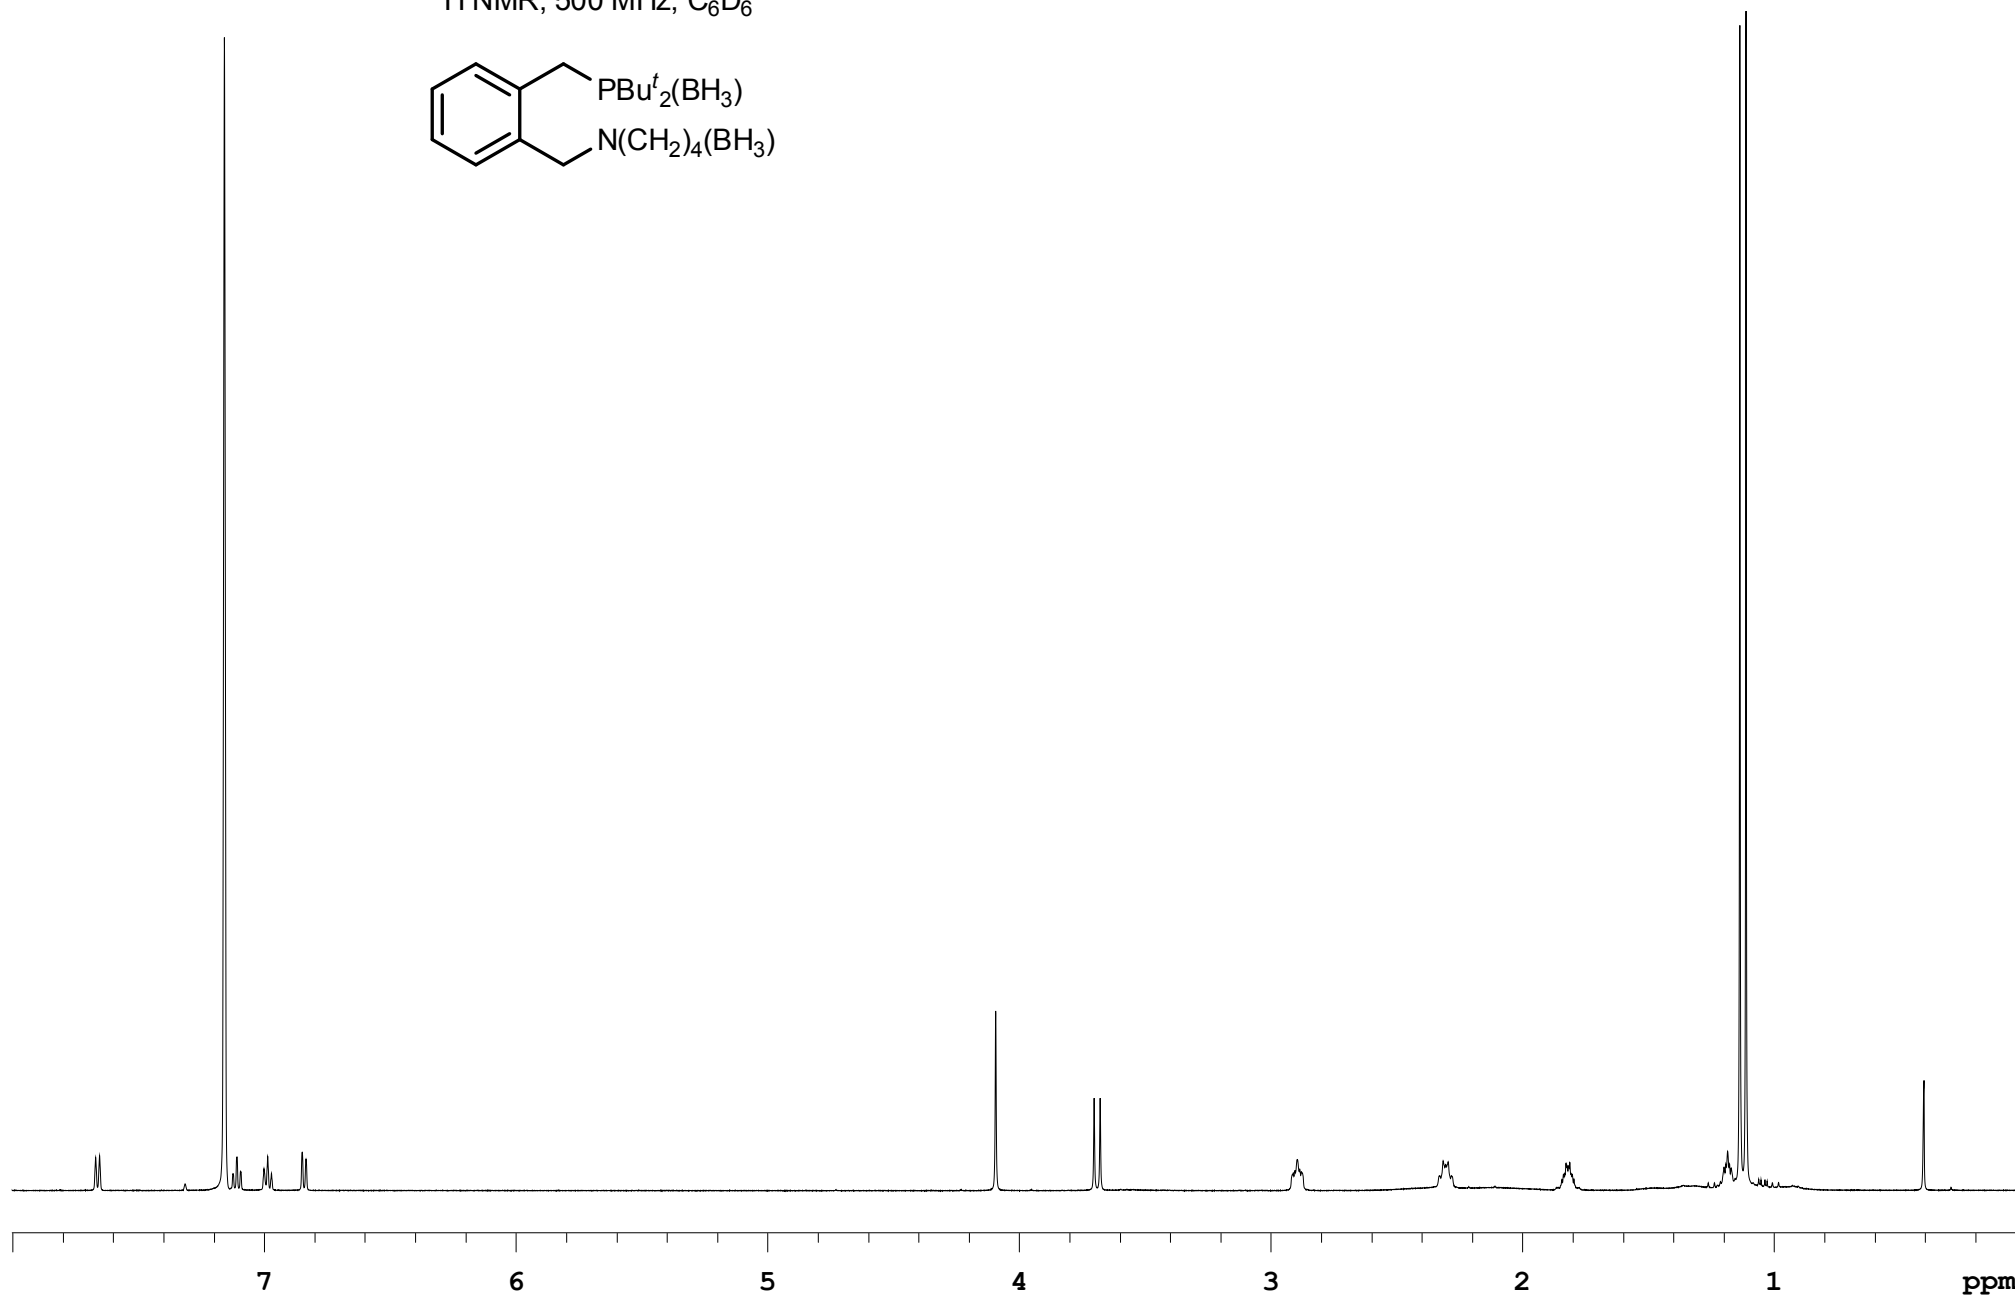

### Compound 11b

<sup>13</sup>C NMR, 125 MHz, C<sub>6</sub>D<sub>6</sub>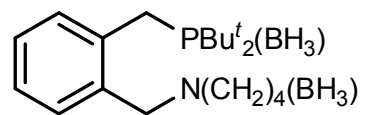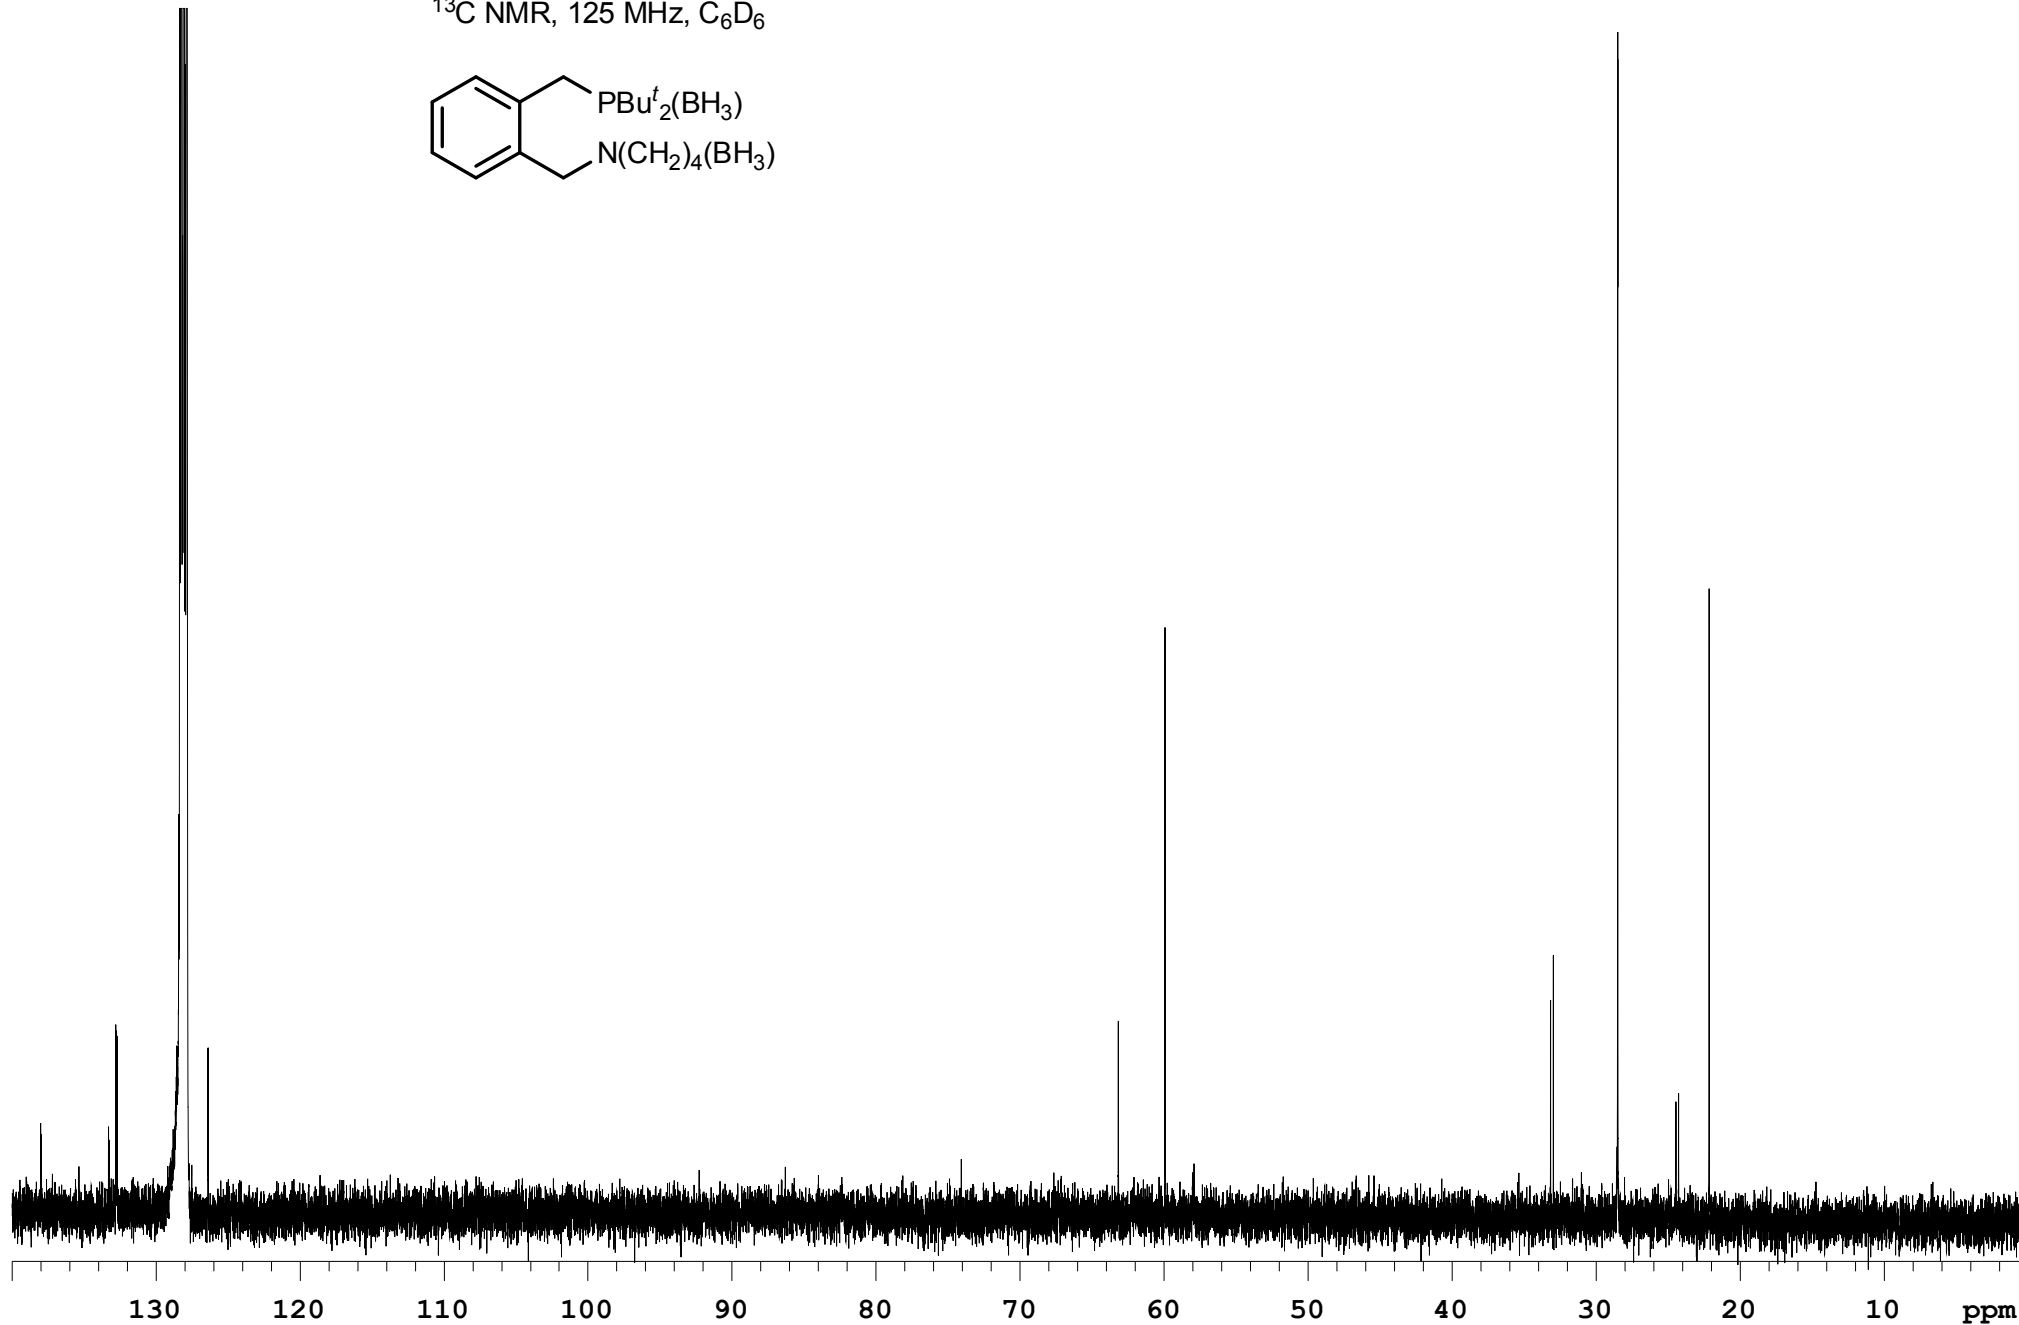

**Compound 11c**  
<sup>1</sup>H NMR, 500 MHz, C<sub>6</sub>D<sub>6</sub>

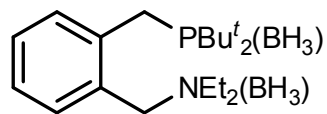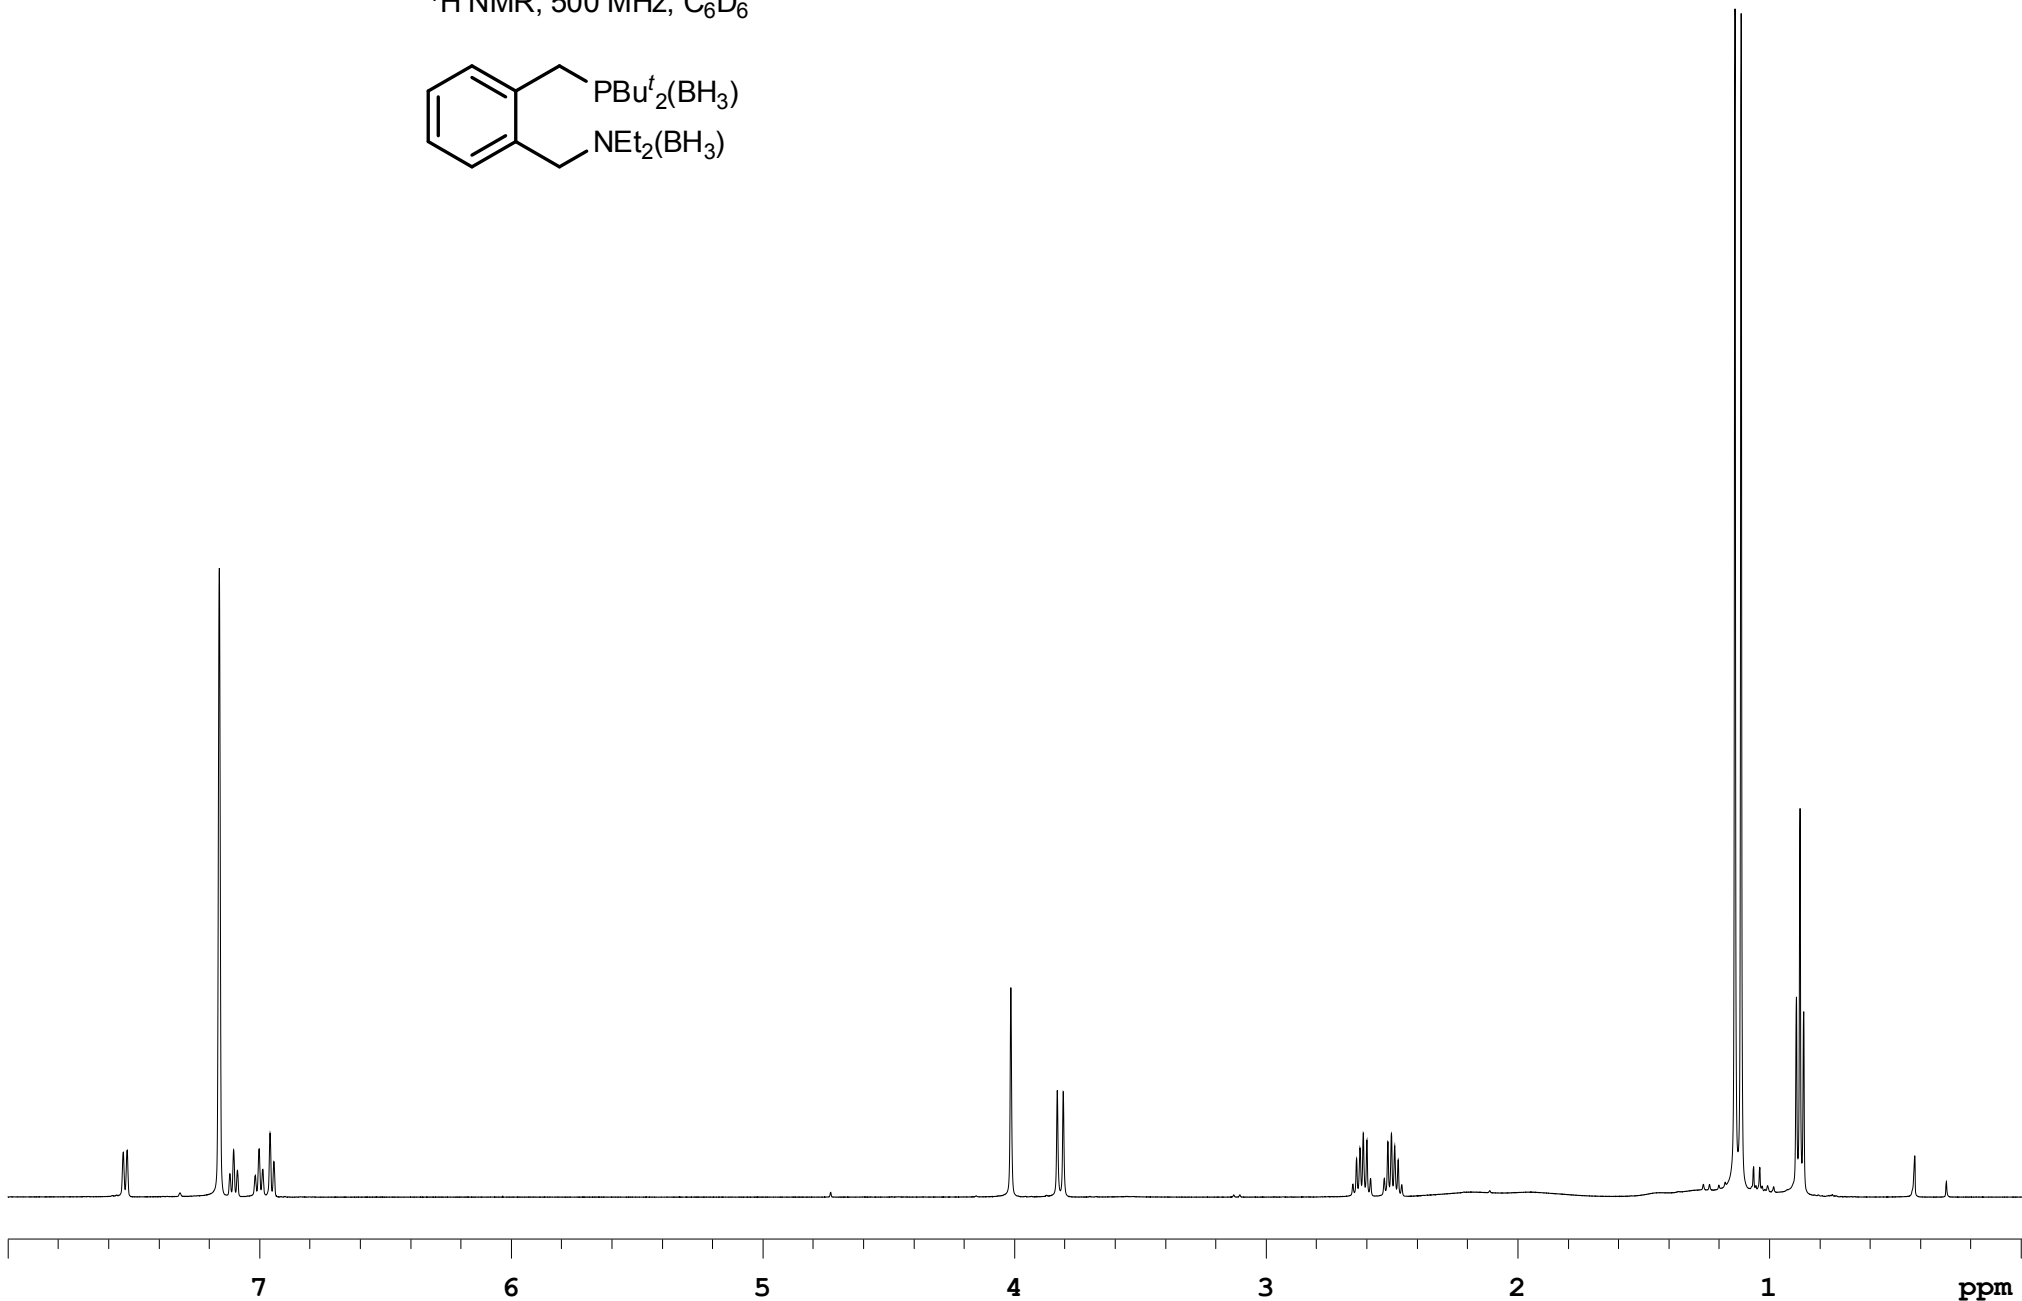

**Compound 11c**  
 $^{13}\text{C}$  NMR, 125 MHz,  $\text{C}_6\text{D}_6$

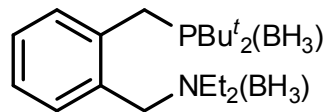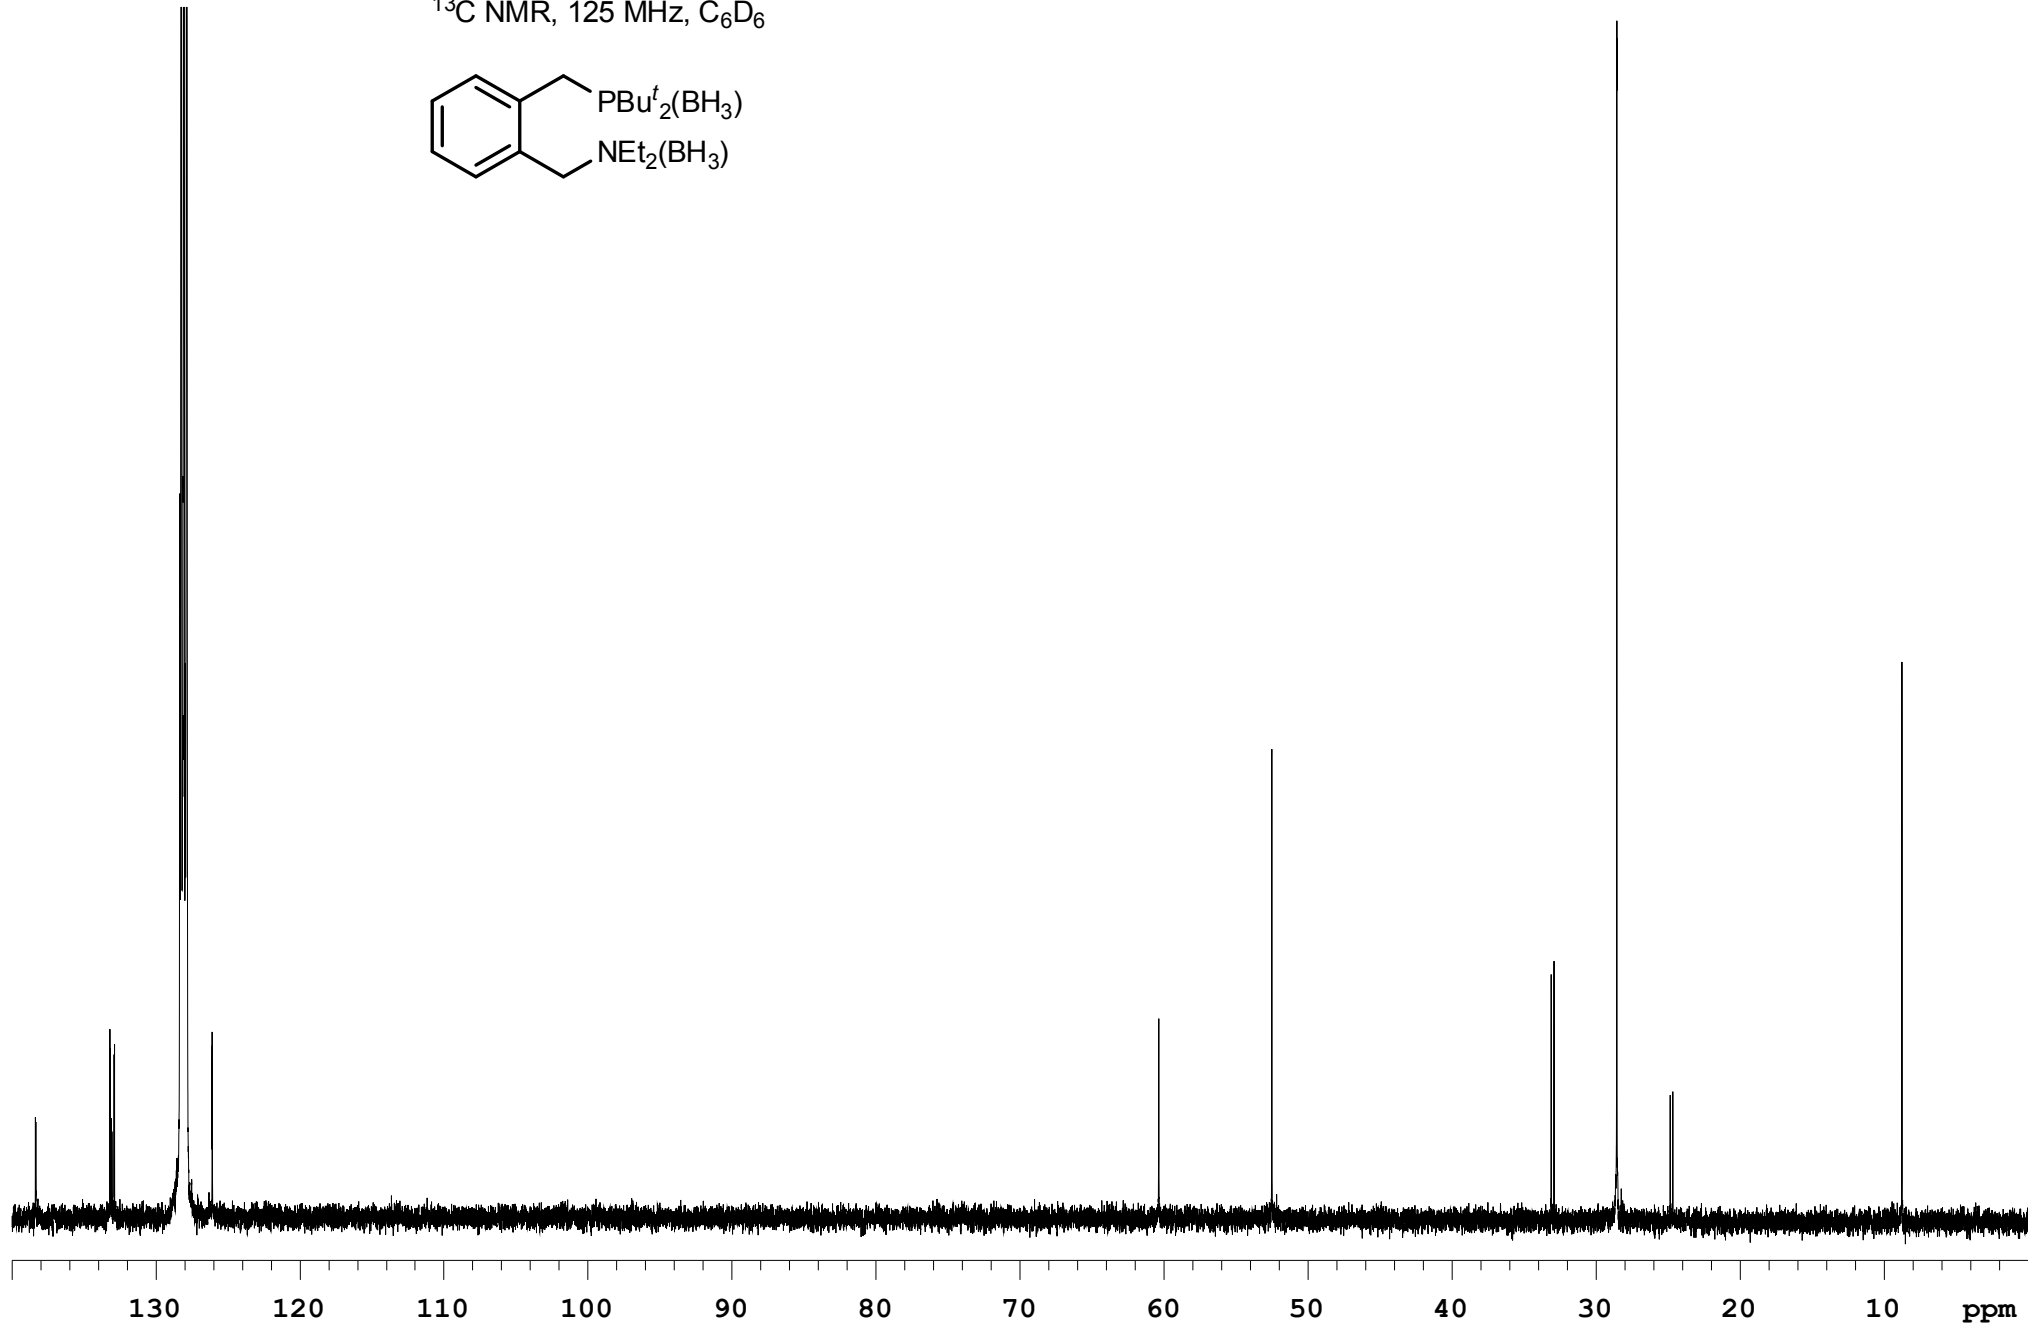



**Compound 12a**  
<sup>1</sup>H NMR, 500 MHz, C<sub>6</sub>D<sub>6</sub>

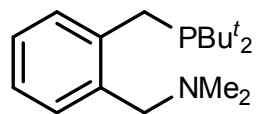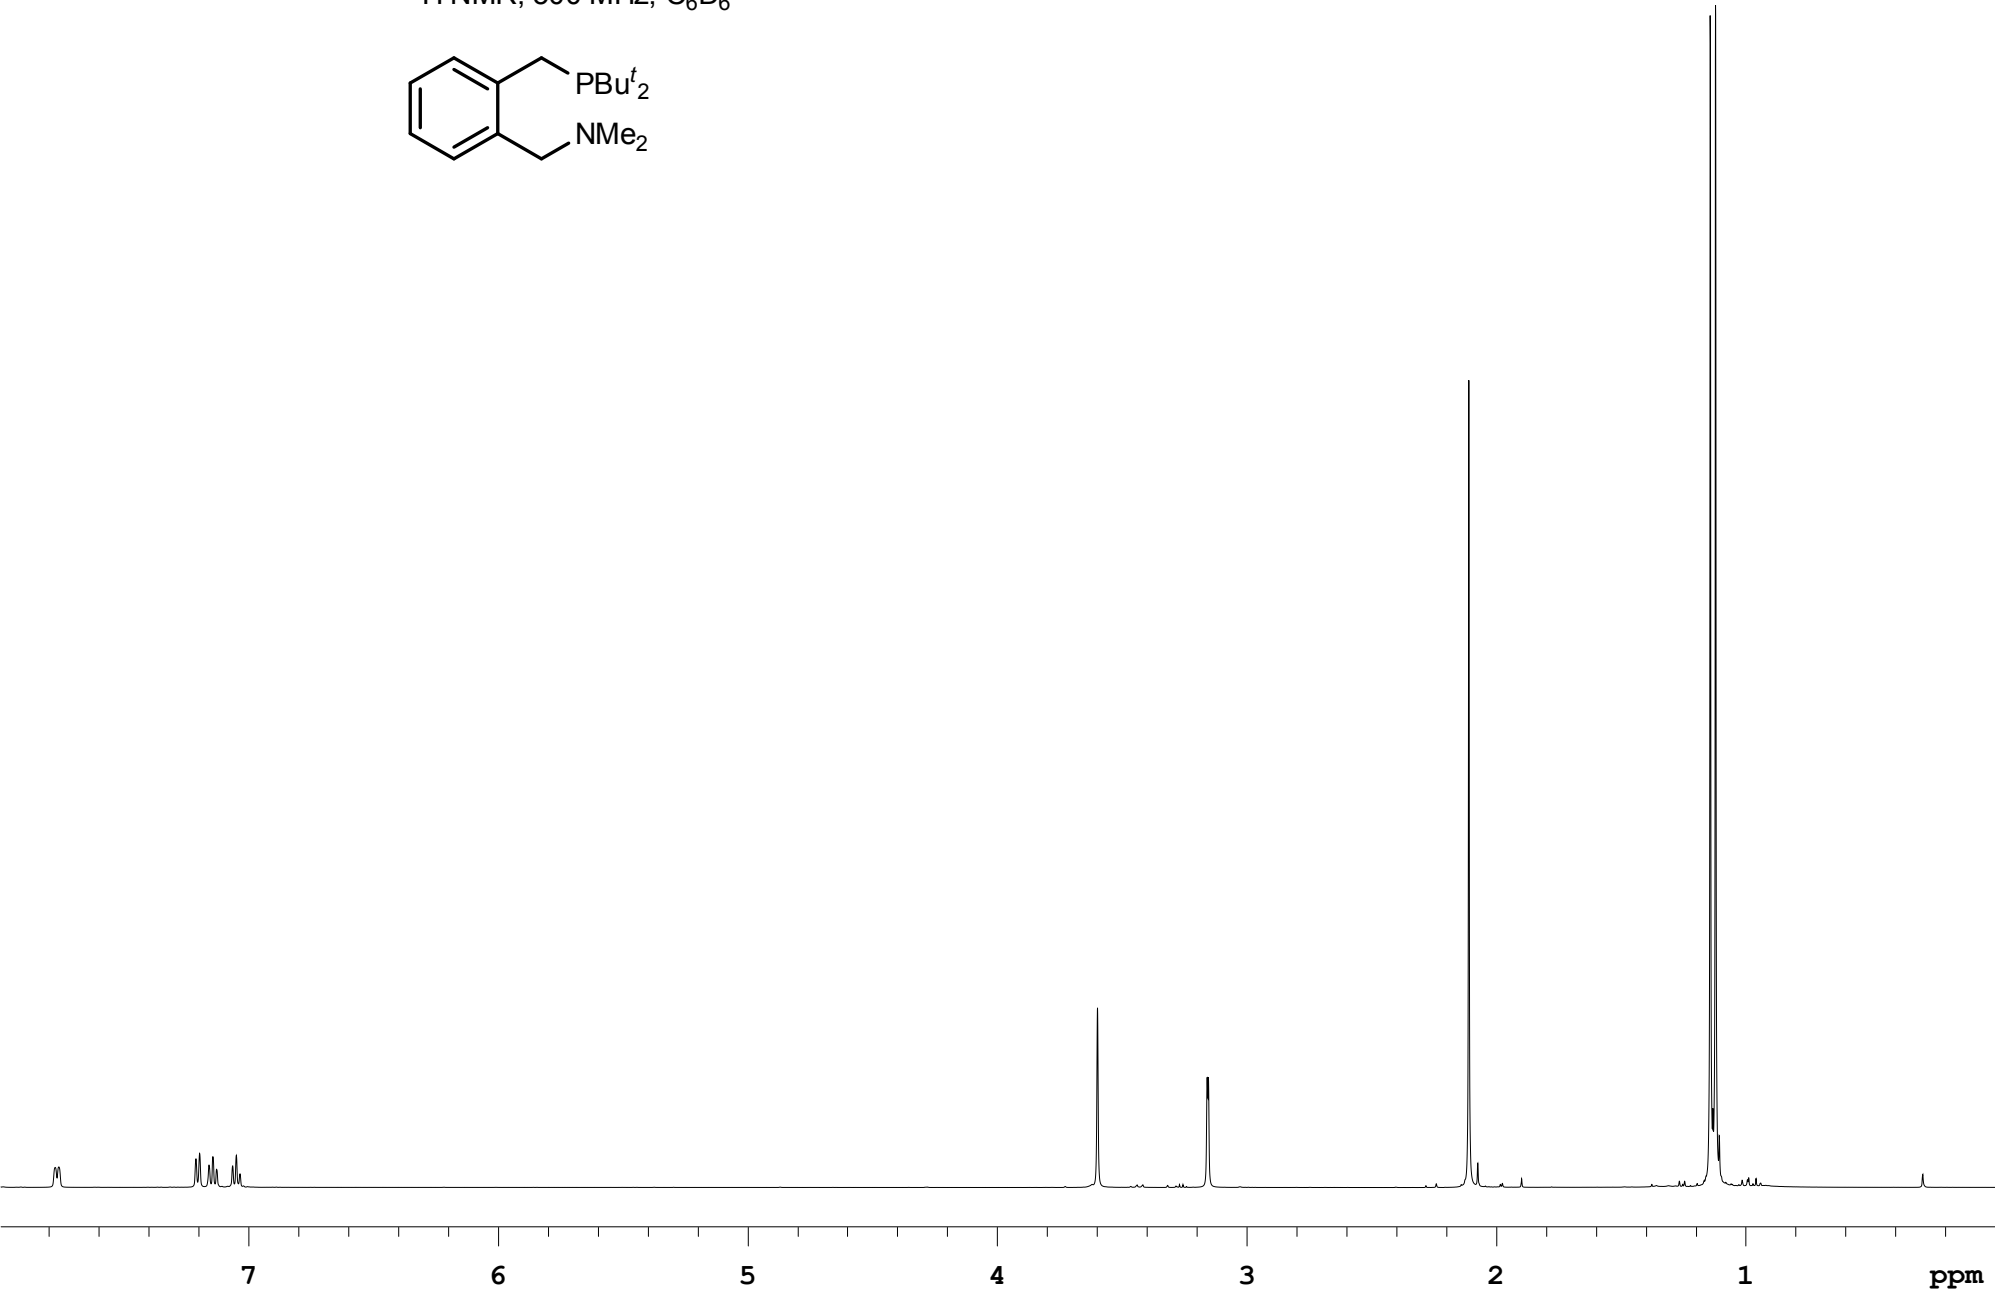

**Compound 12a**  
<sup>13</sup>C NMR, 125 MHz, C<sub>6</sub>D<sub>6</sub>

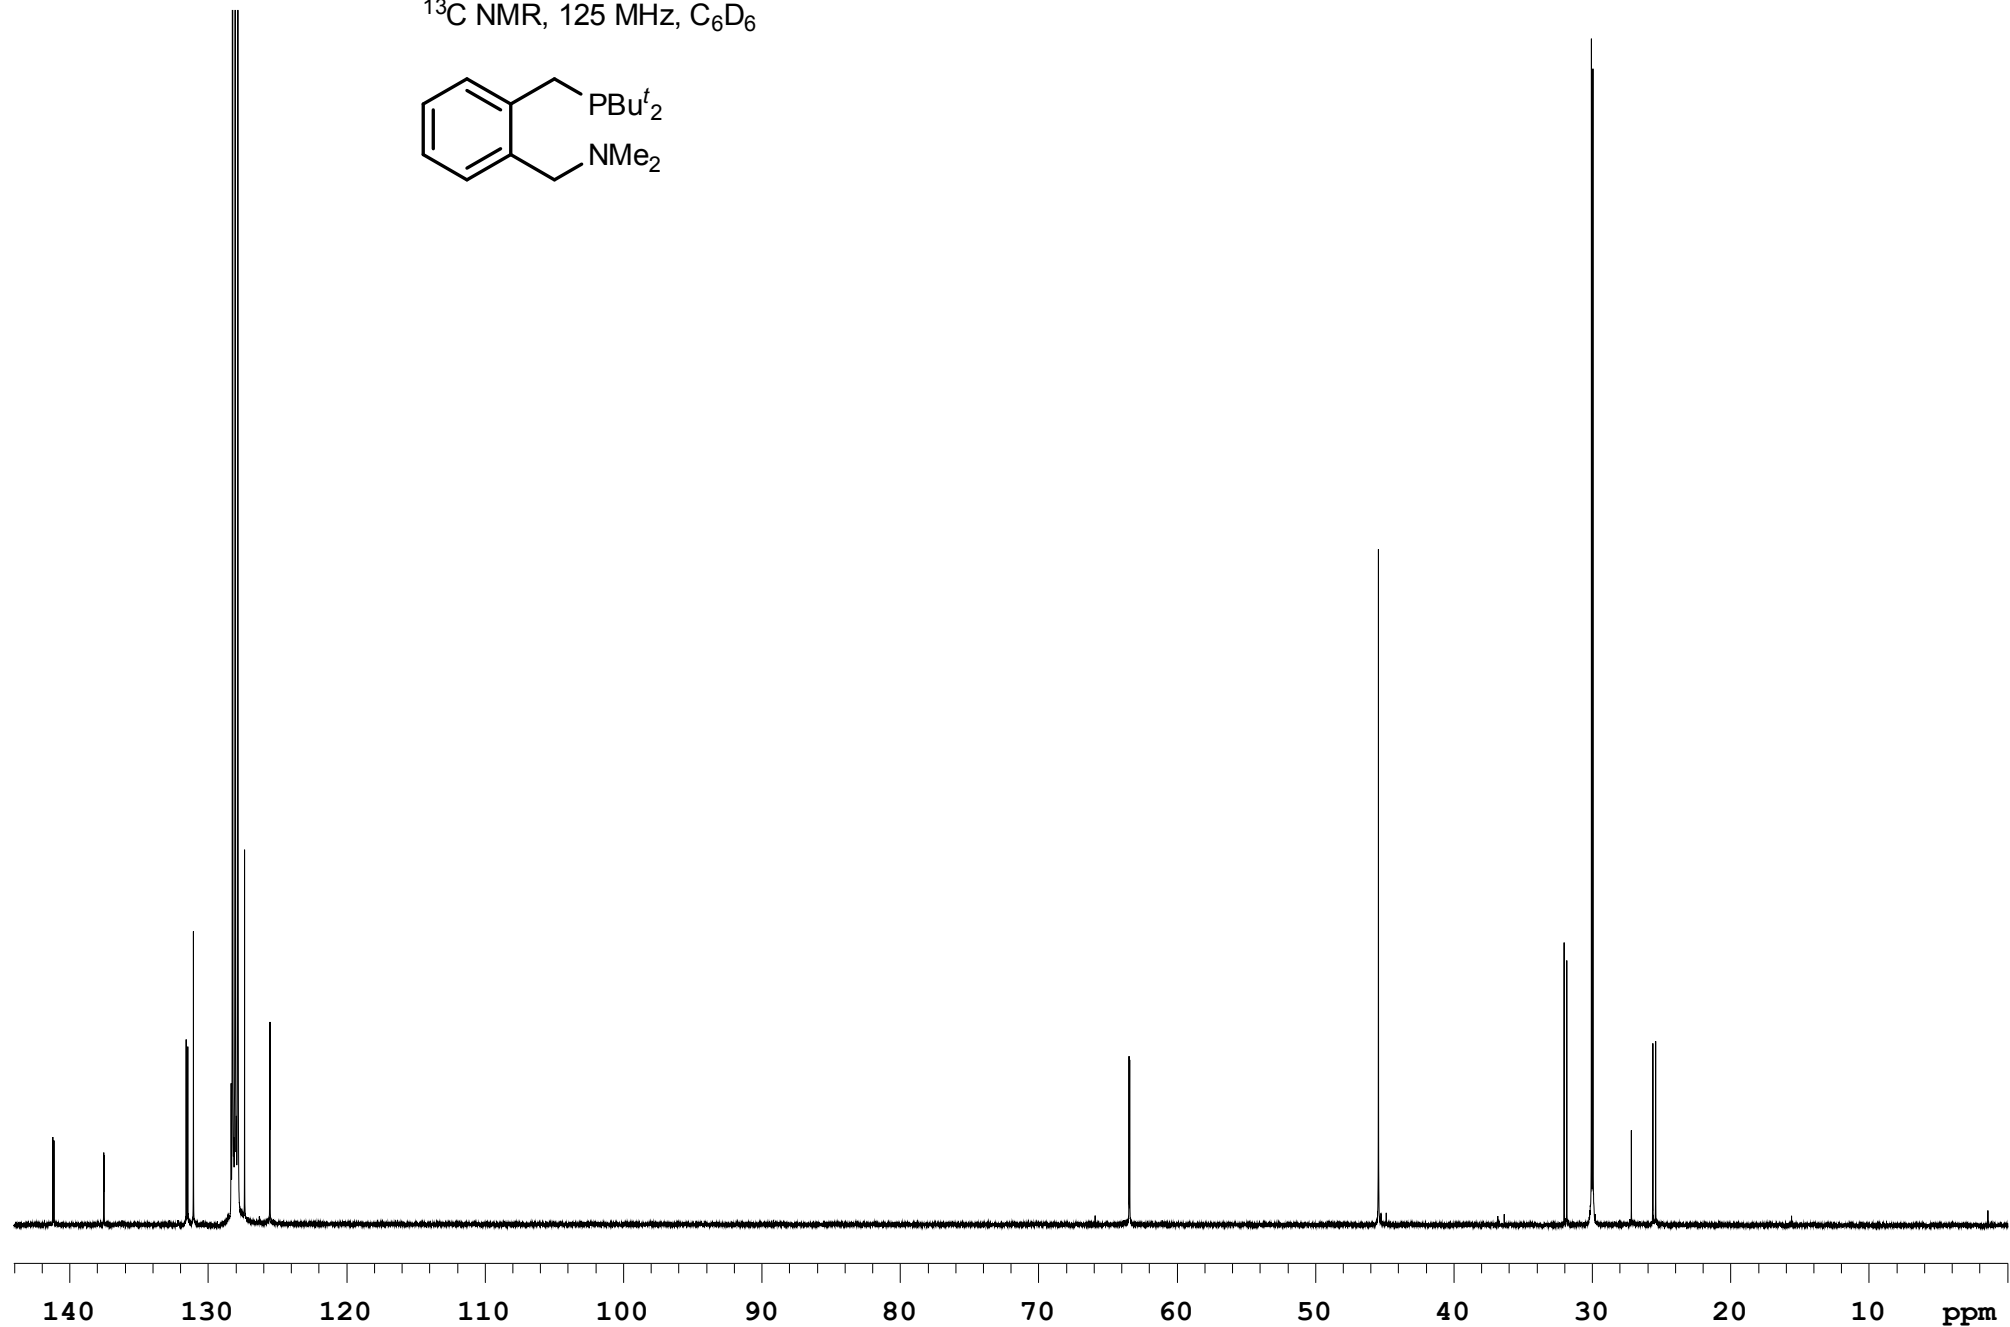

Supplement: c3ob42244e_3.pdf [file c3ob42244e_3.pdf]
