# Supplementary material for: Synthesis and characterisation of novel o-xylene-based P,E ligands
Source: Royal Society of Chemistry journal article supplement (doi:10.1039/c3ob42244e), 2013-12-13

**Compound 12b**

<sup>1</sup>H NMR, 500 MHz, C<sub>6</sub>D<sub>6</sub>

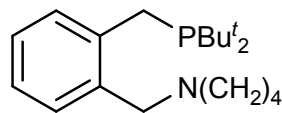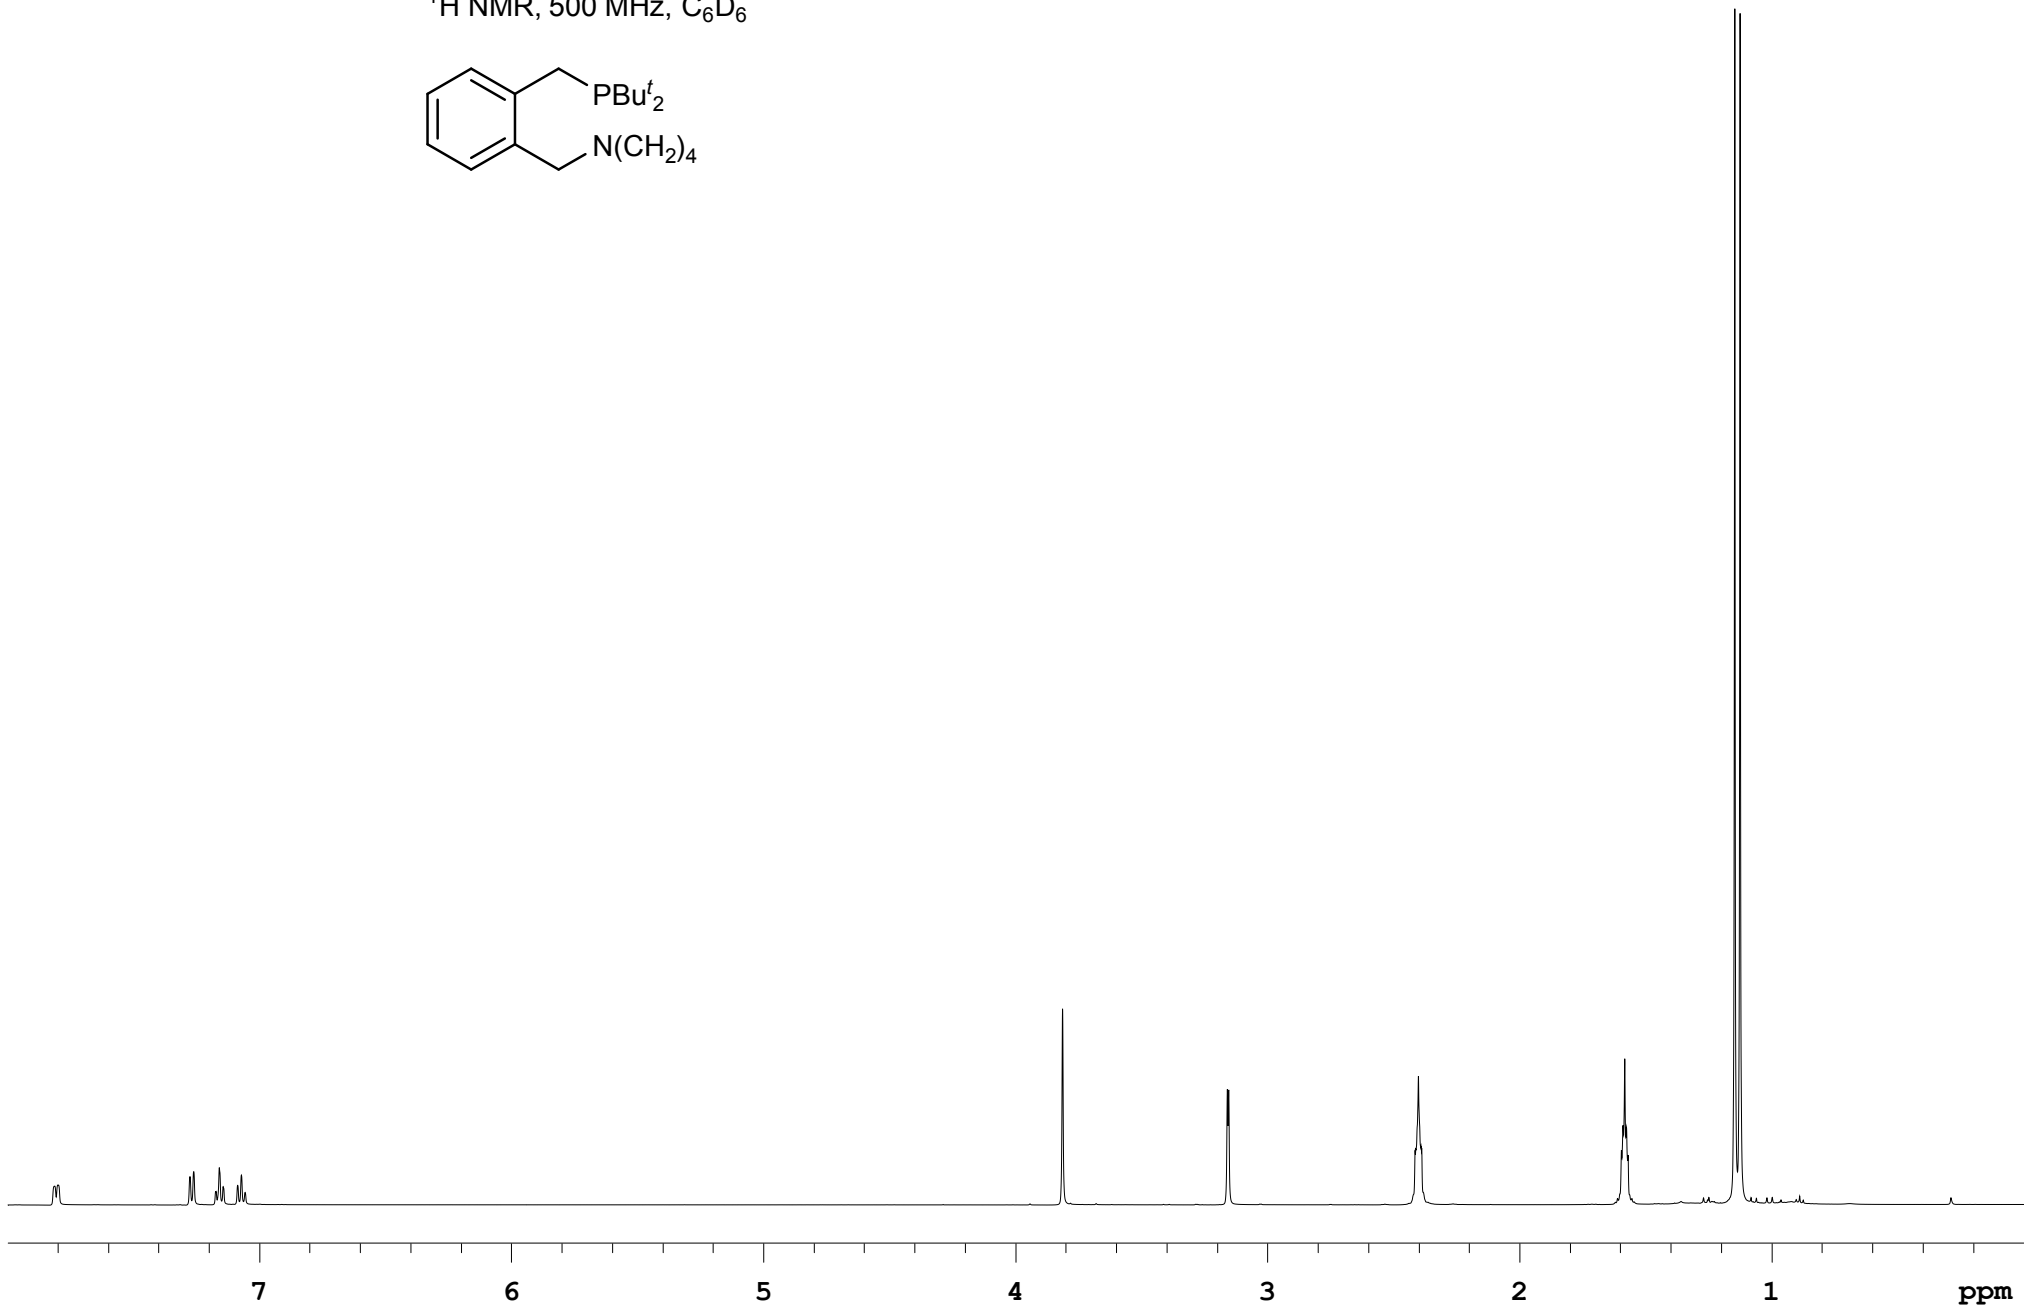

**Compound 12b**  
<sup>13</sup>C NMR, 125 MHz, C<sub>6</sub>D<sub>6</sub>

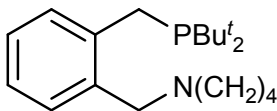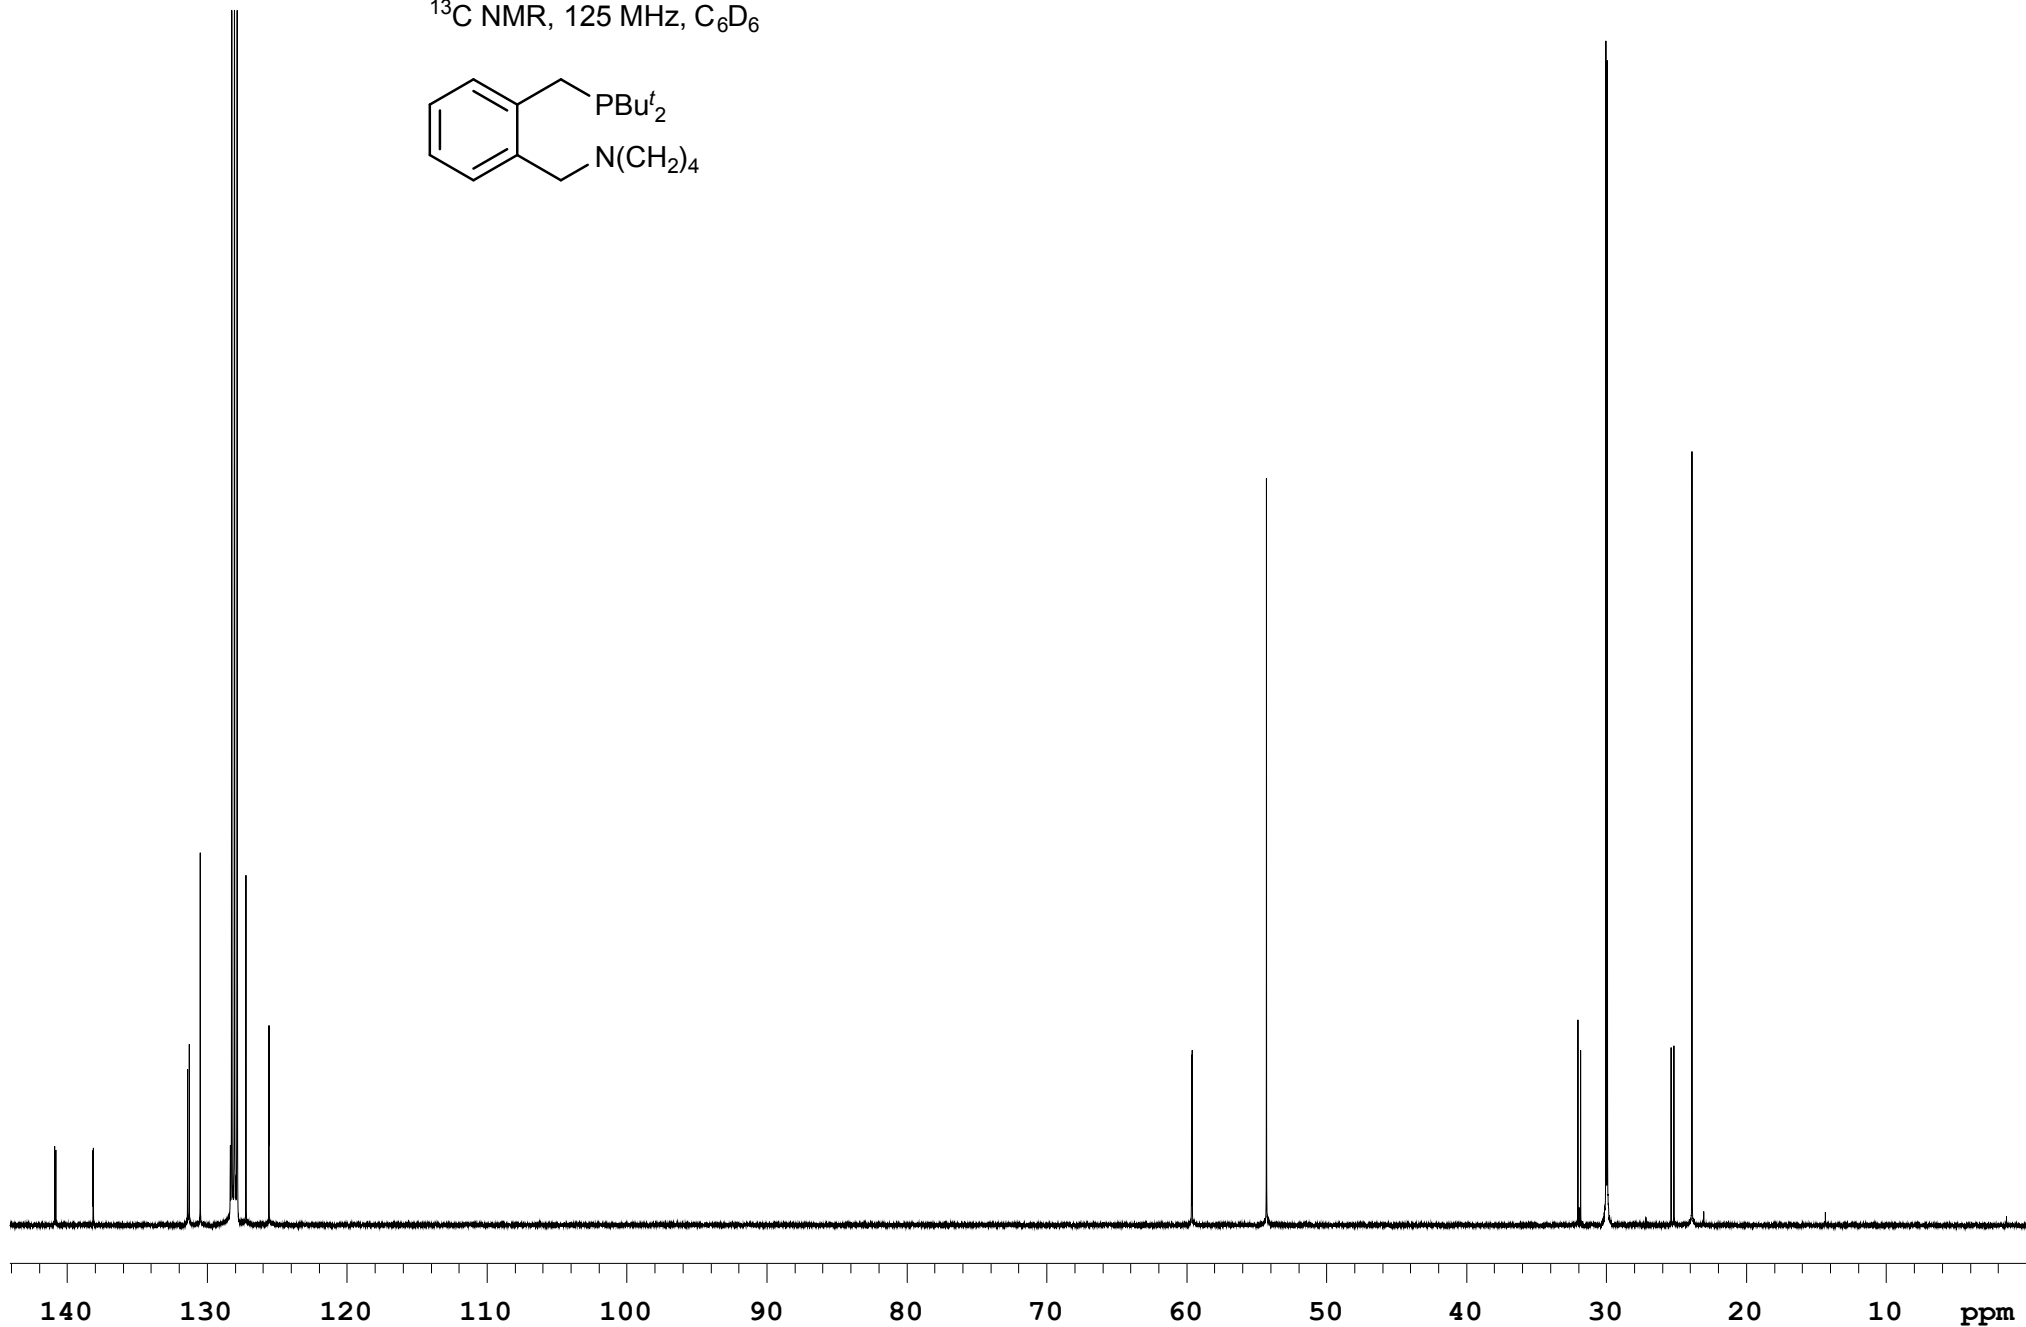

**Compound 12c**  
<sup>1</sup>H NMR, 500 MHz, C<sub>6</sub>D<sub>6</sub>

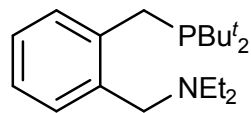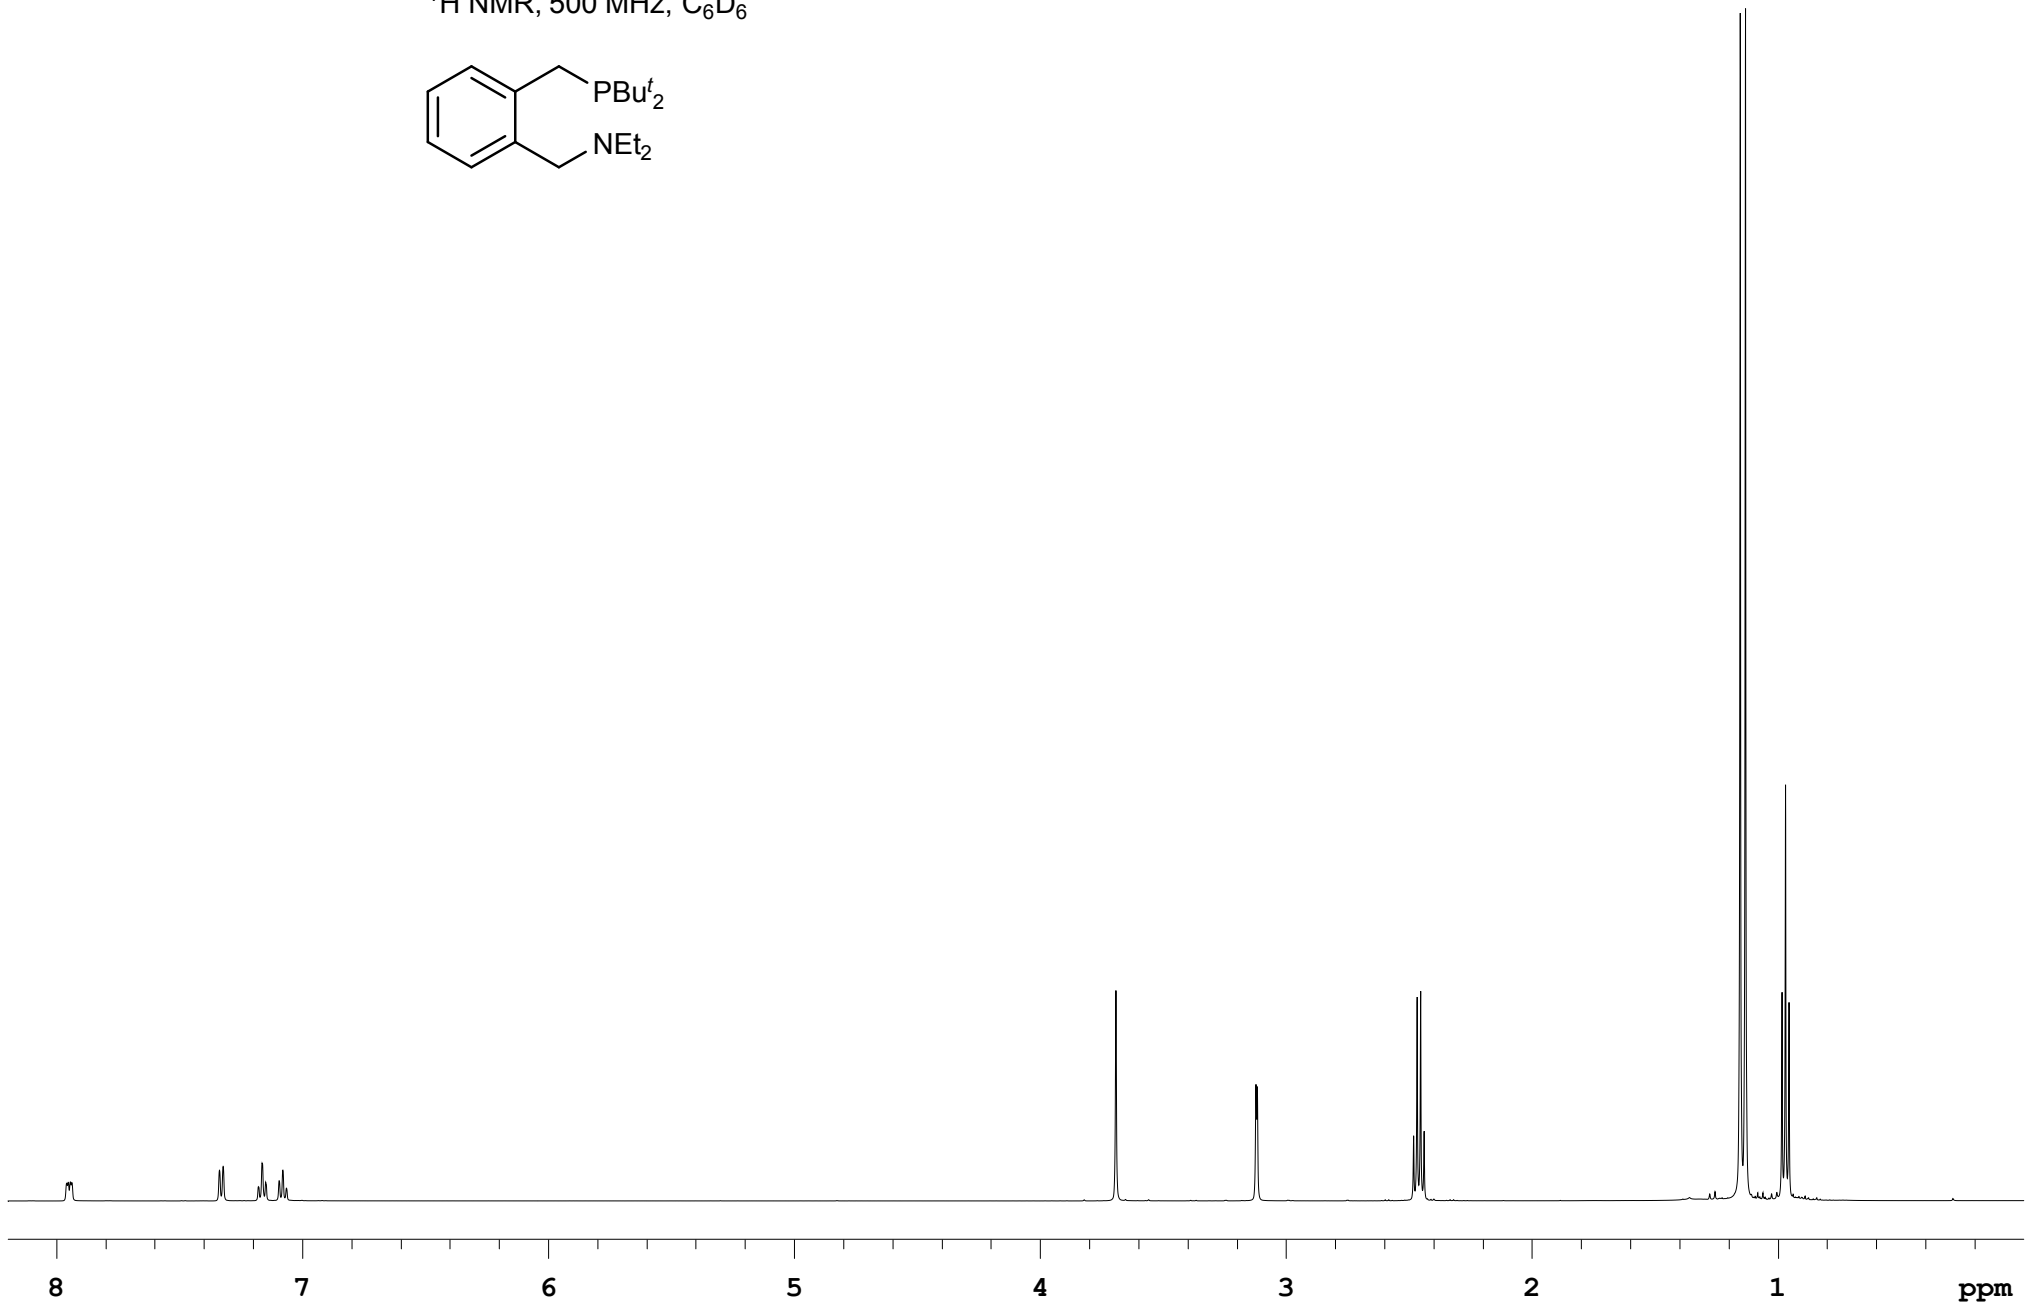

**Compound 12c**  
<sup>13</sup>C NMR, 125 MHz, C<sub>6</sub>D<sub>6</sub>

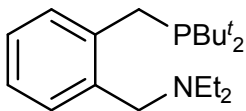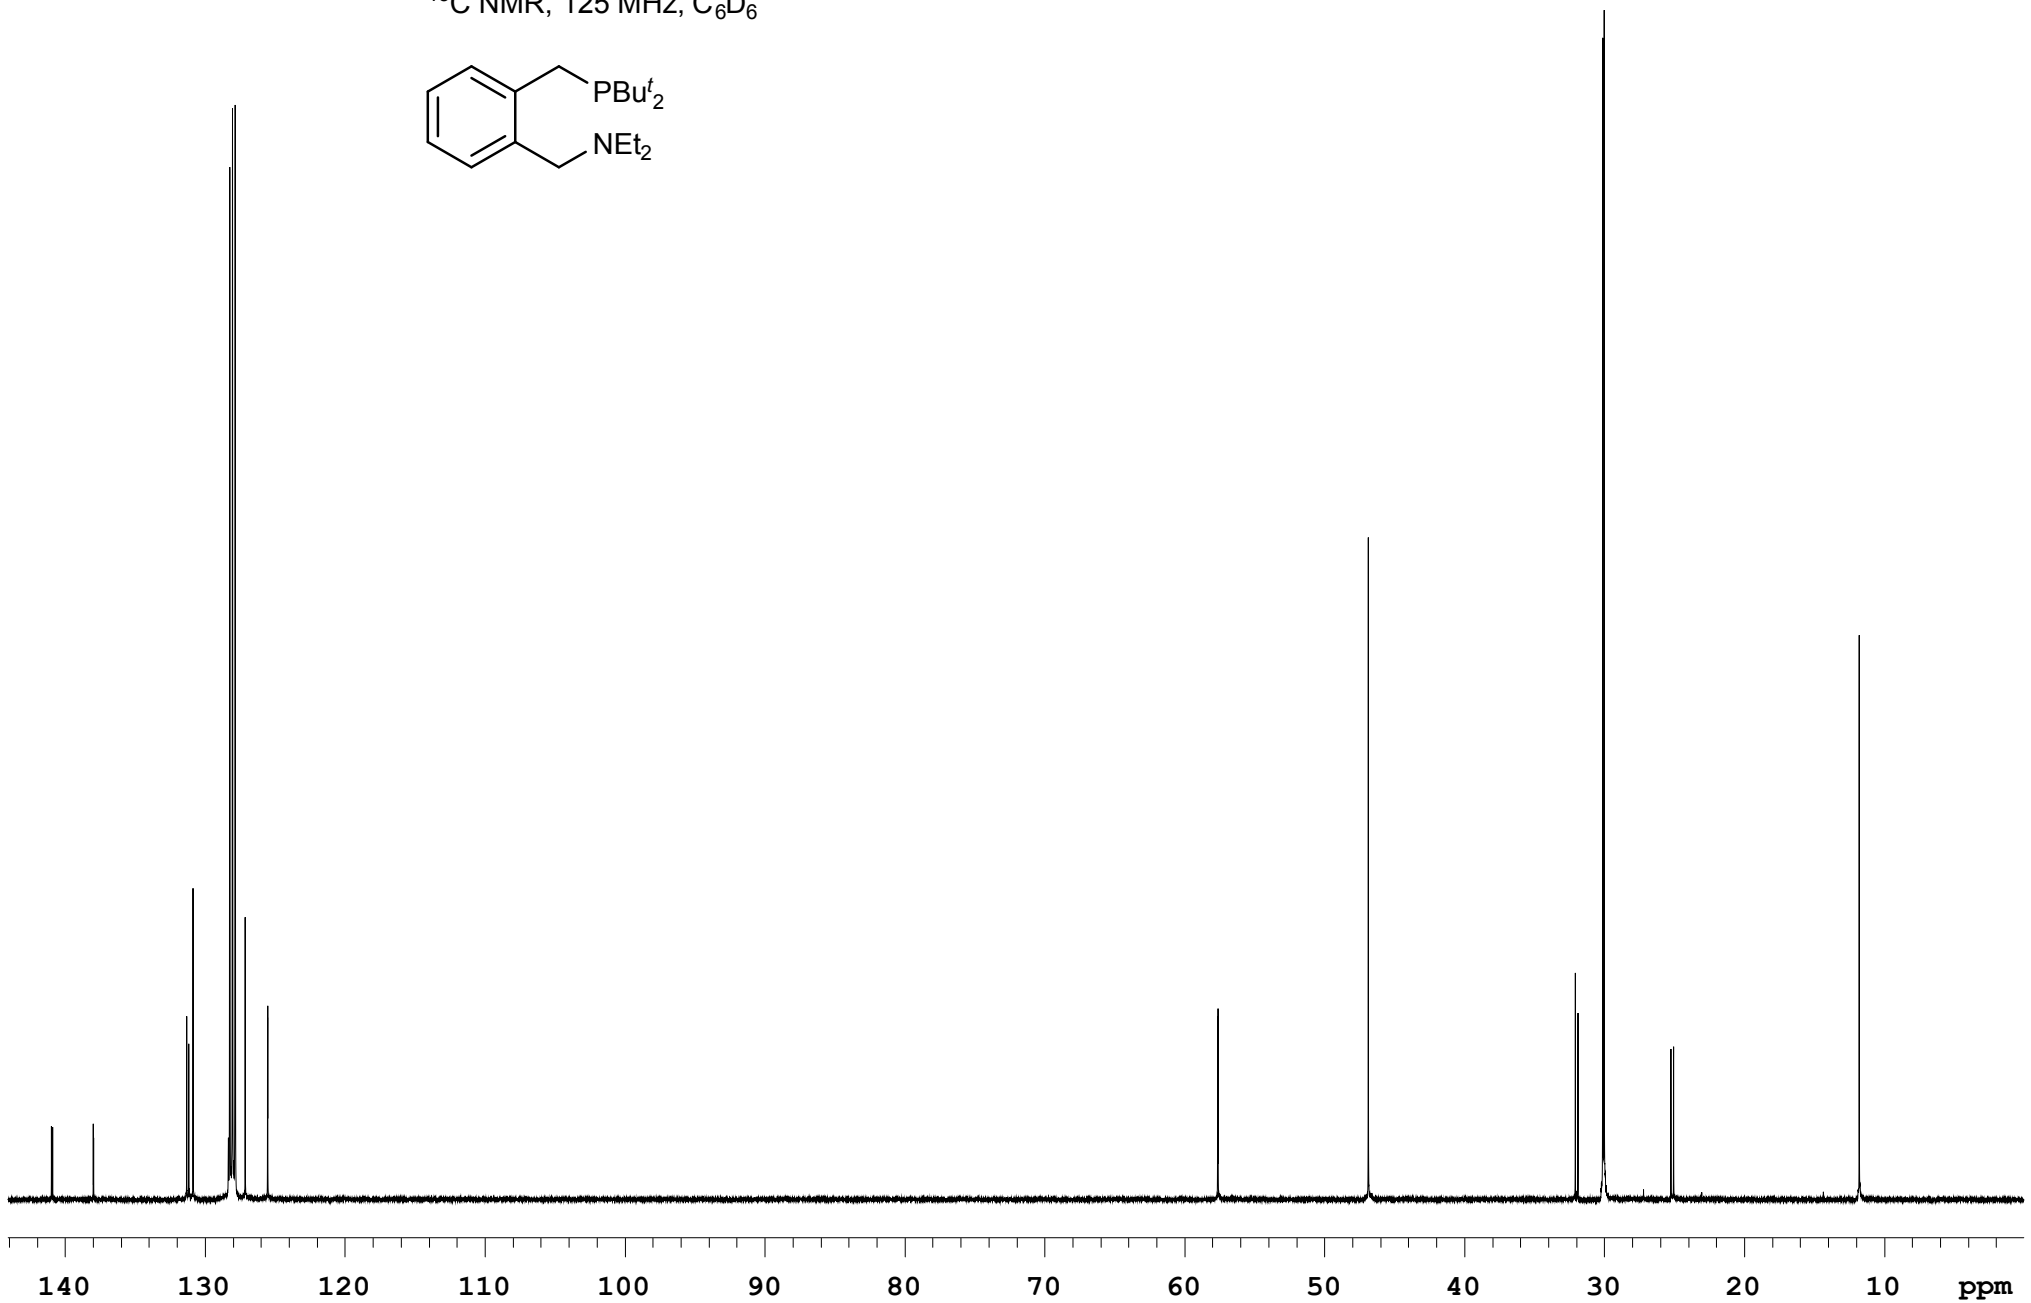

**Compound 13**  
<sup>1</sup>H NMR, 500 MHz, C<sub>6</sub>D<sub>6</sub>

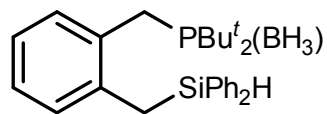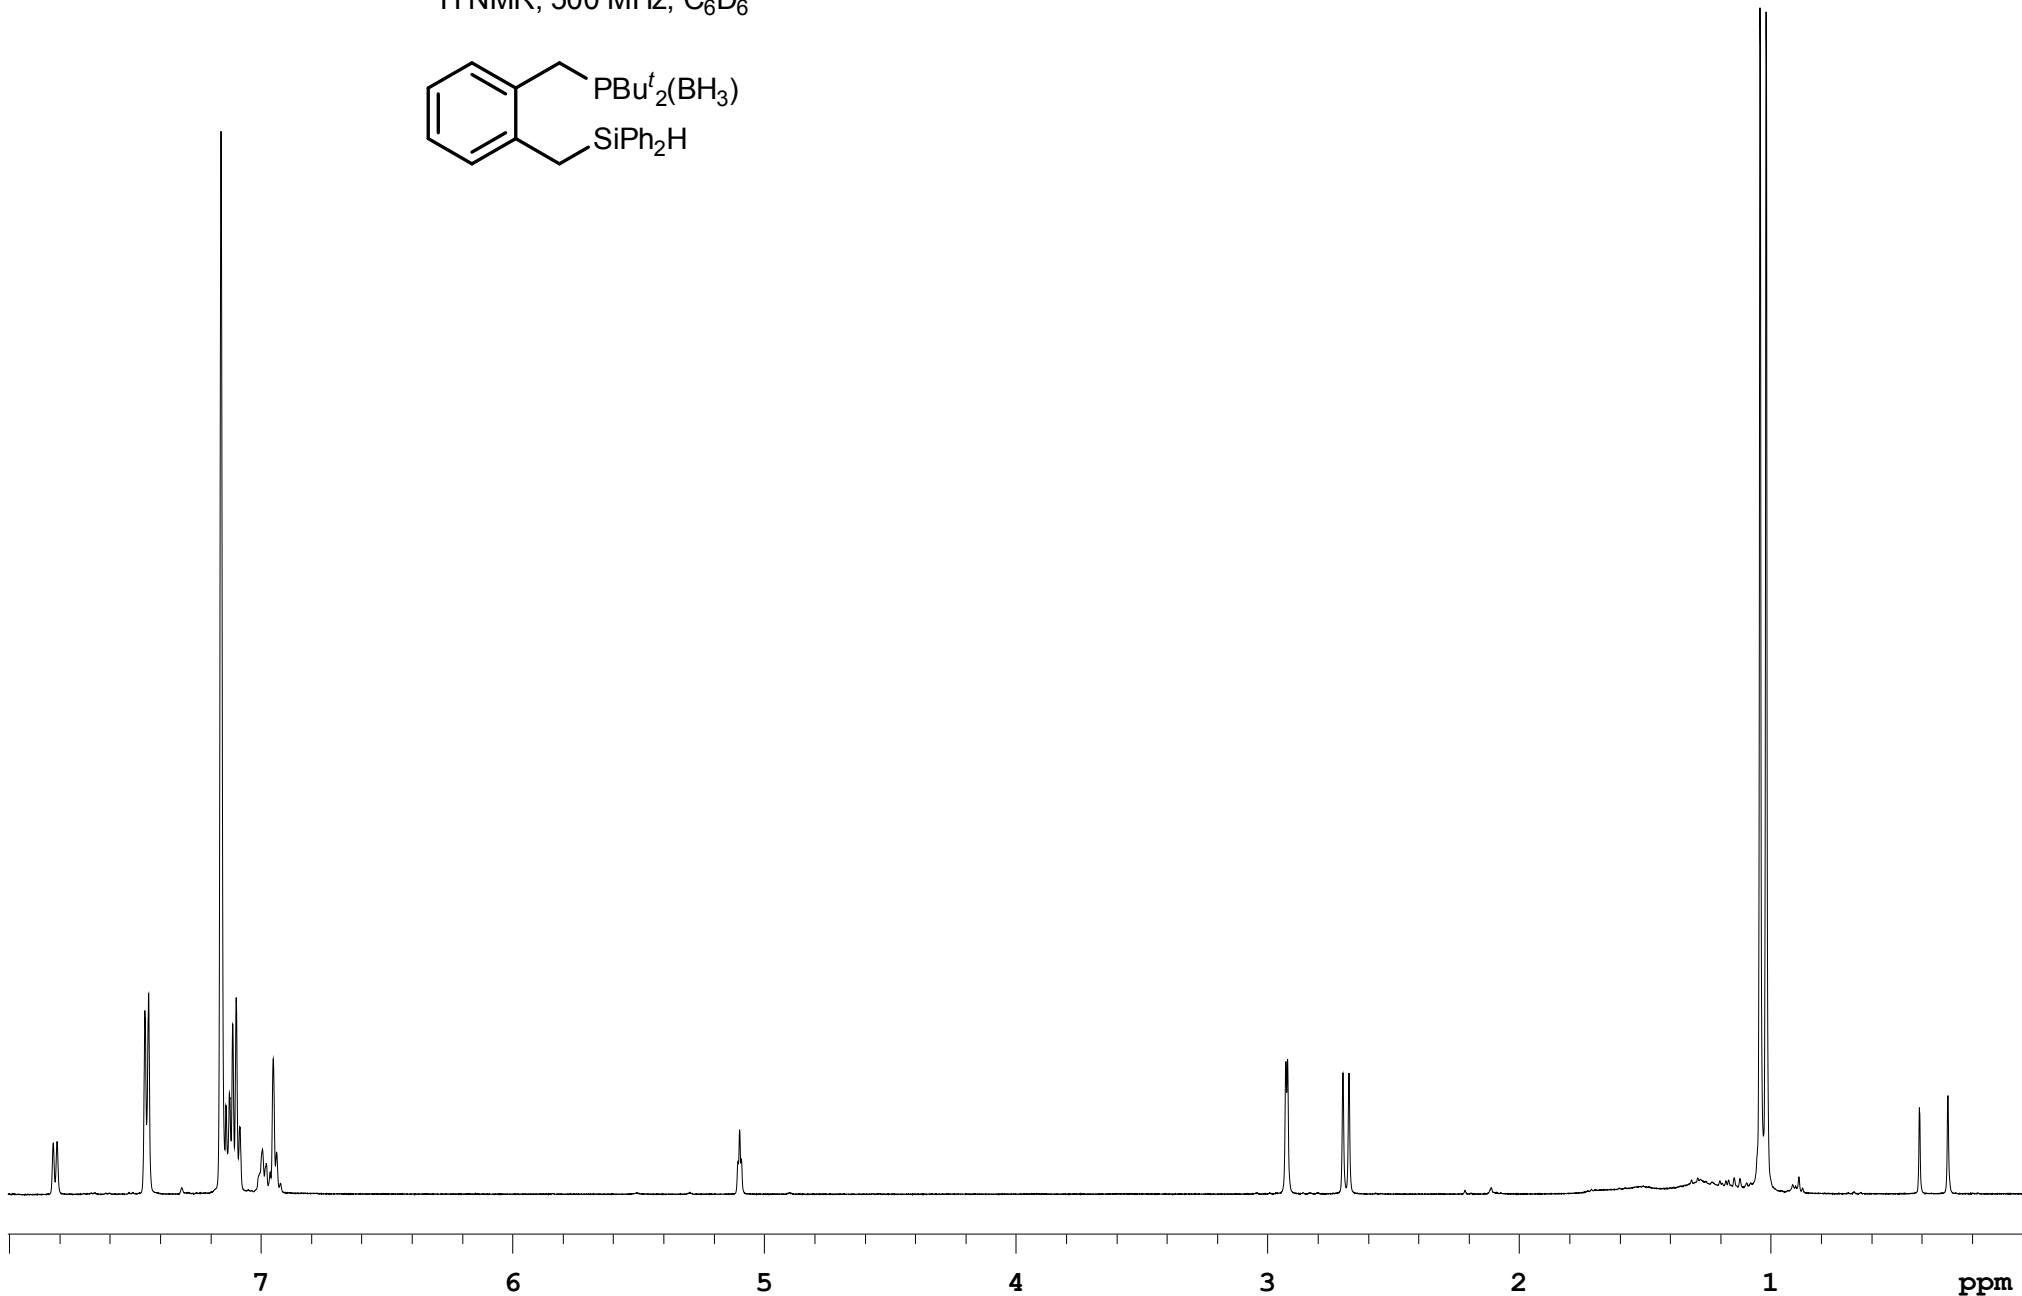

### Compound 13

<sup>13</sup>C NMR, 125 MHz, C<sub>6</sub>D<sub>6</sub>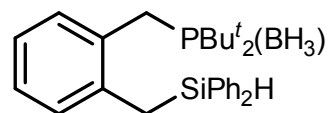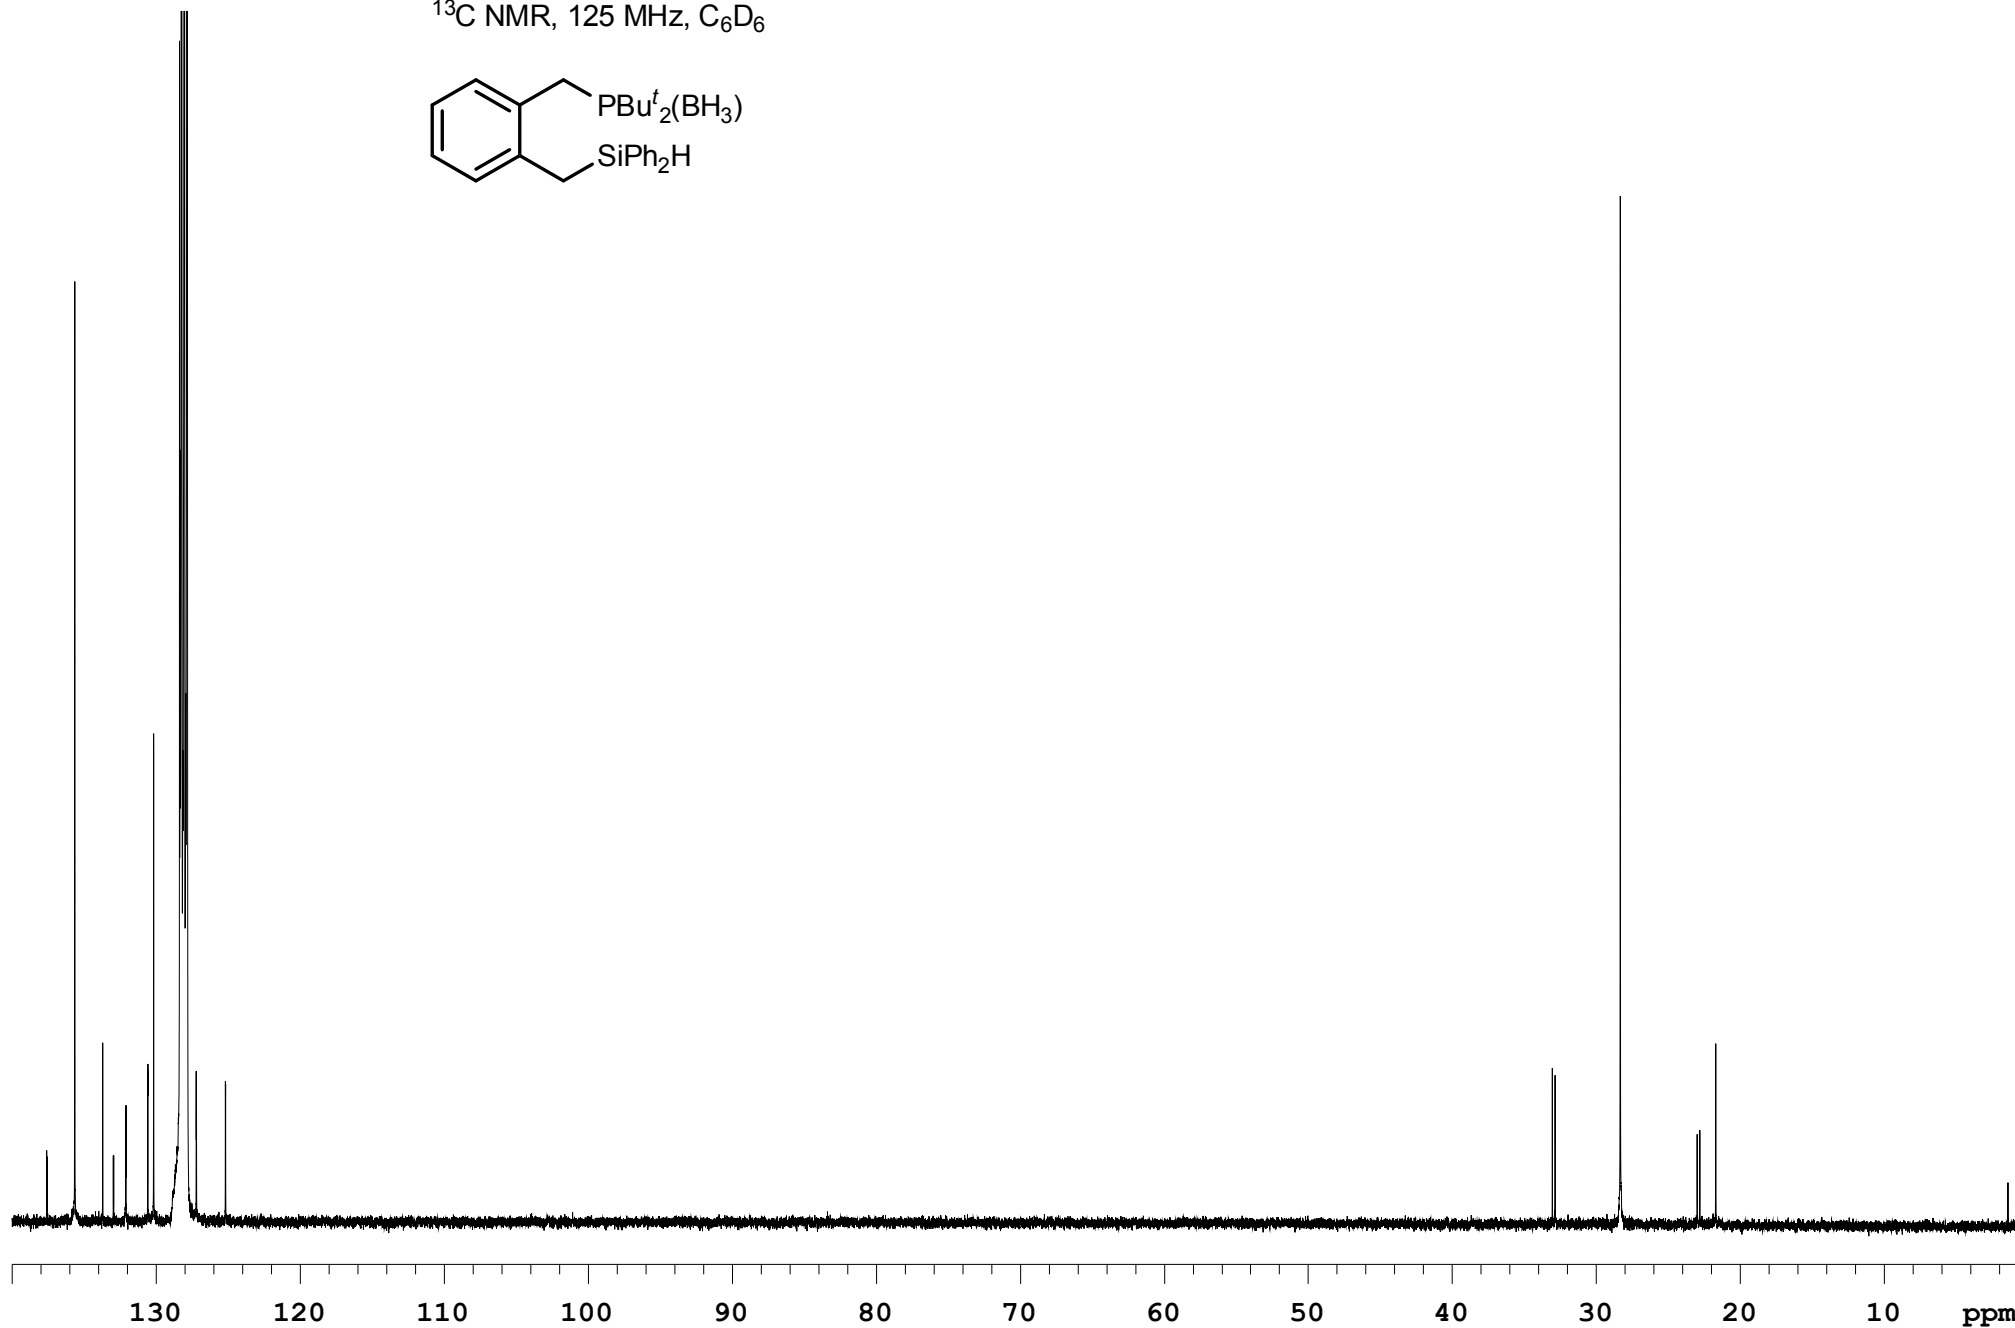

### Compound 14

<sup>1</sup>H NMR, 500 MHz, C<sub>6</sub>D<sub>6</sub>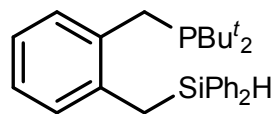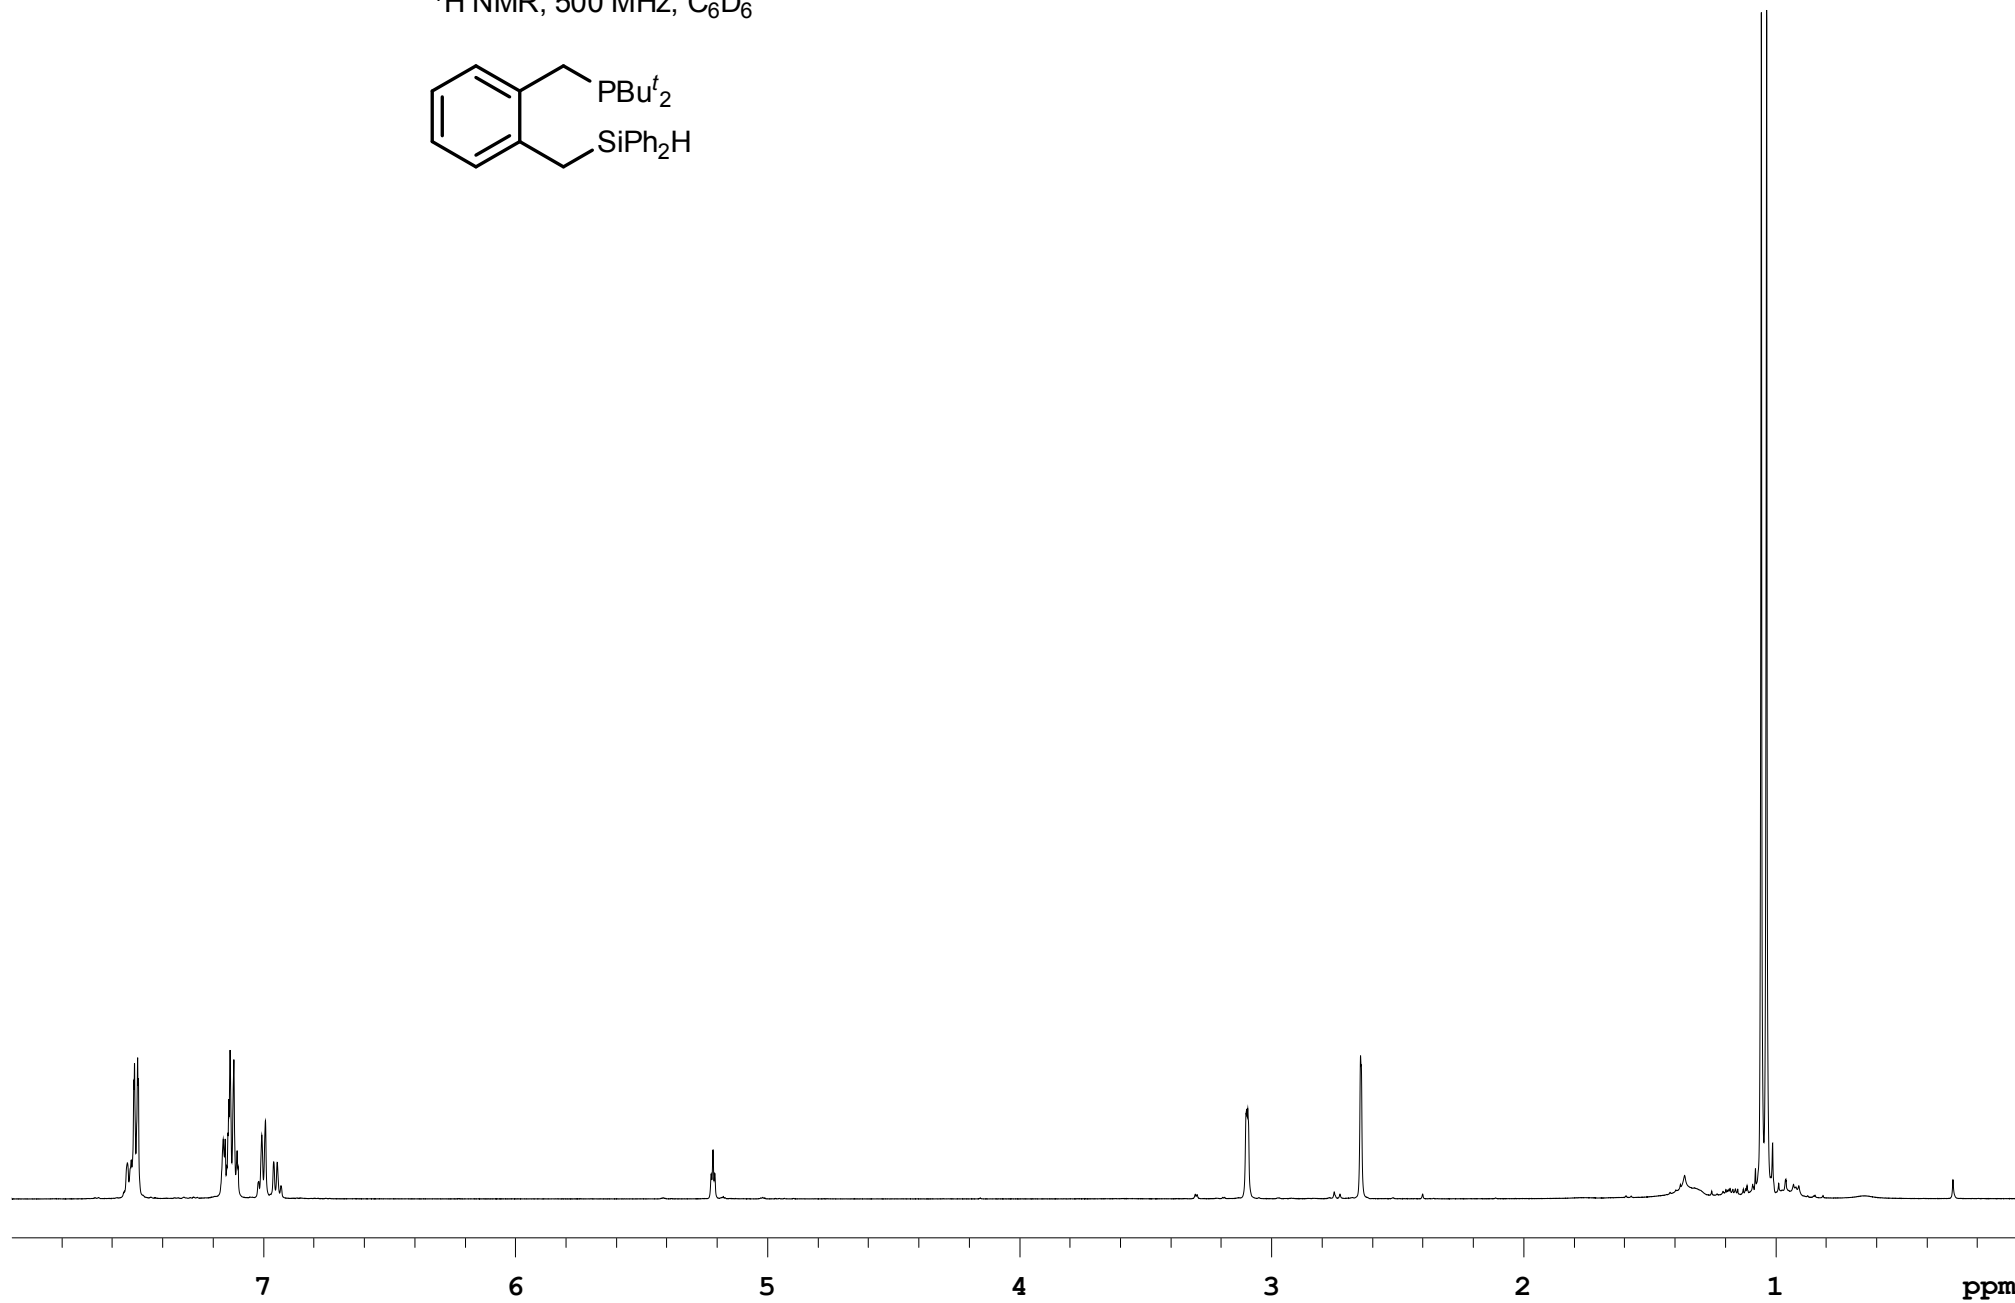

### Compound 14

<sup>13</sup>C NMR, 125 MHz, C<sub>6</sub>D<sub>6</sub>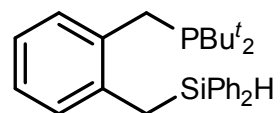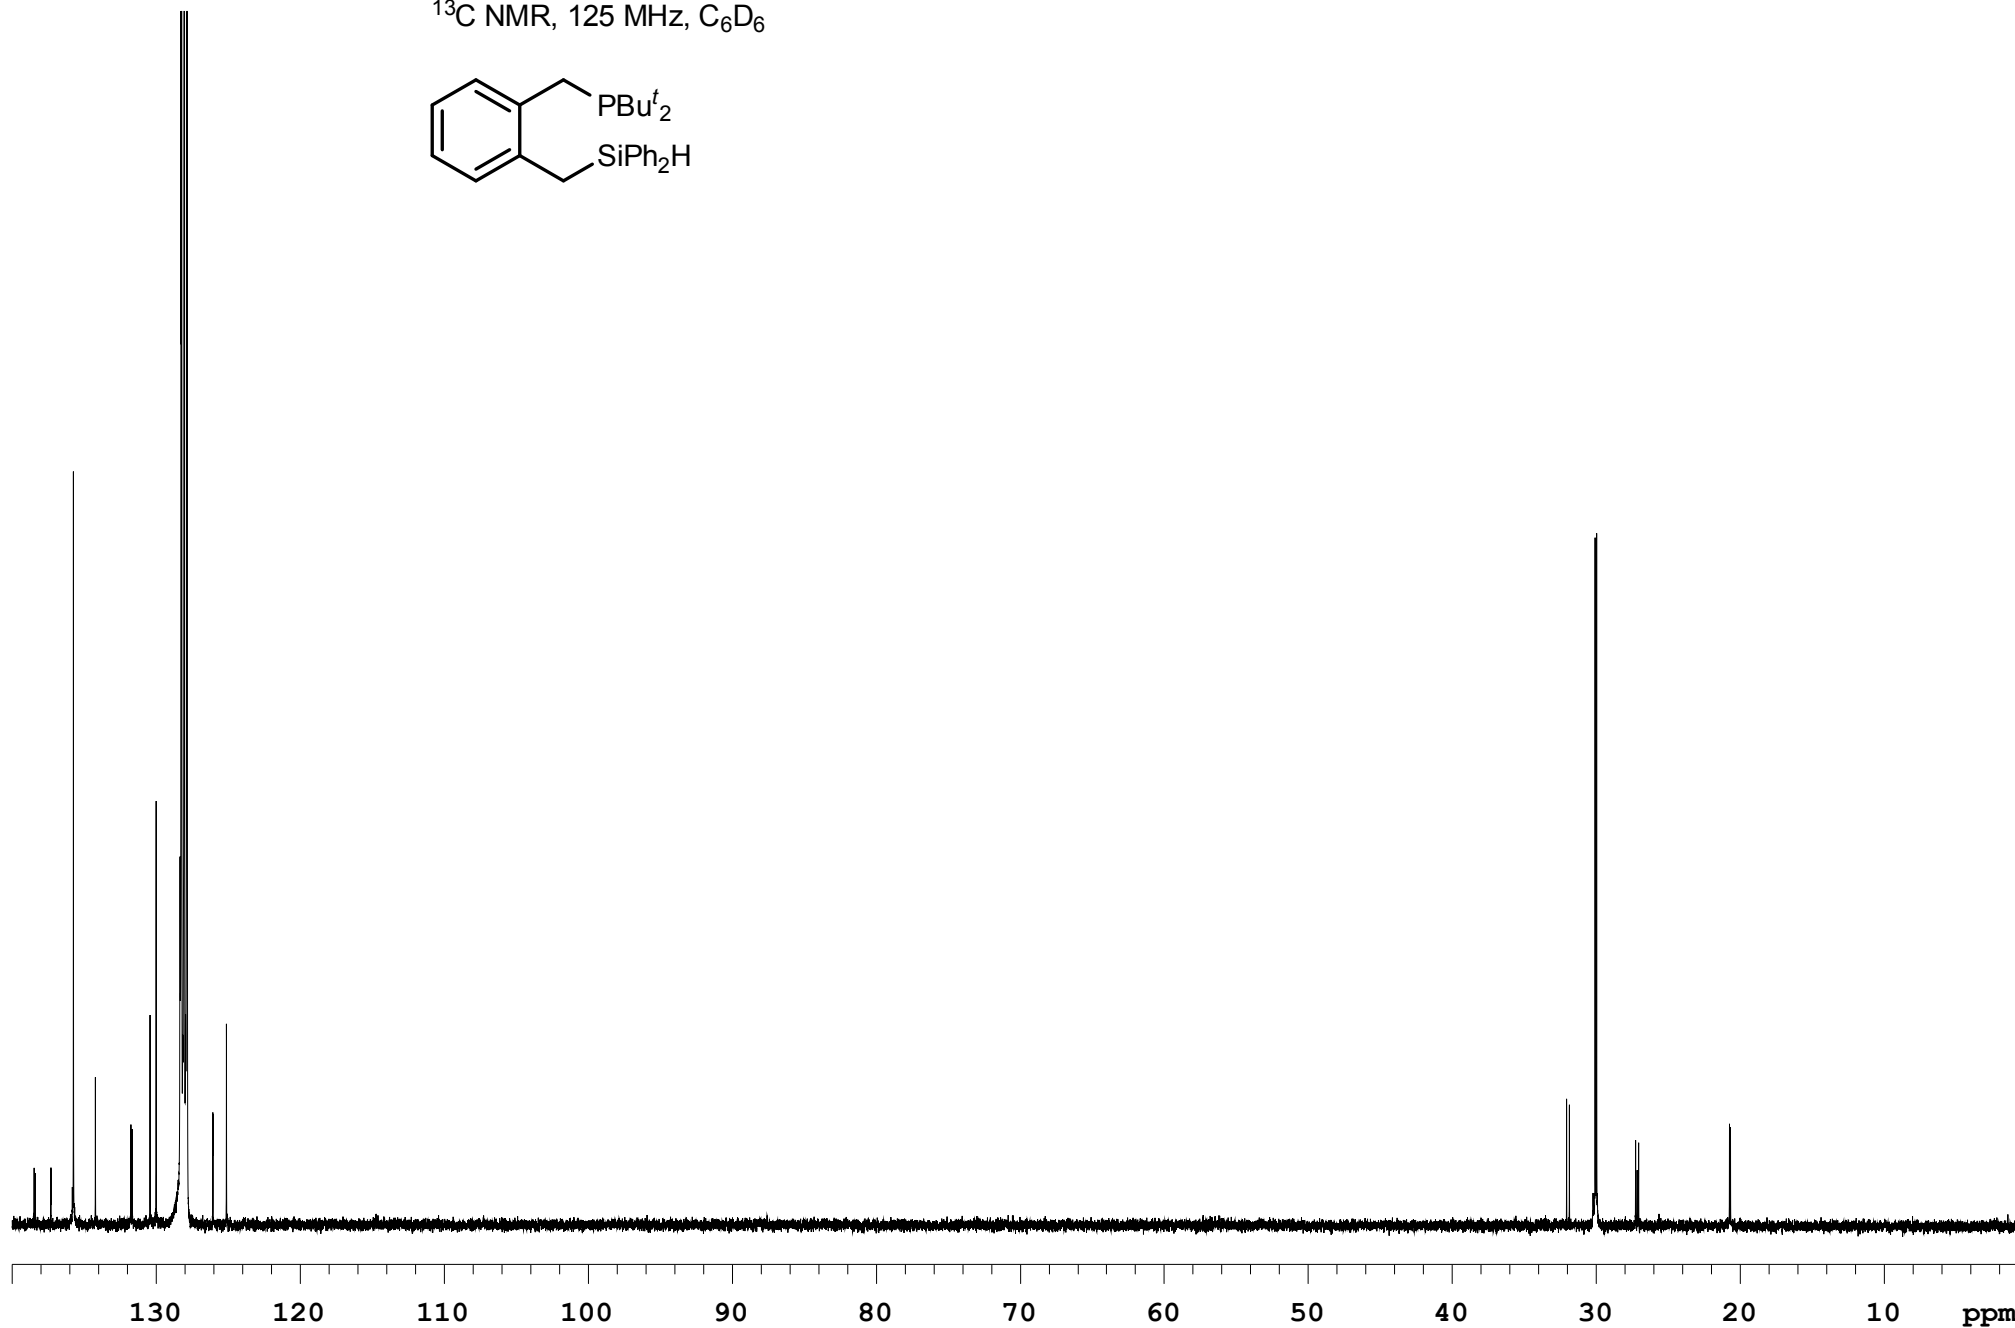

Supplement: c3ob42244e_4.pdf [file c3ob42244e_4.pdf]
